# Supplementary material for: Normal transcription of cellulolytic enzyme genes relies on the balance between the methylation of H3K36 and H3K4 in Penicillium oxalicum
Source: Biotechnol Biofuels. 2019 Aug 20;12:198. doi: 10.1186/s13068-019-1539-z (PMC6700826; doi:10.1186/s13068-019-1539-z)
Supplement: Supplementary file 7 — Additional file 7: Spreadsheet S3. Putative proteins interacting with PoSwd2 identified using TAP-MS experiments. [file 13068_2019_1539_MOESM7_ESM.xlsx]

## Sheet: Interacting proteins
Spreadsheet S3. Putative proteins interacting with PoSwd2 identified by tandem affinity purificationmass spectrometry (TAP-MS) experiments.
Gene ID	Annotation
PDE_02489	Set1, Histone-lysine N-methyltransferase, H3 lysine-4 specific GN=set1
PDE_00581	Swd1, Set1 complex component swd1,WD repeat protein
PDE_07451	Swd2, WD repeat-containing protein 82- related to histone methyltransferase; PTK9 protein tyrosine kinase 9
PDE_07010	Swd3, WD repeat-containing protein 5; maybe SWD3; related to S.pombe beta-transducin
PDE_09172	Sdc1, Set1 complex component sdc1, - related to histone-lysine N-methyltransferase
PDE_01442	Bre2, Set1 complex component ash2, Histone-lysine N-methyltransferase (Bre2), putative
PDE_05171	Spp1, Set1 complex component spp1; PHD transcription factor, putative
PDE_04196	histone-lysine N-methyltransferase SUV420H; set9- related to SET2
PDE_00582	DNA-directed RNA polymerase II subunit A
PDE_05914	DNA-directed RNA polymerase II subunit B
PDE_00270	DNA-directed RNA polymerase II subunit E, RPB5;
PDE_08705	DNA-directed RNA polymerase II subunit C, RPB3
PDE_00902	DNA-directed RNA polymerase II subunit J,RPB11a
PDE_07570	DNA-directed RNA polymerase II subunit H;
PDE_05819	DNA-directed RNA Polymerase II subunit L
PDE_07155	pre-mRNA-processing factor 40; formin binding protein (FNB3)
PDE_00328	Transcription initiation factor TFIID subunit 9
PDE_06651	Putative transcription factor
PDE_03581	BRE1 - E3 ubiquitin ligase for Rad6p,
PDE_03961	UBI4 - Ubiquitin C
PDE_00674	Actin-related protein 4; Chromatin interaction component of the NuA4 histone acetyltransferase;D-serine dehydratase
PDE_02324	SER33 - 3-phosphoglycerate dehydrogenase
PDE_04139	YEAST Uncharacterized transcriptional regulatory protein YLR278C, Protein of unknown function localised to nucleus
PDE_02849	translation initiation factor eIF-5A;
PDE_08649	Translation elongation factor EF-2 subunit, putative
PDE_08779	Transcription factor BYE1, PHD finger domain protein, CTI6 - Cyc8-Tup1 Interacting protein
PDE_00660	WD repeat-containing protein, related to TRANSCRIPTIONAL REPRESSOR RCO-1
PDE_01304	actin-related protein 5; chromatin remodeling complex subunit (Arp5)
PDE_08223	F-box-like/WD repeat-containing protein； SIF2 - Sir4p interacting protein
PDE_04315	chaperonin GroEL;Antigenic mitochondrial protein HSP60, putative
PDE_02985	Quinone oxidoreductase PIG3
PDE_00455	tyrosyl-tRNA synthetase
PDE_03397	60S ribosomal protein L24
PDE_07230	S-adenosylmethionine synthetase; ETH-1 - methionine adenosyltransferase ETH-1
PDE_09149	molecular chaperone HtpG; HSP80
PDE_04873	pyruvate decarboxylase PdcA, putative
PDE_06117	Glutamate/Leucine/Phenylalanine/Valine dehydrogenase, putative
PDE_06476	F-type H+-transporting ATPase subunit alpha
PDE_02494	Isocitrate dehydrogenase [NAD] subunit 1, mitochondrial
PDE_02544	tyrosine 3-monooxygenase/tryptophan 5-monooxygenase activation protein - probable 14-3-3-like protein
PDE_01634	phosphoinositide-specific phospholipase C
PDE_01191	conserved hypothetical protein ; family C56 non-peptidase homologues (Aspergillus fumigatus)
PDE_01582	Palmitoyltransferase erf2;Palmitoyltransferase specific for Ras proteins (By similarity); related to ERF2 - protein involved in palmitoylation and localization of Ras2p
PDE_08134	GTP-binding nuclear protein GSP1/Ran
PDE_08414	Acetyl-coenzyme A synthetase FacA
PDE_02505	Heat shock protein Hsp30/Hsp42, putative
PDE_09914	V-type H+-transporting ATPase subunit A
PDE_02196	DNA damage-inducible protein 1; Acts as a linker between the 19S proteasome and polyubiquiti [...]
PDE_01008	Malate dehydrogenase, NAD-dependent
PDE_05805	ATPase family gene 2 protein
PDE_08175	Spindle pole body component alp14, - related to microtubule associated protein
PDE_09122	Ras-related protein Rab-1A; secretion related GTPase SrgB/Ypt1;

## Sheet: Original data
Group ID	Reference	PepCount	UniquePepCount	CoverPercent	MW	PI
	FileScan	Sequence	MH+	Diff(MH+)	Charge	Rank	Score	DeltaScore	ExpectValue	Ions	Reference	DIFF_MODIFIED_CANDIDATE	PI	MissCleavage	Modification	MatchedTIC	NumProteaseTermini	Engine	Tag	Decoy
1	tr|S8AIQ1|S8AIQ1_PENO1 DNA-directed RNA polymerase subunit OS=Penicillium oxalicum (strain 114-2 / CGMCC 5302) GN=PDE_00582 PE=3 SV=1	37	31	0.1747	191649	5.83
	R16065_9_7451_1,3645	K.DDYSPESR.G	968.396	0.00284	2	1	23.9	0	0.00448	0|0	S8AIQ1/H2CQG6		4.03	0		0	2	MASCOT		T
	R16065_9_7451_1,7475	K.DLNNAIQMAR.S	1145.57	0.00055	2	1	38.93	0	0.001	0|0	S8AIQ1/H2CQG6		5.84	0		0	2	MASCOT		T
	R16065_9_7451_1,2158	K.DSAPASEK.F	804.373	0.00064	2	1	22.86	0	0.0479	0|0	S8AIQ1/H2CQG6		4.37	0		0	2	MASCOT		T
	R16065_9_7451_1,9181	K.EDEEM*MQLPINVR.R	1619.74	0.00761	2	1	20.56	0	0.0708	0|0	S8AIQ1		4	0	15.994919 Oxidation (M)	0	2	MASCOT		T
	R16065_9_7451_1,10197	K.EDEEMMQLPINVR.R	1603.75	-0.0073	2	1	34.19	0	0.00488	0|0	S8AIQ1		4	0		0	2	MASCOT		T
	R16065_9_7451_1,8010	K.EILNVATNIK.T	1114.65	-0.0061	2	1	30.93	0	0.00722	0|0	S8AIQ1		6.1	0		0	2	MASCOT		T
	R16065_9_7451_1,3192	K.ESMMGHR.V	847.355	0.00218	2	1	38.35	0	0.000344	0|0	S8AIQ1		6.85	0		0	2	MASCOT		T
	R16065_9_7451_1,6247	K.GLTVQDVANR.I	1072.57	-0.00099	2	1	30.76	0	0.00596	0|0	S8AIQ1		5.84	0		0	2	MASCOT		T
	R16065_9_7451_1,4877	K.SMMEDDATAQPEK.K	1452.6	0.00537	2	1	49.86	0	8.78e-06	0|0	S8AIQ1		3.92	0		0	2	MASCOT		T
	R16065_9_7451_1,4593	K.TAETGYIQR.K	1038.52	-0.00033	2	1	35.85	0	0.00144	0|0	S8AIQ1		5.66	0		0	2	MASCOT		T
	R16065_9_7451_1,5483	K.TPSM*TVYQEGDNTYR.K	1777.77	-0.00297	2	1	41.8	0	0.000235	0|0	S8AIQ1		4.37	0	15.994919 Oxidation (M)	0	2	MASCOT		T
	R16065_9_7451_1,6693	K.TPSMTVYQEGDNTYR.K	1761.77	0.00212	2	1	66.35	0	1.03e-06	0|0	S8AIQ1		4.37	0		0	2	MASCOT		T
	R16065_9_7451_1,9969	K.YQPADGFGGLSPLGR.S	1534.76	0.00199	2	1	60.81	0	7.22e-06	0|0	S8AIQ1		5.84	0		0	2	MASCOT		T
	R16065_9_7451_1,4492	R.ADNGALMR.C	847.409	-0.00368	2	1	43.68	0	0.00081	0|0	S8AIQ1		5.88	0		0	2	MASCOT		T
	R16065_9_7451_1,10168	R.AELAELALVPK.N	1153.68	-0.01006	2	1	29.1	0	0.00388	0|0	S8AIQ1		4.53	0		0	2	MASCOT		T
	R16065_9_7451_1,5354	R.AFINER.G	749.394	-0.00048	2	1	24.7	0	0.0285	0|0	S8AIQ1		6.05	0		0	2	MASCOT		T
	R16065_9_7451_1,2249	R.ANQSVQR.C	802.417	-0.00013	2	1	25.3	0	0.0277	0|0	S8AIQ1		9.8	0		0	2	MASCOT		T
	R16065_9_7451_1,3220	R.CEQEGAPEHVTR.E	1412.62	-0.00109	3	1	27.18	0	0.00421	0|0	S8AIQ1		4.75	0		0	2	MASCOT		T
	R16065_9_7451_1,2519	R.DEAGSATER.G	935.406	0.00024	2	1	47.15	0	3.47e-05	0|0	S8AIQ1/H2CQG6		4.14	0		0	2	MASCOT		T
	R16065_9_7451_1,6805	R.EGLIDTAVK.T	945.525	0.00012	2	1	47.17	0	0.000218	0|0	S8AIQ1/S7Z466		4.37	0		0	2	MASCOT		T
	R16065_9_7451_1,8719	R.FALMGGVGAK.D	950.513	8e-05	2	1	45.29	0	0.000439	0|0	S8AIQ1		8.75	0		0	2	MASCOT		T
	R16065_9_7451_1,5953	R.FSPIAQGGAESPR.G	1316.66	-0.00011	2	1	38.72	0	0.00109	0|0	S8AIQ1		6	0		0	2	MASCOT		T
	R16065_9_7451_1,4901	R.GEDDLTYK.L	940.426	-0.00123	2	1	22.64	0	0.0161	0|0	S8AIQ1		4.03	0		0	2	MASCOT		T
	R16065_9_7451_1,4261	R.GVPGVER.A	713.394	-0.00011	2	1	22.25	0	0.0232	0|0	S8AIQ1		6	0		0	2	MASCOT		T
	R16065_9_7451_1,6352	R.GYLTPVTR.H	906.504	-0.00062	2	1	22.09	0	0.0485	0|0	S8AIQ1		8.75	0		0	2	MASCOT		T
	R16065_9_7451_1,4536	R.HFSPTSPASPTSPK.W	1440.71	-0.00095	2	1	37.51	0	0.00232	0|0	S8AIQ1		8.76	0		0	2	MASCOT		T
	R16065_9_7451_1,4613	R.HFSPTSPASPTSPK.W	1440.71	-0.00019	3	1	37.15	0	0.0012	0|0	S8AIQ1		8.76	0		0	2	MASCOT		T
	R16065_9_7451_1,4675	R.HFSPTSPASPTSPK.W	1440.71	-0.00095	2	1	73.42	0	5.94e-07	0|0	S8AIQ1		8.76	0		0	2	MASCOT		T
	R16065_9_7451_1,8652	R.HLDNGDVILFNR.Q	1412.73	-0.00464	2	1	23.88	0	0.06	0|0	S8AIQ1		5.21	0		0	2	MASCOT		T
	R16065_9_7451_1,4102	R.LGTIDR.Q	674.383	-0.00012	2	1	40.68	0	0.00147	0|0	S8AIQ1		5.84	0		0	2	MASCOT		T
	R16065_9_7451_1,3052	R.NISHEDVR.I	969.475	0.0021	2	1	30.52	0	0.00435	0|0	S8AIQ1		5.32	0		0	2	MASCOT		T
	R16065_9_7451_1,3065	R.NISHEDVR.I	969.475	-0.00063	3	1	36.61	0	0.00112	0|0	S8AIQ1		5.32	0		0	2	MASCOT		T
	R16065_9_7451_1,4937	R.SLVEHTSLR.S	1041.57	-2e-05	2	1	31.92	0	0.00325	0|0	S8AIQ1		6.47	0		0	2	MASCOT		T
	R16065_9_7451_1,4947	R.SLVEHTSLR.S	1041.57	0.00058	3	1	36.33	0	0.00134	0|0	S8AIQ1		6.47	0		0	2	MASCOT		T
	R16065_9_7451_1,2445	R.VDKDSAPASEK.F	1146.56	-0.0025	2	1	62.49	0	4.26e-06	0|0	S8AIQ1/H2CQG6		4.56	1		0	2	MASCOT		T
	R16065_9_7451_1,7179	R.VTEDGALLMSK.T	1163.6	0.00491	2	1	62.71	0	1.38e-05	0|0	S8AIQ1		4.37	0		0	2	MASCOT		T
	R16065_9_7451_1,4494	R.YFHGGCGNAQPTVR.K	1563.71	-0.00058	2	1	26.69	0	0.0234	0|0	S8AIQ1		8.23	0		0	2	MASCOT		T
2	tr|S7ZK10|S7ZK10_PENO1 DNA-directed RNA polymerase subunit beta OS=Penicillium oxalicum (strain 114-2 / CGMCC 5302) GN=PDE_05914 PE=3 SV=1	21	21	0.1355	141596	6.28
	R16065_9_7451_1,5649	K.AATLTGGLK.Y	831.493	0.00085	2	1	32.85	0	0.00501	0|0	S7ZK10/H2CQ22		8.8	0		0	2	MASCOT		T
	R16065_9_7451_1,5826	K.AGVSQVLSR.Y	916.521	0.00049	2	1	51.97	0	7.02e-05	0|0	S7ZK10/A0A075F834/A0A0A7CFF4/H2CQ22		9.8	0		0	2	MASCOT		T
	R16065_9_7451_1,2307	K.ESPEER.L	746.332	0.00039	2	1	31.25	0	0.000937	0|0	S7ZK10		4.25	0		0	2	MASCOT		T
	R16065_9_7451_1,3885	K.FVTEAR.E	722.383	-0.0013	2	1	23.52	0	0.0293	0|0	S7ZK10		6	0		0	2	MASCOT		T
	R16065_9_7451_1,6674	K.IDVSTPLR.S	900.515	0.00218	2	1	22.43	0	0.0631	0|0	S7ZK10		5.84	0		0	2	MASCOT		T
	R16065_9_7451_1,4871	K.IFTDAGR.V	779.405	-0.00809	2	1	25.15	0	0.0675	0|0	S7ZK10/A0A075F834/A0A0A7CFF4/H2CQ22		5.84	0		0	2	MASCOT		T
	R16065_9_7451_1,3569	K.KFVTEAR.E	850.478	0.00539	2	1	23.4	0	0.0569	0|0	S7ZK10		8.75	1		0	2	MASCOT		T
	R16065_9_7451_1,7095	K.LDDDGIVAPGVR.V	1226.64	-0.00293	2	1	38.92	0	0.000769	0|0	S7ZK10		3.93	0		0	2	MASCOT		T
	R16065_9_7451_1,4678	K.SETIGMR.K	793.387	-0.00547	2	1	27.02	0	0.0377	0|0	S7ZK10		5.72	0		0	2	MASCOT		T
	R16065_9_7451_1,7407	K.VAPLAPDAEELGQR.T	1465.76	-0.00045	2	1	65.57	0	2.44e-06	0|0	S7ZK10		4.14	0		0	2	MASCOT		T
	R16065_9_7451_1,2895	R.ADDEAADADDENK.E	1378.52	0.00016	2	1	31.7	0	0.000101	0|0	S7ZK10		3.57	0		0	2	MASCOT		T
	R16065_9_7451_1,2924	R.ADDEAADADDENKER.G	1663.67	-0.00497	2	1	42.57	0	5.81e-05	0|0	S7ZK10		3.8	1		0	2	MASCOT		T
	R16065_9_7451_1,2273	R.EHGYQSR.G	876.396	0.00028	2	1	27.82	0	0.00347	0|0	S7ZK10		6.85	0		0	2	MASCOT		T
	R16065_9_7451_1,10301	R.EQGFGWDGLVR.S	1263.61	-0.00135	2	1	36.94	0	0.00135	0|0	S7ZK10/A0A075F834/A0A0A7CFF4/H2CQ22		4.37	0		0	2	MASCOT		T
	R16065_9_7451_1,4868	R.FGEMER.D	768.334	0.00036	2	1	23.8	0	0.00542	0|0	S7ZK10		4.53	0		0	2	MASCOT		T
	R16065_9_7451_1,2549	R.GSSQSNLNHER.R	1228.57	0.0005	2	1	74.7	0	1.07e-07	0|0	S7ZK10		6.75	0		0	2	MASCOT		T
	R16065_9_7451_1,8665	R.SAGNIVQVFK.K	1062.59	0.0015	2	1	32.56	0	0.00652	0|0	S7ZK10		8.47	0		0	2	MASCOT		T
	R16065_9_7451_1,8178	R.SMEFLR.F	782.387	-0.00053	2	1	23.31	0	0.0149	0|0	S7ZK10		5.72	0		0	2	MASCOT		T
	R16065_9_7451_1,3479	R.TNTPIGR.D	758.416	0.0028	2	1	33.1	0	0.00722	0|0	S7ZK10/A0A075F834/A0A0A7CFF4/H2CQ22		9.41	0		0	2	MASCOT		T
	R16065_9_7451_1,2682	R.TYTDSEK.T	843.373	0.00032	2	1	40.09	0	0.000519	0|0	S7ZK10		4.37	0		0	2	MASCOT		T
	R16065_9_7451_1,8735	R.YTFASSLSHLR.R	1281.66	-0.00039	2	1	20.82	0	0.0542	0|0	S7ZK10/A0A075F834/A0A0A7CFF4/H2CQ22		8.75	0		0	2	MASCOT		T
3	tr|S7ZUR0|S7ZUR0_PENO1 Uncharacterized protein OS=Penicillium oxalicum (strain 114-2 / CGMCC 5302) GN=PDE_07451 PE=4 SV=1	86	19	0.4853	41168.4	6.31
	R16065_9_7451_1,4770	-.M*AEGPQLTGLAQSSGQATQPSQSLK.I	2531.24	-0.03485	3	1	37.67	0	0.00371	0|0	S7ZUR0		5.75	0	15.994919 Oxidation (M)	0	2	MASCOT		T
	R16065_9_7451_1,4954	K.AFLTGK.S	636.372	0.00015	2	1	22.58	0	0.0271	0|0	S7ZUR0		8.8	0		0	2	MASCOT		T
	R16065_9_7451_1,5818	K.AFLTGK.S	636.372	0.00015	2	1	33.01	0	0.00245	0|0	S7ZUR0		8.8	0		0	2	MASCOT		T
	R16065_9_7451_1,6053	K.AFLTGK.S	636.372	-0.00013	2	1	31.15	0	0.00376	0|0	S7ZUR0		8.8	0		0	2	MASCOT		T
	R16065_9_7451_1,6270	K.AFLTGK.S	636.372	-0.00119	2	1	23.64	0	0.0467	0|0	S7ZUR0		8.8	0		0	2	MASCOT		T
	R16065_9_7451_1,9185	K.DDTVTVWDLGSR.N	1363.65	0.00126	2	1	31.24	0	0.0047	0|0	S7ZUR0		3.93	0		0	2	MASCOT		T
	R16065_9_7451_1,9339	K.DDTVTVWDLGSR.N	1363.65	0.00046	2	1	53.01	0	3.2e-05	0|0	S7ZUR0		3.93	0		0	2	MASCOT		T
	R16065_9_7451_1,9996	K.DDTVTVWDLGSR.N	1363.65	0.00178	2	1	61.67	0	4.08e-06	0|0	S7ZUR0		3.93	0		0	2	MASCOT		T
	R16065_9_7451_1,10029	K.DDTVTVWDLGSR.N	1363.65	0.00035	3	1	36.41	0	0.00146	0|0	S7ZUR0		3.93	0		0	2	MASCOT		T
	R16065_9_7451_1,10159	K.DDTVTVWDLGSR.N	1363.65	0.00026	2	1	66.67	0	1.38e-06	0|0	S7ZUR0		3.93	0		0	2	MASCOT		T
	R16065_9_7451_1,5043	K.ISDVIR.S	702.414	-9e-05	2	1	26.34	0	0.0329	0|0	S7ZUR0		5.84	0		0	2	MASCOT		T
	R16065_9_7451_1,5186	K.ISDVIR.S	702.414	0.00045	2	1	33.49	0	0.00634	0|0	S7ZUR0		5.84	0		0	2	MASCOT		T
	R16065_9_7451_1,5337	K.ISDVIR.S	702.414	0.00041	2	1	34.79	0	0.0047	0|0	S7ZUR0		5.84	0		0	2	MASCOT		T
	R16065_9_7451_1,5506	K.ISDVIR.S	702.414	0.00173	2	1	31.07	0	0.0134	0|0	S7ZUR0		5.84	0		0	2	MASCOT		T
	R16065_9_7451_1,6176	K.ISDVIR.S	702.414	9e-05	2	1	34.47	0	0.00506	0|0	S7ZUR0		5.84	0		0	2	MASCOT		T
	R16065_9_7451_1,4137	K.KYGVHLAR.F	943.547	-0.00553	2	1	23.44	0	0.0707	0|0	S7ZUR0		9.99	1		0	2	MASCOT		T
	R16065_9_7451_1,2195	K.STKSVPSK.K	833.473	0.00052	2	1	45.84	0	0.00021	0|0	S7ZUR0		10	1		0	2	MASCOT		T
	R16065_9_7451_1,2836	K.VDHSLR.L	726.389	-0.00047	2	1	31.34	0	0.00242	0|0	S7ZUR0		6.71	0		0	2	MASCOT		T
	R16065_9_7451_1,2991	K.VDHSLR.L	726.389	1e-05	2	1	34.27	0	0.00123	0|0	S7ZUR0		6.71	0		0	2	MASCOT		T
	R16065_9_7451_1,3146	K.VDHSLR.L	726.389	-0.00013	2	1	23.94	0	0.0133	0|0	S7ZUR0		6.71	0		0	2	MASCOT		T
	R16065_9_7451_1,3505	K.VDHSLR.L	726.389	0.00141	2	1	21.29	0	0.0241	0|0	S7ZUR0		6.71	0		0	2	MASCOT		T
	R16065_9_7451_1,3655	K.VDHSLR.L	726.389	-0.00341	2	1	29.11	0	0.0123	0|0	S7ZUR0		6.71	0		0	2	MASCOT		T
	R16065_9_7451_1,4980	K.VDHSLR.L	726.389	-0.00341	2	1	30.59	0	0.00873	0|0	S7ZUR0		6.71	0		0	2	MASCOT		T
	R16065_9_7451_1,7703	K.VTCLAM*SPGSDAFISCSK.D	1946.87	-0.00037	2	1	112.58	0	1.27e-11	0|0	S7ZUR0		5.79	0	15.994919 Oxidation (M)	0	2	MASCOT		T
	R16065_9_7451_1,7718	K.VTCLAM*SPGSDAFISCSK.D	1946.87	0.00101	3	1	25.57	0	0.00624	0|0	S7ZUR0		5.79	0	15.994919 Oxidation (M)	0	2	MASCOT		T
	R16065_9_7451_1,7881	K.VTCLAM*SPGSDAFISCSK.D	1946.87	0.01293	2	1	76.17	0	6.4e-08	0|0	S7ZUR0		5.79	0	15.994919 Oxidation (M)	0	2	MASCOT		T
	R16065_9_7451_1,8681	K.VTCLAM*SPGSDAFISCSK.D	1946.87	-0.00317	2	1	25.02	0	0.00818	0|0	S7ZUR0		5.79	0	15.994919 Oxidation (M)	0	2	MASCOT		T
	R16065_9_7451_1,8960	K.VTCLAMSPGSDAFISCSK.D	1930.87	-0.0015	2	1	69.95	0	2.98e-07	0|0	S7ZUR0		5.79	0		0	2	MASCOT		T
	R16065_9_7451_1,9134	K.VTCLAMSPGSDAFISCSK.D	1930.87	-0.00068	2	1	80.14	0	2.86e-08	0|0	S7ZUR0		5.79	0		0	2	MASCOT		T
	R16065_9_7451_1,5001	K.YGVHLAR.F	815.452	-0.00037	2	1	35.78	0	0.00247	0|0	S7ZUR0		8.75	0		0	2	MASCOT		T
	R16065_9_7451_1,5139	K.YGVHLAR.F	815.452	0.00023	2	1	34.46	0	0.00335	0|0	S7ZUR0		8.75	0		0	2	MASCOT		T
	R16065_9_7451_1,5281	K.YGVHLAR.F	815.452	0.00065	2	1	33.72	0	0.00397	0|0	S7ZUR0		8.75	0		0	2	MASCOT		T
	R16065_9_7451_1,5449	K.YGVHLAR.F	815.452	0.00059	2	1	28.83	0	0.0122	0|0	S7ZUR0		8.75	0		0	2	MASCOT		T
	R16065_9_7451_1,7303	M.AEGPQLTGLAQSSGQATQPSQSLK.I	2384.21	-0.00753	2	1	22.07	0	0.103	0|0	S7ZUR0		6.05	0		0	2	MASCOT		T
	R16065_9_7451_1,6089	R.AAPISTTGKPLGQGDACFTTDGR.F	2321.12	-0.01911	4	1	22.53	0	0.038	0|0	S7ZUR0		6	0		0	2	MASCOT		T
	R16065_9_7451_1,6802	R.AAPISTTGKPLGQGDACFTTDGR.F	2321.12	-0.00033	3	1	69.54	0	6.67e-07	0|0	S7ZUR0		6	0		0	2	MASCOT		T
	R16065_9_7451_1,6838	R.AAPISTTGKPLGQGDACFTTDGR.F	2321.12	-0.00274	2	1	117.29	0	1.14e-11	0|0	S7ZUR0		6	0		0	2	MASCOT		T
	R16065_9_7451_1,7141	R.AAPISTTGKPLGQGDACFTTDGR.F	2321.12	0.0099	3	1	26.02	0	0.0136	0|0	S7ZUR0		6	0		0	2	MASCOT		T
	R16065_9_7451_1,3009	R.FTHHSR.Q	784.385	-0.00782	2	1	26.21	0	0.0257	0|0	S7ZUR0		9.76	0		0	2	MASCOT		T
	R16065_9_7451_1,4315	R.LEFSNDGK.Y	909.431	0.00012	2	1	20.52	0	0.0435	0|0	S7ZUR0		4.37	0		0	2	MASCOT		T
	R16065_9_7451_1,5064	R.LEFSNDGK.Y	909.431	-0.00024	2	1	42.27	0	0.000291	0|0	S7ZUR0		4.37	0		0	2	MASCOT		T
	R16065_9_7451_1,5203	R.LEFSNDGK.Y	909.431	-0.00092	2	1	39.86	0	0.000532	0|0	S7ZUR0		4.37	0		0	2	MASCOT		T
	R16065_9_7451_1,5357	R.LEFSNDGK.Y	909.431	-0.00018	2	1	35.74	0	0.00131	0|0	S7ZUR0		4.37	0		0	2	MASCOT		T
	R16065_9_7451_1,5516	R.LEFSNDGK.Y	909.431	-0.0007	2	1	38.04	0	0.000809	0|0	S7ZUR0		4.37	0		0	2	MASCOT		T
	R16065_9_7451_1,5834	R.LEFSNDGK.Y	909.431	-0.0015	2	1	29.47	0	0.0186	0|0	S7ZUR0		4.37	0		0	2	MASCOT		T
	R16065_9_7451_1,6285	R.LEFSNDGK.Y	909.431	-0.0015	2	1	32.24	0	0.00982	0|0	S7ZUR0		4.37	0		0	2	MASCOT		T
	R16065_9_7451_1,7281	R.LLDLHNEGYVR.Y	1328.7	0.00011	3	1	41.5	0	0.000545	0|0	S7ZUR0		5.32	0		0	2	MASCOT		T
	R16065_9_7451_1,7434	R.LLDLHNEGYVR.Y	1328.7	-0.00104	2	1	64.55	0	2.65e-06	0|0	S7ZUR0		5.32	0		0	2	MASCOT		T
	R16065_9_7451_1,7462	R.LLDLHNEGYVR.Y	1328.7	-0.00148	3	1	34.48	0	0.00255	0|0	S7ZUR0		5.32	0		0	2	MASCOT		T
	R16065_9_7451_1,7613	R.LLDLHNEGYVR.Y	1328.7	0.0011	2	1	62.79	0	4.02e-06	0|0	S7ZUR0		5.32	0		0	2	MASCOT		T
	R16065_9_7451_1,7977	R.LLDLHNEGYVR.Y	1328.7	0.00038	2	1	45.47	0	0.000219	0|0	S7ZUR0		5.32	0		0	2	MASCOT		T
	R16065_9_7451_1,4927	R.QANVSLQPAAR.L	1154.63	0.00022	2	1	55.86	0	1.32e-05	0|0	S7ZUR0		9.75	0		0	2	MASCOT		T
	R16065_9_7451_1,4973	R.QANVSLQPAAR.L	1154.63	-9e-05	3	1	33.59	0	0.00223	0|0	S7ZUR0		9.75	0		0	2	MASCOT		T
	R16065_9_7451_1,5088	R.QANVSLQPAAR.L	1154.63	0.00062	2	1	69.22	0	5.98e-07	0|0	S7ZUR0		9.75	0		0	2	MASCOT		T
	R16065_9_7451_1,5632	R.QANVSLQPAAR.L	1154.63	-0.0051	2	1	41.45	0	0.000673	0|0	S7ZUR0		9.75	0		0	2	MASCOT		T
	R16065_9_7451_1,5783	R.QANVSLQPAAR.L	1154.63	-0.0051	2	1	31.16	0	0.0072	0|0	S7ZUR0		9.75	0		0	2	MASCOT		T
	R16065_9_7451_1,6303	R.QANVSLQPAAR.L	1154.63	0.003	2	1	59.11	0	6.75e-06	0|0	S7ZUR0		9.75	0		0	2	MASCOT		T
	R16065_9_7451_1,6458	R.QANVSLQPAAR.L	1154.63	-0.0051	2	1	35.85	0	0.00244	0|0	S7ZUR0		9.75	0		0	2	MASCOT		T
	R16065_9_7451_1,2771	R.QVLHASTK.V	883.5	-0.00062	2	1	43	0	0.000178	0|0	S7ZUR0		8.76	0		0	2	MASCOT		T
	R16065_9_7451_1,2916	R.QVLHASTK.V	883.5	-4e-05	2	1	37.55	0	0.000633	0|0	S7ZUR0		8.76	0		0	2	MASCOT		T
	R16065_9_7451_1,3071	R.QVLHASTK.V	883.5	0.00686	2	1	39.68	0	0.00133	0|0	S7ZUR0		8.76	0		0	2	MASCOT		T
	R16065_9_7451_1,6842	R.TALIEYNPR.Y	1076.57	-0.00127	2	1	26.62	0	0.0206	0|0	S7ZUR0		5.66	0		0	2	MASCOT		T
	R16065_9_7451_1,6956	R.TALIEYNPR.Y	1076.57	-0.00023	3	1	41.61	0	0.000635	0|0	S7ZUR0		5.66	0		0	2	MASCOT		T
	R16065_9_7451_1,7017	R.TALIEYNPR.Y	1076.57	-0.00435	2	1	48.12	0	0.000146	0|0	S7ZUR0		5.66	0		0	2	MASCOT		T
	R16065_9_7451_1,7049	R.TALIEYNPR.Y	1076.57	-0.00375	2	1	28.88	0	0.0124	0|0	S7ZUR0		5.66	0		0	2	MASCOT		T
	R16065_9_7451_1,7185	R.TALIEYNPR.Y	1076.57	-0.00027	2	1	40.65	0	0.000792	0|0	S7ZUR0		5.66	0		0	2	MASCOT		T
	R16065_9_7451_1,7355	R.TALIEYNPR.Y	1076.57	-0.00297	2	1	42.43	0	0.00054	0|0	S7ZUR0		5.66	0		0	2	MASCOT		T
	R16065_9_7451_1,7676	R.TALIEYNPR.Y	1076.57	0.00027	2	1	31.57	0	0.00686	0|0	S7ZUR0		5.66	0		0	2	MASCOT		T
	R16065_9_7451_1,8021	R.TALIEYNPR.Y	1076.57	0.00073	2	1	29.24	0	0.0196	0|0	S7ZUR0		5.66	0		0	2	MASCOT		T
	R16065_9_7451_1,3212	R.YFSGHTDK.V	954.432	0.00011	3	1	23.51	0	0.0147	0|0	S7ZUR0		6.74	0		0	2	MASCOT		T
	R16065_9_7451_1,3308	R.YFSGHTDK.V	954.432	-0.00029	2	1	32.61	0	0.00181	0|0	S7ZUR0		6.74	0		0	2	MASCOT		T
	R16065_9_7451_1,3437	R.YFSGHTDK.V	954.432	-0.00047	2	1	32.66	0	0.00179	0|0	S7ZUR0		6.74	0		0	2	MASCOT		T
	R16065_9_7451_1,3579	R.YFSGHTDK.V	954.432	-0.00111	2	1	23.12	0	0.0156	0|0	S7ZUR0		6.74	0		0	2	MASCOT		T
	R16065_9_7451_1,3287	R.YHM*IASADR.D	1079.49	0.00019	3	1	24.21	0	0.0142	0|0	S7ZUR0		6.74	0	15.994919 Oxidation (M)	0	2	MASCOT		T
	R16065_9_7451_1,3292	R.YHM*IASADR.D	1079.49	0.00111	2	1	24.86	0	0.0325	0|0	S7ZUR0		6.74	0	15.994919 Oxidation (M)	0	2	MASCOT		T
	R16065_9_7451_1,3421	R.YHM*IASADR.D	1079.49	0.00838	3	1	23.24	0	0.0121	0|0	S7ZUR0		6.74	0	15.994919 Oxidation (M)	0	2	MASCOT		T
	R16065_9_7451_1,3425	R.YHM*IASADR.D	1079.49	-0.00013	2	1	25.26	0	0.0112	0|0	S7ZUR0		6.74	0	15.994919 Oxidation (M)	0	2	MASCOT		T
	R16065_9_7451_1,4618	R.YHMIASADR.D	1063.5	3e-05	2	1	29.02	0	0.00627	0|0	S7ZUR0		6.74	0		0	2	MASCOT		T
	R16065_9_7451_1,4624	R.YHMIASADR.D	1063.5	0.0002	3	1	46.25	0	9.6e-05	0|0	S7ZUR0		6.74	0		0	2	MASCOT		T
	R16065_9_7451_1,4761	R.YHMIASADR.D	1063.5	-0.00121	2	1	20.35	0	0.0471	0|0	S7ZUR0		6.74	0		0	2	MASCOT		T
	R16065_9_7451_1,4767	R.YHMIASADR.D	1063.5	5e-05	3	1	41.31	0	0.00037	0|0	S7ZUR0		6.74	0		0	2	MASCOT		T
	R16065_9_7451_1,4971	R.YHMIASADR.D	1063.5	-0.00043	2	1	41.05	0	0.000393	0|0	S7ZUR0		6.74	0		0	2	MASCOT		T
	R16065_9_7451_1,5112	R.YHMIASADR.D	1063.5	0.00619	2	1	26.29	0	0.0257	0|0	S7ZUR0		6.74	0		0	2	MASCOT		T
	R16065_9_7451_1,5265	R.YHMIASADR.D	1063.5	7e-05	2	1	25.62	0	0.0137	0|0	S7ZUR0		6.74	0		0	2	MASCOT		T
	R16065_9_7451_1,6135	R.YHMIASADR.D	1063.5	-0.00185	2	1	24.06	0	0.02	0|0	S7ZUR0		6.74	0		0	2	MASCOT		T
	R16065_9_7451_1,6911	R.YHMIASADR.D	1063.5	-0.00189	2	1	41.07	0	0.000399	0|0	S7ZUR0		6.74	0		0	2	MASCOT		T
4	tr|S7ZL30|S7ZL30_PENO1 Uncharacterized protein OS=Penicillium oxalicum (strain 114-2 / CGMCC 5302) GN=PDE_04315 PE=3 SV=1	18	16	0.2806	61907	5.52
	R16065_9_7451_1,4286	K.APGFGDNR.K	833.39	-0.00268	2	1	39.78	0	0.00162	0|0	S7ZL30		5.88	0		0	2	MASCOT		T
	R16065_9_7451_1,4528	K.AVTSTLGPK.G	873.504	0.00051	2	1	47.4	0	0.000253	0|0	S7ZL30		8.8	0		0	2	MASCOT		T
	R16065_9_7451_1,3299	K.DGVTVAK.A	689.383	0.01012	2	1	39.9	0	0.00288	0|0	S7ZL30		5.84	0		0	2	MASCOT		T
	R16065_9_7451_1,2611	K.DNISQR.C	732.363	-0.00925	2	1	26.32	0	0.0407	0|0	S7ZL30		5.84	0		0	2	MASCOT		T
	R16065_9_7451_1,6581	K.EDTIILNGEGSK.D	1275.64	-0.00292	2	1	45.56	0	0.000231	0|0	S7ZL30		4.14	0		0	2	MASCOT		T
	R16065_9_7451_1,5179	K.EGVITVK.E	745.445	0.00149	2	1	36.27	0	0.00297	0|0	S7ZL30		6.1	0		0	2	MASCOT		T
	R16065_9_7451_1,6054	K.LSGGVAVIK.V	843.53	-0.0029	2	1	37.23	0	0.00146	0|0	S7ZL30		8.75	0		0	2	MASCOT		T
	R16065_9_7451_1,5662	K.LTDEFAK.D	823.42	1e-05	2	1	25.69	0	0.0167	0|0	S7ZL30		4.37	0		0	2	MASCOT		T
	R16065_9_7451_1,7080	K.NVAAGCNPMDLR.R	1317.6	-0.00068	2	1	33.03	0	0.00192	0|0	S7ZL30		5.83	0		0	2	MASCOT		T
	R16065_9_7451_1,7241	K.TNELAGDGTTTATVLGR.A	1676.84	-0.00034	2	1	76.65	0	1.73e-07	0|0	S7ZL30		4.37	0		0	2	MASCOT		T
	R16065_9_7451_1,7428	K.TNELAGDGTTTATVLGR.A	1676.84	-0.00774	2	1	24.36	0	0.0482	0|0	S7ZL30		4.37	0		0	2	MASCOT		T
	R16065_9_7451_1,10250	K.VEFEKPLILLSEK.K	1544.89	-0.00075	3	1	21.19	0	0.0289	0|0	S7ZL30		4.79	0		0	2	MASCOT		T
	R16065_9_7451_1,4606	K.VGGASEVEVGEK.K	1160.58	0.00146	2	1	50.56	0	5.89e-05	0|0	S7ZL30		4.25	0		0	2	MASCOT		T
	R16065_9_7451_1,5412	R.GQLQVAAVK.A	913.547	-0.00055	2	1	39.06	0	0.00059	0|0	S7ZL30		8.75	0		0	2	MASCOT		T
	R16065_9_7451_1,5570	R.GVMADPSTSEYEK.E	1413.62	0.0075	2	1	58.6	0	4.9e-06	0|0	S7ZL30		4.14	0		0	2	MASCOT		T
	R16065_9_7451_1,8932	R.GYTSPYFITDPK.S	1388.67	0.00054	2	1	23.33	0	0.0574	0|0	S7ZL30		5.83	0		0	2	MASCOT		T
	R16065_9_7451_1,7640	R.NVLIESPYGSPK.I	1303.69	0.00346	2	1	54.85	0	3.62e-05	0|0	S7ZL30		6	0		0	2	MASCOT		T
	R16065_9_7451_1,7819	R.NVLIESPYGSPK.I	1303.69	0.00282	2	1	27.32	0	0.0186	0|0	S7ZL30		6	0		0	2	MASCOT		T
5	tr|S8AZ69|S8AZ69_PENO1 Uncharacterized protein OS=Penicillium oxalicum (strain 114-2 / CGMCC 5302) GN=PDE_02230 PE=4 SV=1	17	16	0.3406	52476.9	6.35
	R16065_9_7451_1,10192	K.GQDPELAALDFR.N	1331.66	0.00627	2	1	28.58	0	0.0296	0|0	S8AZ69		4.03	0		0	2	MASCOT		T
	R16065_9_7451_1,7767	K.GVVAVLDATNSTK.E	1274.7	-0.00082	2	1	31.36	0	0.00603	0|0	S8AZ69		5.84	0		0	2	MASCOT		T
	R16065_9_7451_1,5277	K.HQDFPAEGAEGAAATGAH.-	1736.76	-0.00103	2	1	97.11	0	2.92e-10	0|0	S8AZ69		4.63	0		0	2	MASCOT		T
	R16065_9_7451_1,5283	K.HQDFPAEGAEGAAATGAH.-	1736.76	-0.0071	3	1	60.93	0	1.61e-06	0|0	S8AZ69		4.63	0		0	2	MASCOT		T
	R16065_9_7451_1,4354	K.IGGDANISER.G	1031.51	-9e-05	2	1	53.94	0	2.72e-05	0|0	S8AZ69		4.37	0		0	2	MASCOT		T
	R16065_9_7451_1,9941	K.IVIWTSTLK.R	1060.64	0.00738	2	1	25.09	0	0.0121	0|0	S8AZ69		8.75	0		0	2	MASCOT		T
	R16065_9_7451_1,3027	K.TTSPDYK.G	811.383	0.00262	2	1	24.95	0	0.0101	0|0	S8AZ69		5.5	0		0	2	MASCOT		T
	R16065_9_7451_1,6398	K.VFMASSEDYK.I	1176.52	0.00011	2	1	37.43	0	0.000361	0|0	S8AZ69		4.37	0		0	2	MASCOT		T
	R16065_9_7451_1,7081	K.VFNVGSYR.R	941.484	-0.00878	2	1	22.66	0	0.102	0|0	S8AZ69		8.72	0		0	2	MASCOT		T
	R16065_9_7451_1,6034	K.YPEDFAAR.D	968.447	-0.00552	2	1	27.3	0	0.0137	0|0	S8AZ69		4.37	0		0	2	MASCOT		T
	R16065_9_7451_1,5172	R.AYGTEELR.F	938.458	0.00504	2	1	41.13	0	0.000786	0|0	S8AZ69		4.53	0		0	2	MASCOT		T
	R16065_9_7451_1,3797	R.DEDKYNYR.Y	1102.48	-0.00066	2	1	32.9	0	0.000872	0|0	S8AZ69		4.56	1		0	2	MASCOT		T
	R16065_9_7451_1,2826	R.GEAYAR.K	666.321	-0.00049	2	1	22.96	0	0.0235	0|0	S8AZ69		6	0		0	2	MASCOT		T
	R16065_9_7451_1,2658	R.GGESYR.D	668.3	0.00709	2	1	39.39	0	0.00046	0|0	S8AZ69		6	0		0	2	MASCOT		T
	R16065_9_7451_1,6209	R.HGESEFNLTGK.I	1218.57	-0.00013	2	1	59.85	0	4.24e-06	0|0	S8AZ69		5.4	0		0	2	MASCOT		T
	R16065_9_7451_1,9256	R.NYELVYQTIDDDEK.N	1744.79	-0.00254	2	1	77.64	0	5.34e-08	0|0	S8AZ69		3.77	0		0	2	MASCOT		T
	R16065_9_7451_1,2735	R.QSGVPANTK.I	901.474	-0.00188	2	1	31.06	0	0.0058	0|0	S8AZ69		8.75	0		0	2	MASCOT		T
6	tr|S8AYL2|S8AYL2_PENO1 Uncharacterized protein OS=Penicillium oxalicum (strain 114-2 / CGMCC 5302) GN=PDE_02013 PE=4 SV=1	16	16	0.1408	128366	6.71
	R16065_9_7451_1,7416	K.ASLVAFK.D	735.44	0.00722	2	1	30.7	0	0.0112	0|0	S8AYL2		8.8	0		0	2	MASCOT		T
	R16065_9_7451_1,9028	K.ELAQNILDNAAASTK.R	1558.81	0.00156	2	1	74.49	0	3.43e-07	0|0	S8AYL2		4.37	0		0	2	MASCOT		T
	R16065_9_7451_1,6633	K.GDSPAAEIAGVK.R	1114.57	-0.00064	2	1	36.44	0	0.00155	0|0	S8AYL2		4.37	0		0	2	MASCOT		T
	R16065_9_7451_1,2962	K.LGTTNAER.K	861.442	-0.00013	2	1	53.48	0	4.38e-05	0|0	S8AYL2		6	0		0	2	MASCOT		T
	R16065_9_7451_1,8099	K.QSVFLYR.R	912.494	-0.00017	2	1	51.85	0	2.87e-05	0|0	S8AYL2		8.75	0		0	2	MASCOT		T
	R16065_9_7451_1,2811	K.RGGDEQPVSAEK.A	1272.62	0.00513	2	1	60.65	0	1.03e-05	0|0	S8AYL2		4.68	1		0	2	MASCOT		T
	R16065_9_7451_1,4500	K.SSPAPTGPIK.R	954.525	-0.00054	2	1	28.87	0	0.00733	0|0	S8AYL2		8.47	0		0	2	MASCOT		T
	R16065_9_7451_1,2220	K.TAENQGENEK.A	1119.49	0.00019	2	1	49.92	0	1.58e-05	0|0	S8AYL2		4.25	0		0	2	MASCOT		T
	R16065_9_7451_1,5318	K.TTNFIK.R	723.404	-0.00916	2	1	21.61	0	0.106	0|0	S8AYL2		8.41	0		0	2	MASCOT		T
	R16065_9_7451_1,8082	K.VISTTFETGHPVIIEK.L	1770.96	0.01091	2	1	69.63	0	1.13e-06	0|0	S8AYL2		5.4	0		0	2	MASCOT		T
	R16065_9_7451_1,2687	R.DNEGQPQPATK.R	1184.55	0.00015	2	1	24.88	0	0.0133	0|0	S8AYL2		4.37	0		0	2	MASCOT		T
	R16065_9_7451_1,8576	R.FVTVDEEMLQK.T	1338.66	0.00825	2	1	23.98	0	0.0468	0|0	S8AYL2		4.14	0		0	2	MASCOT		T
	R16065_9_7451_1,3101	R.GGDEQPVSAEK.A	1116.52	-0.00115	2	1	56.64	0	5.64e-06	0|0	S8AYL2		4.14	0		0	2	MASCOT		T
	R16065_9_7451_1,3293	R.HQQQTQPPQQQPPSRPQPQR.T	2391.2	-0.01571	4	1	31.97	0	0.00531	0|0	S8AYL2		12	0		0	2	MASCOT		T
	R16065_9_7451_1,3581	R.SSQPQQPPQPQPSR.L	1561.77	-0.00098	2	1	21.84	0	0.133	0|0	S8AYL2		9.47	0		0	2	MASCOT		T
	R16065_9_7451_1,7670	R.TINMFR.Q	781.403	0.00045	2	1	28.9	0	0.00567	0|0	S8AYL2		9.41	0		0	2	MASCOT		T
7	tr|S8B1N5|S8B1N5_PENO1 Putative cAMP dependent protein kinase A catalytic subunit OS=Penicillium oxalicum (strain 114-2 / CGMCC 5302) GN=PDE_03213 PE=3 SV=1	46	14	0.2466	50098.5	7.39
	R16065_9_7451_1,9739	K.DIDAPYIPPIR.G	1269.68	-4e-05	2	1	62.6	0	3.54e-06	0|0	S8B1N5		4.21	0		0	2	MASCOT		T
	R16065_9_7451_1,9888	K.DIDAPYIPPIR.G	1269.68	-0.00058	2	1	45.77	0	0.000166	0|0	S8B1N5		4.21	0		0	2	MASCOT		T
	R16065_9_7451_1,10049	K.DIDAPYIPPIR.G	1269.68	-0.00386	2	1	22.56	0	0.0322	0|0	S8B1N5		4.21	0		0	2	MASCOT		T
	R16065_9_7451_1,10300	K.DIDAPYIPPIR.G	1269.68	-0.00078	2	1	46.3	0	0.000147	0|0	S8B1N5		4.21	0		0	2	MASCOT		T
	R16065_9_7451_1,8172	K.GKYSQEDFLLQR.T	1483.75	0.00123	2	1	40.5	0	0.00194	0|0	S8B1N5		6.07	1		0	2	MASCOT		T
	R16065_9_7451_1,8338	K.ITDFGFAK.E	898.467	0.00084	2	1	31.79	0	0.00265	0|0	S8B1N5		5.84	0		0	2	MASCOT		T
	R16065_9_7451_1,8505	K.ITDFGFAK.E	898.467	2e-05	2	1	31.87	0	0.00257	0|0	S8B1N5		5.84	0		0	2	MASCOT		T
	R16065_9_7451_1,8664	K.ITDFGFAK.E	898.467	0.0002	2	1	25.17	0	0.0122	0|0	S8B1N5		5.84	0		0	2	MASCOT		T
	R16065_9_7451_1,10925	K.ITDFGFAK.E	898.467	-0.00016	2	1	30.58	0	0.00324	0|0	S8B1N5		5.84	0		0	2	MASCOT		T
	R16065_9_7451_1,7686	K.IYENILR.G	920.52	0.00075	2	1	27.24	0	0.0134	0|0	S8B1N5		6	0		0	2	MASCOT		T
	R16065_9_7451_1,7859	K.IYENILR.G	920.52	0.00027	2	1	32.41	0	0.00408	0|0	S8B1N5		6	0		0	2	MASCOT		T
	R16065_9_7451_1,2455	K.QIEHTNDER.R	1141.52	-0.0095	2	1	43.24	0	0.000567	0|0	S8B1N5		4.65	0		0	2	MASCOT		T
	R16065_9_7451_1,2461	K.QIEHTNDER.R	1141.52	0.00029	3	1	30.27	0	0.00315	0|0	S8B1N5		4.65	0		0	2	MASCOT		T
	R16065_9_7451_1,9063	K.YSQEDFLLQR.T	1298.64	0.00056	2	1	74.71	0	1.89e-07	0|0	S8B1N5		4.37	0		0	2	MASCOT		T
	R16065_9_7451_1,9218	K.YSQEDFLLQR.T	1298.64	0.00032	2	1	70.07	0	5.51e-07	0|0	S8B1N5		4.37	0		0	2	MASCOT		T
	R16065_9_7451_1,9367	K.YSQEDFLLQR.T	1298.64	0.00018	2	1	53.38	0	2.57e-05	0|0	S8B1N5		4.37	0		0	2	MASCOT		T
	R16065_9_7451_1,9842	K.YSQEDFLLQR.T	1298.64	0.00168	2	1	46.33	0	0.000126	0|0	S8B1N5		4.37	0		0	2	MASCOT		T
	R16065_9_7451_1,10186	K.YSQEDFLLQR.T	1298.64	0.00026	2	1	74.38	0	2.04e-07	0|0	S8B1N5		4.37	0		0	2	MASCOT		T
	R16065_9_7451_1,9406	R.DLKPENLLLDR.H	1325.74	-0.00069	3	1	48.14	0	7.83e-05	0|0	S8B1N5		4.56	0		0	2	MASCOT		T
	R16065_9_7451_1,9513	R.DLKPENLLLDR.H	1325.74	-6e-05	2	1	55.9	0	1.31e-05	0|0	S8B1N5		4.56	0		0	2	MASCOT		T
	R16065_9_7451_1,9689	R.DLKPENLLLDR.H	1325.74	0.0022	2	1	20.31	0	0.047	0|0	S8B1N5		4.56	0		0	2	MASCOT		T
	R16065_9_7451_1,5507	R.FPNPVAK.F	772.435	0.00247	2	1	20.07	0	0.149	0|0	S8B1N5		8.75	0		0	2	MASCOT		T
	R16065_9_7451_1,5869	R.FPNPVAK.F	772.435	0.00015	2	1	27.5	0	0.0166	0|0	S8B1N5		8.75	0		0	2	MASCOT		T
	R16065_9_7451_1,6036	R.FPNPVAK.F	772.435	0.00047	2	1	24.99	0	0.0296	0|0	S8B1N5		8.75	0		0	2	MASCOT		T
	R16065_9_7451_1,5726	R.FYAMK.V	659.322	0.0006	2	1	21.18	0	0.0175	0|0	S8B1N5		8.59	0		0	2	MASCOT		T
	R16065_9_7451_1,3024	R.GGQGDASQYDK.Y	1125.48	0.00799	2	1	46.51	0	6.48e-05	0|0	S8B1N5		4.21	0		0	2	MASCOT		T
	R16065_9_7451_1,3171	R.GGQGDASQYDK.Y	1125.48	0.00799	2	1	38.86	0	0.000377	0|0	S8B1N5		4.21	0		0	2	MASCOT		T
	R16065_9_7451_1,8131	R.KDIDAPYIPPIR.G	1397.78	0.00109	2	1	71.74	0	3.68e-07	0|0	S8B1N5		5.96	1		0	2	MASCOT		T
	R16065_9_7451_1,8133	R.KDIDAPYIPPIR.G	1397.78	-0.00222	3	1	37.6	0	0.000956	0|0	S8B1N5		5.96	1		0	2	MASCOT		T
	R16065_9_7451_1,8295	R.KDIDAPYIPPIR.G	1397.78	-0.00033	3	1	31.08	0	0.00421	0|0	S8B1N5		5.96	1		0	2	MASCOT		T
	R16065_9_7451_1,8400	R.KDIDAPYIPPIR.G	1397.78	0.00045	2	1	57.31	0	1.02e-05	0|0	S8B1N5		5.96	1		0	2	MASCOT		T
	R16065_9_7451_1,8456	R.KDIDAPYIPPIR.G	1397.78	-0.00675	3	1	20.02	0	0.0528	0|0	S8B1N5		5.96	1		0	2	MASCOT		T
	R16065_9_7451_1,8559	R.KDIDAPYIPPIR.G	1397.78	0.00597	2	1	53.66	0	5.36e-05	0|0	S8B1N5		5.96	1		0	2	MASCOT		T
	R16065_9_7451_1,8618	R.KDIDAPYIPPIR.G	1397.78	-0.00675	3	1	22.34	0	0.0309	0|0	S8B1N5		5.96	1		0	2	MASCOT		T
	R16065_9_7451_1,8888	R.KDIDAPYIPPIR.G	1397.78	-0.00675	3	1	23.82	0	0.022	0|0	S8B1N5		5.96	1		0	2	MASCOT		T
	R16065_9_7451_1,9010	R.KDIDAPYIPPIR.G	1397.78	-0.00109	2	1	32.13	0	0.00334	0|0	S8B1N5		5.96	1		0	2	MASCOT		T
	R16065_9_7451_1,9034	R.KDIDAPYIPPIR.G	1397.78	-0.00138	3	1	23.98	0	0.0218	0|0	S8B1N5		5.96	1		0	2	MASCOT		T
	R16065_9_7451_1,10927	R.KDIDAPYIPPIR.G	1397.78	0.00131	2	1	35.22	0	0.00179	0|0	S8B1N5		5.96	1		0	2	MASCOT		T
	R16065_9_7451_1,4812	R.LGNLHGGPADVK.N	1177.63	0.00019	2	1	42.25	0	0.000506	0|0	S8B1N5		6.74	0		0	2	MASCOT		T
	R16065_9_7451_1,4813	R.LGNLHGGPADVK.N	1177.63	0.00336	3	1	25.62	0	0.024	0|0	S8B1N5		6.74	0		0	2	MASCOT		T
	R16065_9_7451_1,4994	R.LGNLHGGPADVK.N	1177.63	0.00103	2	1	40.32	0	0.000785	0|0	S8B1N5		6.74	0		0	2	MASCOT		T
	R16065_9_7451_1,4995	R.LGNLHGGPADVK.N	1177.63	0.00057	3	1	25.2	0	0.0257	0|0	S8B1N5		6.74	0		0	2	MASCOT		T
	R16065_9_7451_1,5969	R.TLGTGSFGR.V	895.463	-0.0095	2	1	43.12	0	0.000982	0|0	S8B1N5		9.41	0		0	2	MASCOT		T
	R16065_9_7451_1,6141	R.TLGTGSFGR.V	895.463	0.00012	2	1	56.09	0	1.43e-05	0|0	S8B1N5		9.41	0		0	2	MASCOT		T
	R16065_9_7451_1,3347	R.VHLVQSK.H	810.483	0.00011	2	1	33.3	0	0.000959	0|0	S8B1N5		8.73	0		0	2	MASCOT		T
	R16065_9_7451_1,3469	R.VHLVQSK.H	810.483	-0.00055	2	1	21.92	0	0.0132	0|0	S8B1N5		8.73	0		0	2	MASCOT		T
8	tr|S8B3V4|S8B3V4_PENO1 Uncharacterized protein OS=Penicillium oxalicum (strain 114-2 / CGMCC 5302) GN=PDE_08445 PE=4 SV=1	14	14	0.3487	39143.3	6.29
	R16065_9_7451_1,5370	K.ALNDVVESGK.V	1031.54	-0.00055	2	1	70.12	0	1.06e-06	0|0	S8B3V4		4.37	0		0	2	MASCOT		T
	R16065_9_7451_1,8201	K.CFFGVDDQGK.F	1172.5	-0.00265	2	1	47.74	0	2.36e-05	0|0	S8B3V4		4.21	0		0	2	MASCOT		T
	R16065_9_7451_1,8202	K.FPPIMASAR.N	989.524	-0.00209	2	1	32.18	0	0.00602	0|0	S8B3V4		9.75	0		0	2	MASCOT		T
	R16065_9_7451_1,7115	K.HIFDAVDASVK.R	1201.62	-0.0004	2	1	48.4	0	0.000111	0|0	S8B3V4		5.21	0		0	2	MASCOT		T
	R16065_9_7451_1,9468	K.IVLGTMGFGSK.Q	1109.6	-0.00515	2	1	35.48	0	0.00161	0|0	S8B3V4		8.75	0		0	2	MASCOT		T
	R16065_9_7451_1,5513	K.KLEIPR.D	755.477	-0.00099	2	1	22.59	0	0.0135	0|0	S8B3V4		8.75	1		0	2	MASCOT		T
	R16065_9_7451_1,5745	K.SIAALER.-	759.436	0.00317	2	1	30.83	0	0.0182	0|0	S8B3V4		5.72	0		0	2	MASCOT		T
	R16065_9_7451_1,5850	K.VIEYAYK.Q	885.472	9e-05	2	1	38.74	0	0.000535	0|0	S8B3V4		5.97	0		0	2	MASCOT		T
	R16065_9_7451_1,2827	R.ENSDGALK.A	833.4	-0.00217	2	1	39.13	0	0.000764	0|0	S8B3V4		4.37	0		0	2	MASCOT		T
	R16065_9_7451_1,6038	R.IDEAVASLK.V	945.525	0.00163	2	1	56.63	0	2.51e-05	0|0	S8B3V4		4.37	0		0	2	MASCOT		T
	R16065_9_7451_1,9959	R.LGTYIDVLQIHR.L	1427.8	0.00014	2	1	50.33	0	5.61e-05	0|0	S8B3V4		6.74	0		0	2	MASCOT		T
	R16065_9_7451_1,4548	R.NDGEFVNR.V	950.433	-0.00029	2	1	45.3	0	0.000131	0|0	S8B3V4		4.37	0		0	2	MASCOT		T
	R16065_9_7451_1,3000	R.SEEVVGK.A	747.388	0.00022	2	1	23.5	0	0.0503	0|0	S8B3V4		4.53	0		0	2	MASCOT		T
	R16065_9_7451_1,4965	R.VVIMTK.C	690.422	0.00015	2	1	24.66	0	0.0154	0|0	S8B3V4		8.72	0		0	2	MASCOT		T
9	tr|S8AUC5|S8AUC5_PENO1 cAMP-dependent protein kinase regulatory subunit OS=Penicillium oxalicum (strain 114-2 / CGMCC 5302) GN=PDE_04688 PE=3 SV=1	48	12	0.3244	44075.5	4.93
	R16065_9_7451_1,6787	K.IADALEPIK.F	969.561	-0.01123	2	1	21.57	0	0.0529	0|0	S8AUC5		4.37	0		0	2	MASCOT		T
	R16065_9_7451_1,7134	K.IADALEPIK.F	969.561	-0.00059	2	1	32.45	0	0.00228	0|0	S8AUC5		4.37	0		0	2	MASCOT		T
	R16065_9_7451_1,7316	K.IADALEPIK.F	969.561	-0.00149	2	1	33.2	0	0.00191	0|0	S8AUC5		4.37	0		0	2	MASCOT		T
	R16065_9_7451_1,7501	K.IADALEPIK.F	969.561	-0.00045	2	1	33.44	0	0.00181	0|0	S8AUC5		4.37	0		0	2	MASCOT		T
	R16065_9_7451_1,2736	K.NDVSVK.Q	661.352	0.00029	2	1	36.31	0	0.00229	0|0	S8AUC5		5.84	0		0	2	MASCOT		T
	R16065_9_7451_1,2877	K.NDVSVK.Q	661.352	0.00027	2	1	49.81	0	0.000102	0|0	S8AUC5		5.84	0		0	2	MASCOT		T
	R16065_9_7451_1,3420	K.SEEQLAR.L	832.416	-0.00023	2	1	37.53	0	0.00153	0|0	S8AUC5		4.53	0		0	2	MASCOT		T
	R16065_9_7451_1,3555	K.SEEQLAR.L	832.416	7e-05	2	1	34.74	0	0.0029	0|0	S8AUC5		4.53	0		0	2	MASCOT		T
	R16065_9_7451_1,9527	K.STLWALDR.I	961.51	-0.00206	2	1	48.14	0	0.00018	0|0	S8AUC5		5.55	0		0	2	MASCOT		T
	R16065_9_7451_1,9697	K.STLWALDR.I	961.51	2e-05	2	1	36.19	0	0.00269	0|0	S8AUC5		5.55	0		0	2	MASCOT		T
	R16065_9_7451_1,9850	K.STLWALDR.I	961.51	0.0005	2	1	38.76	0	0.00149	0|0	S8AUC5		5.55	0		0	2	MASCOT		T
	R16065_9_7451_1,10004	K.STLWALDR.I	961.51	-0.00118	2	1	20.55	0	0.0987	0|0	S8AUC5		5.55	0		0	2	MASCOT		T
	R16065_9_7451_1,10252	K.STLWALDR.I	961.51	-0.0012	2	1	26.84	0	0.0232	0|0	S8AUC5		5.55	0		0	2	MASCOT		T
	R16065_9_7451_1,9035	K.TVLDALVEKPIPAK.G	1493.89	0.00101	2	1	43.33	0	0.000111	0|0	S8AUC5		5.73	0		0	2	MASCOT		T
	R16065_9_7451_1,9036	K.TVLDALVEKPIPAK.G	1493.89	-0.01171	3	1	37.6	0	0.000243	0|0	S8AUC5		5.73	0		0	2	MASCOT		T
	R16065_9_7451_1,9197	K.TVLDALVEKPIPAK.G	1493.89	0.00039	2	1	79.31	0	2.17e-08	0|0	S8AUC5		5.73	0		0	2	MASCOT		T
	R16065_9_7451_1,9199	K.TVLDALVEKPIPAK.G	1493.89	-0.00082	3	1	46.52	0	4.12e-05	0|0	S8AUC5		5.73	0		0	2	MASCOT		T
	R16065_9_7451_1,9349	K.TVLDALVEKPIPAK.G	1493.89	-0.00031	2	1	79.26	0	2.19e-08	0|0	S8AUC5		5.73	0		0	2	MASCOT		T
	R16065_9_7451_1,9763	K.TVLDALVEKPIPAK.G	1493.89	0.00459	2	1	20.91	0	0.015	0|0	S8AUC5		5.73	0		0	2	MASCOT		T
	R16065_9_7451_1,2850	R.AANVVTK.T	702.414	-0.00031	2	1	43.2	0	0.00055	0|0	S8AUC5		8.8	0		0	2	MASCOT		T
	R16065_9_7451_1,3003	R.AANVVTK.T	702.414	0.00173	2	1	31.1	0	0.0134	0|0	S8AUC5		8.8	0		0	2	MASCOT		T
	R16065_9_7451_1,2787	R.AATVVSTDAK.S	962.515	-0.00026	2	1	36.32	0	0.00212	0|0	S8AUC5		5.88	0		0	2	MASCOT		T
	R16065_9_7451_1,3559	R.AATVVSTDAK.S	962.515	-0.00046	2	1	60.25	0	8.59e-06	0|0	S8AUC5		5.88	0		0	2	MASCOT		T
	R16065_9_7451_1,3707	R.AATVVSTDAK.S	962.515	-0.00016	2	1	47.83	0	0.00015	0|0	S8AUC5		5.88	0		0	2	MASCOT		T
	R16065_9_7451_1,3859	R.AATVVSTDAK.S	962.515	0.00272	2	1	38.93	0	0.00117	0|0	S8AUC5		5.88	0		0	2	MASCOT		T
	R16065_9_7451_1,4005	R.AATVVSTDAK.S	962.515	0.00258	2	1	55.89	0	4.32e-05	0|0	S8AUC5		5.88	0		0	2	MASCOT		T
	R16065_9_7451_1,4162	R.AATVVSTDAK.S	962.515	-0.0012	2	1	30.45	0	0.00829	0|0	S8AUC5		5.88	0		0	2	MASCOT		T
	R16065_9_7451_1,10288	R.GDYFGELALLDDKPR.A	1708.85	-0.00036	2	1	50.15	0	8.36e-05	0|0	S8AUC5		4.23	0		0	2	MASCOT		T
	R16065_9_7451_1,5874	R.GPFDTAPGDGTDR.L	1305.57	0.00069	2	1	56.39	0	4.82e-06	0|0	S8AUC5		3.93	0		0	2	MASCOT		T
	R16065_9_7451_1,6043	R.GPFDTAPGDGTDR.L	1305.57	0.00053	2	1	51.28	0	1.56e-05	0|0	S8AUC5		3.93	0		0	2	MASCOT		T
	R16065_9_7451_1,6229	R.GPFDTAPGDGTDR.L	1305.57	0.00063	2	1	51.2	0	1.59e-05	0|0	S8AUC5		3.93	0		0	2	MASCOT		T
	R16065_9_7451_1,6370	R.GPFDTAPGDGTDR.L	1305.57	0.00099	2	1	49.64	0	2.28e-05	0|0	S8AUC5		3.93	0		0	2	MASCOT		T
	R16065_9_7451_1,6816	R.GPFDTAPGDGTDR.L	1305.57	-0.00211	2	1	30.84	0	0.00486	0|0	S8AUC5		3.93	0		0	2	MASCOT		T
	R16065_9_7451_1,6433	R.ILM*DSAFQR.R	1096.55	-0.00044	2	1	49.12	0	6.67e-05	0|0	S8AUC5		5.84	0	15.994919 Oxidation (M)	0	2	MASCOT		T
	R16065_9_7451_1,6583	R.ILM*DSAFQR.R	1096.55	4e-05	2	1	34.38	0	0.00202	0|0	S8AUC5		5.84	0	15.994919 Oxidation (M)	0	2	MASCOT		T
	R16065_9_7451_1,8055	R.ILM*DSAFQR.R	1096.55	-0.00718	2	1	25.93	0	0.036	0|0	S8AUC5		5.84	0	15.994919 Oxidation (M)	0	2	MASCOT		T
	R16065_9_7451_1,8300	R.ILMDSAFQR.R	1080.55	-0.0021	2	1	32.5	0	0.00818	0|0	S8AUC5		5.84	0		0	2	MASCOT		T
	R16065_9_7451_1,8465	R.ILMDSAFQR.R	1080.55	0.00012	2	1	51.77	0	4.79e-05	0|0	S8AUC5		5.84	0		0	2	MASCOT		T
	R16065_9_7451_1,8617	R.ILMDSAFQR.R	1080.55	0.00132	2	1	30.64	0	0.00643	0|0	S8AUC5		5.84	0		0	2	MASCOT		T
	R16065_9_7451_1,10703	R.ILMDSAFQR.R	1080.55	-0.0009	2	1	60.4	0	6.66e-06	0|0	S8AUC5		5.84	0		0	2	MASCOT		T
	R16065_9_7451_1,10924	R.ILMDSAFQR.R	1080.55	-0.00036	2	1	48.52	0	0.000102	0|0	S8AUC5		5.84	0		0	2	MASCOT		T
	R16065_9_7451_1,11173	R.ILMDSAFQR.R	1080.55	-0.00052	2	1	47.03	0	0.000141	0|0	S8AUC5		5.84	0		0	2	MASCOT		T
	R16065_9_7451_1,7937	R.LLGPVEDIM*R.R	1158.62	0.00599	2	1	34.77	0	0.00562	0|0	S8AUC5		4.37	0	15.994919 Oxidation (M)	0	2	MASCOT		T
	R16065_9_7451_1,8109	R.LLGPVEDIM*R.R	1158.62	0.00151	2	1	38.63	0	0.00131	0|0	S8AUC5		4.37	0	15.994919 Oxidation (M)	0	2	MASCOT		T
	R16065_9_7451_1,8282	R.LLGPVEDIM*R.R	1158.62	0.00599	2	1	21.87	0	0.11	0|0	S8AUC5		4.37	0	15.994919 Oxidation (M)	0	2	MASCOT		T
	R16065_9_7451_1,10205	R.LLGPVEDIMR.R	1142.62	-0.00045	2	1	45.28	0	0.000212	0|0	S8AUC5		4.37	0		0	2	MASCOT		T
	R16065_9_7451_1,10410	R.LLGPVEDIMR.R	1142.62	-0.00025	2	1	36.78	0	0.0015	0|0	S8AUC5		4.37	0		0	2	MASCOT		T
	R16065_9_7451_1,7421	R.TSVSAESLNPTSAGSDSWSPPQHPK.S	2567.2	-0.00221	3	1	80.27	0	4.51e-08	0|0	S8AUC5		5.29	0		0	2	MASCOT		T
10	tr|S8BI41|S8BI41_PENO1 Uncharacterized protein OS=Penicillium oxalicum (strain 114-2 / CGMCC 5302) GN=PDE_09866 PE=4 SV=1	20	12	0.3538	37871.7	6.68
	R16065_9_7451_1,3765	K.GGVLTGK.Y	631.377	6e-05	2	1	45.82	0	0.000439	0|0	S8BI41		8.75	0		0	2	MASCOT		T
	R16065_9_7451_1,5759	K.IEAAVGTKPAMEVTR.F	1572.84	0.00866	2	1	47.03	0	0.000254	0|0	S8BI41		6.14	0		0	2	MASCOT		T
	R16065_9_7451_1,5836	K.LTEEVLEK.I	960.525	0.00047	2	1	50.11	0	0.000113	0|0	S8BI41		4.25	0		0	2	MASCOT		T
	R16065_9_7451_1,5303	K.NPHVSSM*IIGASR.V	1384.7	0.00742	2	1	21.5	0	0.102	0|0	S8BI41		9.76	0	15.994919 Oxidation (M)	0	2	MASCOT		T
	R16065_9_7451_1,6668	K.NPHVSSMIIGASR.V	1368.71	-0.00222	2	1	27.86	0	0.0113	0|0	S8BI41		9.76	0		0	2	MASCOT		T
	R16065_9_7451_1,6687	K.NPHVSSMIIGASR.V	1368.71	-0.01022	3	1	29.98	0	0.00673	0|0	S8BI41		9.76	0		0	2	MASCOT		T
	R16065_9_7451_1,5993	K.QNDLVISTK.L	1017.56	-0.00131	2	1	45.69	0	0.000231	0|0	S8BI41		5.84	0		0	2	MASCOT		T
	R16065_9_7451_1,3198	K.YNDSTNPPPGSR.L	1304.59	-0.0006	2	1	70.34	0	2.64e-07	0|0	S8BI41		5.84	0		0	2	MASCOT		T
	R16065_9_7451_1,3476	K.YNDSTNPPPGSR.L	1304.59	-0.00032	2	1	42.49	0	0.000163	0|0	S8BI41		5.84	0		0	2	MASCOT		T
	R16065_9_7451_1,4968	R.ALAVVEK.L	729.451	0.00047	2	1	35.53	0	0.00386	0|0	S8BI41		6.05	0		0	2	MASCOT		T
	R16065_9_7451_1,4899	R.ETPM*EEVVR.G	1105.52	-0.00325	2	1	39.24	0	0.000643	0|0	S8BI41		4.25	0	15.994919 Oxidation (M)	0	2	MASCOT		T
	R16065_9_7451_1,7382	R.ETPMEEVVR.G	1089.52	-0.00241	2	1	40.51	0	0.000511	0|0	S8BI41		4.25	0		0	2	MASCOT		T
	R16065_9_7451_1,6096	R.GFNHLINTGK.A	1100.58	-5e-05	2	1	41.13	0	0.000686	0|0	S8BI41		8.76	0		0	2	MASCOT		T
	R16065_9_7451_1,6109	R.GFNHLINTGK.A	1100.58	0.00042	3	1	34.4	0	0.00323	0|0	S8BI41		8.76	0		0	2	MASCOT		T
	R16065_9_7451_1,4507	R.KTVGDEGWK.K	1019.52	0.00291	2	1	28.78	0	0.0288	0|0	S8BI41		6.07	1		0	2	MASCOT		T
	R16065_9_7451_1,7437	R.LAESSDGYIQGLR.K	1408.71	-0.00184	2	1	41.21	0	0.000666	0|0	S8BI41		4.37	0		0	2	MASCOT		T
	R16065_9_7451_1,7612	R.LAESSDGYIQGLR.K	1408.71	0.00086	2	1	92.89	0	4.34e-09	0|0	S8BI41		4.37	0		0	2	MASCOT		T
	R16065_9_7451_1,7788	R.LAESSDGYIQGLR.K	1408.71	-0.00606	2	1	78.42	0	2.29e-07	0|0	S8BI41		4.37	0		0	2	MASCOT		T
	R16065_9_7451_1,5266	R.VEQVYENVR.A	1135.57	0.00148	2	1	37.94	0	0.00404	0|0	S8BI41		4.53	0		0	2	MASCOT		T
	R16065_9_7451_1,5591	R.VEQVYENVR.A	1135.57	-0.00436	2	1	20.54	0	0.0799	0|0	S8BI41		4.53	0		0	2	MASCOT		T
11	tr|S8B029|S8B029_PENO1 Elongation factor 1-alpha OS=Penicillium oxalicum (strain 114-2 / CGMCC 5302) GN=PDE_02596 PE=3 SV=1	17	12	0.2239	49796.7	9.1
	R16065_9_7451_1,2887	K.CGGIDSR.T	764.336	0.00284	2	1	30.76	0	0.00306	0|0	S8B029		5.83	0		0	2	MASCOT		T
	R16065_9_7451_1,5295	K.ETSNFIK.K	838.43	0.00019	2	1	58.05	0	6.74e-06	0|0	S8B029/A0A0G3F732		6.1	0		0	2	MASCOT		T
	R16065_9_7451_1,6996	K.FSELLEK.I	865.467	-0.00619	2	1	35.42	0	0.00534	0|0	S8B029/A0A0G3F732		4.53	0		0	2	MASCOT		T
	R16065_9_7451_1,7159	K.FSELLEK.I	865.467	-0.00039	2	1	28.17	0	0.0104	0|0	S8B029/A0A0G3F732		4.53	0		0	2	MASCOT		T
	R16065_9_7451_1,6777	K.ISGIGTVPVGR.V	1055.62	-0.00086	2	1	27.29	0	0.00765	0|0	S8B029/A0A0G3F732		9.75	0		0	2	MASCOT		T
	R16065_9_7451_1,6965	K.ISGIGTVPVGR.V	1055.62	-0.0023	2	1	41.07	0	0.000379	0|0	S8B029/A0A0G3F732		9.75	0		0	2	MASCOT		T
	R16065_9_7451_1,3695	K.SGDAAIVK.M	760.42	0.00025	2	1	38.6	0	0.00207	0|0	S8B029/A0A0G3F732		5.55	0		0	2	MASCOT		T
	R16065_9_7451_1,4867	K.STTTGHLIYK.C	1120.6	0.00075	2	1	39.15	0	0.000894	0|0	S8B029		8.33	0		0	2	MASCOT		T
	R16065_9_7451_1,2610	K.SVEM*HHTQLK.E	1225.6	0.00665	2	1	24.28	0	0.0696	0|0	S8B029/A0A0G3F732		6.66	0	15.994919 Oxidation (M)	0	2	MASCOT		T
	R16065_9_7451_1,3349	K.SVEMHHTQLK.E	1209.6	-0.00028	2	1	50.92	0	4.29e-05	0|0	S8B029/A0A0G3F732		6.66	0		0	2	MASCOT		T
	R16065_9_7451_1,6592	K.YEVTVIDAPGHR.D	1356.69	-0.00234	3	1	58.03	0	1.13e-05	0|0	S8B029		5.32	0		0	2	MASCOT		T
	R16065_9_7451_1,6730	K.YEVTVIDAPGHR.D	1356.69	-0.00208	2	1	24.41	0	0.052	0|0	S8B029		5.32	0		0	2	MASCOT		T
	R16065_9_7451_1,7603	R.LPLQDVYK.I	975.551	-0.00308	2	1	25.01	0	0.0243	0|0	S8B029/A0A0G3F732		5.84	0		0	2	MASCOT		T
	R16065_9_7451_1,7782	R.LPLQDVYK.I	975.551	-0.00038	2	1	30.89	0	0.00648	0|0	S8B029/A0A0G3F732		5.84	0		0	2	MASCOT		T
	R16065_9_7451_1,7677	R.QLIVALNK.M	898.572	-0.00088	2	1	20.34	0	0.0264	0|0	S8B029/A0A0G3F732		8.75	0		0	2	MASCOT		T
	R16065_9_7451_1,6268	R.QTVAVGVIK.S	914.567	-0.00087	2	1	39.59	0	0.00083	0|0	S8B029		8.75	0		0	2	MASCOT		T
	R16065_9_7451_1,4594	R.YNEIVK.E	765.414	0.00138	2	1	37.27	0	0.00528	0|0	S8B029/A0A0G3F732		6	0		0	2	MASCOT		T
12	tr|S7ZA48|S7ZA48_PENO1 Uncharacterized protein OS=Penicillium oxalicum (strain 114-2 / CGMCC 5302) GN=PDE_02408 PE=4 SV=1	12	12	0.1819	77221.1	6.55
	R16065_9_7451_1,4800	K.AIVDHIR.K	823.478	0.00573	2	1	35.1	0	0.00366	0|0	S7ZA48		6.79	0		0	2	MASCOT		T
	R16065_9_7451_1,7569	K.DLLEANMR.L	961.477	0.00182	2	1	20.11	0	0.079	0|0	S7ZA48		4.37	0		0	2	MASCOT		T
	R16065_9_7451_1,6004	K.EGALMPPGPK.T	996.518	-0.00024	2	1	37.68	0	0.000955	0|0	S7ZA48		6.1	0		0	2	MASCOT		T
	R16065_9_7451_1,2959	K.FIDHQR.K	815.416	0.00014	2	1	21.55	0	0.0311	0|0	S7ZA48		6.74	0		0	2	MASCOT		T
	R16065_9_7451_1,9012	K.GQDPTAALEDFR.K	1319.62	0.00989	2	1	61.17	0	9.82e-06	0|0	S7ZA48		4.03	0		0	2	MASCOT		T
	R16065_9_7451_1,4504	K.NSGPNGVTSSGASIGSGK.E	1576.76	0.00344	2	1	99.39	0	1.35e-09	0|0	S7ZA48		8.75	0		0	2	MASCOT		T
	R16065_9_7451_1,7597	K.SYVPLGEYEEK.N	1313.63	0.00816	2	1	39.99	0	0.000356	0|0	S7ZA48		4.25	0		0	2	MASCOT		T
	R16065_9_7451_1,3916	R.ALGSDLHSDAHR.G	1278.62	0.00064	4	1	32.92	0	0.00322	0|0	S7ZA48		5.98	0		0	2	MASCOT		T
	R16065_9_7451_1,6173	R.AVIVEVER.T	914.531	-0.00218	2	1	26.16	0	0.027	0|0	S7ZA48		4.53	0		0	2	MASCOT		T
	R16065_9_7451_1,2705	R.HGESVDDQAGR.L	1170.51	-0.00189	2	1	53.71	0	8.94e-06	0|0	S7ZA48		4.54	0		0	2	MASCOT		T
	R16065_9_7451_1,4378	R.LGGDSDLSENGQR.Y	1347.61	0.0028	2	1	82.74	0	1.62e-08	0|0	S7ZA48		4.03	0		0	2	MASCOT		T
	R16065_9_7451_1,4919	R.TTDHVLLVSHR.S	1277.7	0.00335	2	1	33.72	0	0.00807	0|0	S7ZA48		6.61	0		0	2	MASCOT		T
13	tr|S7ZS36|S7ZS36_PENO1 ATP synthase subunit alpha OS=Penicillium oxalicum (strain 114-2 / CGMCC 5302) GN=PDE_06476 PE=3 SV=1	12	12	0.2154	60089.3	9.14
	R16065_9_7451_1,6194	K.APGILPR.H ! K.APGILPR.Q	723.451	-0.00063	2	1	31.5	0	0.00135	0|0	S8AK58 ! S7ZS36		9.8	0		0	2	MASCOT		T
	R16065_9_7451_1,8439	K.AQPTEVSSILEQR.I	1457.76	0.0067	2	1	53.05	0	0.000104	0|0	S7ZS36		4.53	0		0	2	MASCOT		T
	R16065_9_7451_1,8709	K.LFLAQYR.E	910.514	0.00177	2	1	27.72	0	0.0165	0|0	S8AK58/S7ZS36		8.75	0		0	2	MASCOT		T
	R16065_9_7451_1,8878	K.TAVALDTMLNQK.R	1304.69	0.00075	2	1	67.48	0	1.5e-06	0|0	S7ZS36		5.5	0		0	2	MASCOT		T
	R16065_9_7451_1,6719	R.ELIIGDR.Q	815.462	-0.00134	2	1	27.7	0	0.0186	0|0	S7ZS36		4.37	0		0	2	MASCOT		T
	R16065_9_7451_1,5550	R.GVQEEAGLAETGR.V	1316.64	0.00037	2	1	66.56	0	1.48e-06	0|0	S7ZS36		4.25	0		0	2	MASCOT		T
	R16065_9_7451_1,7320	R.HAVIIYDDLSK.Q	1273.68	-0.00426	2	1	49.78	0	0.000107	0|0	S7ZS36		5.21	0		0	2	MASCOT		T
	R16065_9_7451_1,4529	R.QSVNQPVQTGMK.C	1316.66	-0.01001	2	1	54.33	0	5.89e-05	0|0	S7ZS36		8.75	0		0	2	MASCOT		T
	R16065_9_7451_1,6146	R.STVAQLVK.T	845.509	0.00015	2	1	25.65	0	0.0221	0|0	S8AK58/S7ZS36		8.47	0		0	2	MASCOT		T
	R16065_9_7451_1,2726	R.VGSAAQVK.A	759.436	-0.0001	2	1	26.57	0	0.0295	0|0	S7ZS36		8.72	0		0	2	MASCOT		T
	R16065_9_7451_1,6683	R.VLSVGDGIAR.V	986.563	-0.0098	2	1	47.24	0	0.000214	0|0	S7ZS36		5.81	0		0	2	MASCOT		T
	R16065_9_7451_1,7012	R.VVDGLGNPIDGK.G	1183.63	0.0017	2	1	31.61	0	0.00418	0|0	S7ZS36		4.21	0		0	2	MASCOT		T
14	tr|S7ZWP5|S7ZWP5_PENO1 Uncharacterized protein OS=Penicillium oxalicum (strain 114-2 / CGMCC 5302) GN=PDE_09813 PE=3 SV=1	14	11	0.2588	42644.9	6.21
	R16065_9_7451_1,5433	K.GPIIPR.L	652.414	0.00012	2	1	37.12	0	0.000311	0|0	S7ZWP5		9.75	0		0	2	MASCOT		T
	R16065_9_7451_1,9657	K.LVDFGFAK.T	896.488	-9e-05	2	1	30.79	0	0.00383	0|0	S7ZWP5		5.84	0		0	2	MASCOT		T
	R16065_9_7451_1,2378	K.QVEHVR.N	767.416	0.00018	2	1	29.6	0	0.00515	0|0	S7ZWP5		6.75	0		0	2	MASCOT		T
	R16065_9_7451_1,6164	K.TLGTGTFAR.V	923.495	0.00094	2	1	31.27	0	0.00437	0|0	S7ZWP5		9.41	0		0	2	MASCOT		T
	R16065_9_7451_1,9043	K.TLSADDFHLIK.T	1259.66	0.00046	2	1	59.54	0	1.14e-05	0|0	S7ZWP5		5.18	0		0	2	MASCOT		T
	R16065_9_7451_1,9052	K.TLSADDFHLIK.T	1259.66	0	3	1	46.62	0	0.000223	0|0	S7ZWP5		5.18	0		0	2	MASCOT		T
	R16065_9_7451_1,4508	R.AHDLLEK.E	825.446	1e-05	2	1	28.62	0	0.00584	0|0	S7ZWP5		5.32	0		0	2	MASCOT		T
	R16065_9_7451_1,2719	R.FKDETDTNK.V	1097.51	-0.00055	2	1	44.57	0	0.000131	0|0	S7ZWP5		4.56	1		0	2	MASCOT		T
	R16065_9_7451_1,2737	R.FKDETDTNK.V	1097.51	0.00017	3	1	22.69	0	0.0191	0|0	S7ZWP5		4.56	1		0	2	MASCOT		T
	R16065_9_7451_1,6127	R.LAHAADASNFEEYPDSDNR.N	2121.91	-0.00144	3	1	58.37	0	1.53e-06	0|0	S7ZWP5		4.1	0		0	2	MASCOT		T
	R16065_9_7451_1,6130	R.LAHAADASNFEEYPDSDNR.N	2121.91	-0.00194	2	1	73.77	0	1.09e-07	0|0	S7ZWP5		4.1	0		0	2	MASCOT		T
	R16065_9_7451_1,6513	R.NQNLYTDDLK.K	1223.59	-0.00249	2	1	30.16	0	0.0179	0|0	S7ZWP5		4.21	0		0	2	MASCOT		T
	R16065_9_7451_1,5456	R.NQNLYTDDLKK.K	1351.69	0.0005	3	1	38.68	0	0.00119	0|0	S7ZWP5		5.96	1		0	2	MASCOT		T
	R16065_9_7451_1,7413	R.SANPFVVSER.Q	1105.56	-0.001	2	1	33.28	0	0.00399	0|0	S7ZWP5		5.72	0		0	2	MASCOT		T
15	tr|S8B573|S8B573_PENO1 Uncharacterized protein OS=Penicillium oxalicum (strain 114-2 / CGMCC 5302) GN=PDE_08970 PE=4 SV=1	10	10	0.0798	141192	6.36
	R16065_9_7451_1,6362	K.ALIGGGGANIR.K	998.574	0.00142	2	1	24.85	0	0.0182	0|0	S8B573		9.8	0		0	2	MASCOT		T
	R16065_9_7451_1,4953	K.DQHAETVEVPR.S	1280.62	0.00159	2	1	48.67	0	8.9e-05	0|0	S8B573		4.65	0		0	2	MASCOT		T
	R16065_9_7451_1,2905	K.EVAQQVGSK.Q	945.5	0.00032	2	1	28.88	0	0.0136	0|0	S8B573		6.1	0		0	2	MASCOT		T
	R16065_9_7451_1,5913	K.NQAQGEAIEIR.G	1228.63	-0.00472	2	1	74.8	0	5.13e-07	0|0	S8B573		4.53	0		0	2	MASCOT		T
	R16065_9_7451_1,2841	R.AEIER.I ! K.AEIER.V ! R.AEIER.L ! K.AEIER.T ! K.AELER.V ! R.AELER.A	617.325	-0.00032	2	1	20.86	0	0.1	0|0	S8AIL7 ! S7ZEF1 ! S8B573 ! S8AWJ2 ! S8AVA9 ! S7Z781		4.53	0		0	2	MASCOT		T
	R16065_9_7451_1,4101	R.GSASSLEEAR.D	1006.48	-0.00066	2	1	42.88	0	0.000358	0|0	S8B573		4.53	0		0	2	MASCOT		T
	R16065_9_7451_1,4827	R.LAAELQR.K	800.462	-2e-05	2	1	32.9	0	0.00477	0|0	S8B573		6	0		0	2	MASCOT		T
	R16065_9_7451_1,6072	R.QGSVVQDIQTR.T	1230.64	-0.00126	2	1	32.16	0	0.00556	0|0	S8B573		5.84	0		0	2	MASCOT		T
	R16065_9_7451_1,3642	R.SAQPQDVPR.V	997.506	0.00023	2	1	31.51	0	0.00392	0|0	S8B573		5.55	0		0	2	MASCOT		T
	R16065_9_7451_1,5940	R.VTVDHAGQSVPANPAIEETR.D	2091.05	-0.00893	3	1	59.04	0	1.06e-05	0|0	S8B573		4.65	0		0	2	MASCOT		T
16	tr|S7ZFK7|S7ZFK7_PENO1 Uncharacterized protein OS=Penicillium oxalicum (strain 114-2 / CGMCC 5302) GN=PDE_02379 PE=3 SV=1	9	9	0.1417	69515.5	5.06
	R16065_9_7451_1,8507	K.ATKPIIEVEFK.G	1274.74	0.00022	2	1	25.47	0	0.015	0|0	S7ZFK7		6.19	0		0	2	MASCOT		T
	R16065_9_7451_1,9044	K.FELTGIPPAPR.G	1197.66	-0.00026	2	1	23.37	0	0.0235	0|0	S8B581/S7ZFK7		6	0		0	2	MASCOT		T
	R16065_9_7451_1,4234	K.ITITNDK.G	804.446	-0.00018	2	1	23.86	0	0.0508	0|0	S7ZFK7		5.84	0		0	2	MASCOT		T
	R16065_9_7451_1,9105	K.LVSDFFNK.D	969.504	-0.00029	2	1	22.78	0	0.0279	0|0	S7ZFK7		5.84	0		0	2	MASCOT		T
	R16065_9_7451_1,5587	K.STAGDTHLGGEDFDNR.L	1691.73	0.00146	2	1	68.33	0	1.54e-07	0|0	S7ZFK7		4.22	0		0	2	MASCOT		T
	R16065_9_7451_1,2952	R.EEIER.L ! R.EEIER.K ! K.EEIER.E ! K.EEIER.R ! K.EEIER.M ! R.EELER.Q ! K.EELER.I ! R.EELER.A	675.331	0.00022	2	1	22.69	0	0.0466	0|0	S7ZKF9 ! S7ZXX5 ! S7ZQH7 ! S7ZUH3 ! S7ZFK7 ! S8B372 ! S8AX89 ! S7ZSQ1		4.25	0		0	2	MASCOT		T
	R16065_9_7451_1,6082	R.IEIIANDQGNR.T	1242.64	-0.00059	2	1	54.26	0	2.68e-05	0|0	S7ZFK7		4.37	0		0	2	MASCOT		T
	R16065_9_7451_1,4222	R.STMEPVER.V	948.445	-0.00041	2	1	32.26	0	0.00357	0|0	S7ZFK7		4.53	0		0	2	MASCOT		T
	R16065_9_7451_1,9505	R.TTPSFVAFTDTER.L	1471.71	-0.00635	2	1	63.88	0	7.53e-06	0|0	S7ZFK7		4.37	0		0	2	MASCOT		T
17	tr|S7ZFW1|S7ZFW1_PENO1 Uncharacterized protein OS=Penicillium oxalicum (strain 114-2 / CGMCC 5302) GN=PDE_02489 PE=4 SV=1	9	9	0.0821	132748	8.37
	R16065_9_7451_1,7045	K.AMGQALGLR.V	916.503	-0.00945	2	1	33.95	0	0.00715	0|0	S7ZFW1		9.8	0		0	2	MASCOT		T
	R16065_9_7451_1,2409	K.AVNSTDPK.G	831.421	0.0012	2	1	20.14	0	0.0809	0|0	S7ZFW1		5.88	0		0	2	MASCOT		T
	R16065_9_7451_1,6646	K.QALPTSSGEGDVLR.F	1429.73	-0.00458	2	1	31.15	0	0.0165	0|0	S7ZFW1		4.37	0		0	2	MASCOT		T
	R16065_9_7451_1,5029	K.TDIGQCSSATPAGESLSHK.D	1945.89	-0.00073	2	1	39.34	0	0.000995	0|0	S7ZFW1		5.29	0		0	2	MASCOT		T
	R16065_9_7451_1,4202	R.DGIVSER.M	775.394	-0.00035	2	1	27.35	0	0.0151	0|0	S7ZFW1		4.37	0		0	2	MASCOT		T
	R16065_9_7451_1,9494	R.EVLAVIIR.D	912.588	-0.00507	2	1	40.37	0	0.000216	0|0	S7ZFW1		6.1	0		0	2	MASCOT		T
	R16065_9_7451_1,5249	R.GTGPLSAPAATR.R	1098.59	-0.00253	2	1	36.78	0	0.00245	0|0	S7ZFW1		9.75	0		0	2	MASCOT		T
	R16065_9_7451_1,5167	R.IGVSSSVGTPDSR.S	1261.64	0.00556	2	1	37.21	0	0.00475	0|0	S7ZFW1		5.84	0		0	2	MASCOT		T
	R16065_9_7451_1,7301	R.LAIPNYTR.G	947.531	-0.0006	2	1	46.88	0	0.000172	0|0	S7ZFW1		8.75	0		0	2	MASCOT		T
18	tr|S7ZB51|S7ZB51_PENO1 Uncharacterized protein OS=Penicillium oxalicum (strain 114-2 / CGMCC 5302) GN=PDE_02754 PE=3 SV=1	9	8	0.3182	28978.8	9.18
	R16065_9_7451_1,4083	K.ALAAQQAAEQQR.L	1284.67	0.00149	2	1	67.54	0	1.19e-06	0|0	S7ZB51		6.05	0		0	2	MASCOT		T
	R16065_9_7451_1,5687	K.EFIDSATR.H	938.458	-0.00029	2	1	27.73	0	0.00978	0|0	S7ZB51		4.37	0		0	2	MASCOT		T
	R16065_9_7451_1,8712	K.TLPDSVTIIEPK.E	1312.74	0.00101	2	1	36.76	0	0.000981	0|0	S7ZB51		4.37	0		0	2	MASCOT		T
	R16065_9_7451_1,4239	R.ATHTQEVLGEQGR.R	1425.71	0.00066	2	1	59.21	0	9e-06	0|0	S7ZB51		5.4	0		0	2	MASCOT		T
	R16065_9_7451_1,4274	R.ATHTQEVLGEQGR.R	1425.71	-0.00737	3	1	33.65	0	0.00309	0|0	S7ZB51		5.4	0		0	2	MASCOT		T
	R16065_9_7451_1,7340	R.ELTSLIQK.R	931.546	-0.00383	2	1	33.95	0	0.00306	0|0	S7ZB51		6.1	0		0	2	MASCOT		T
	R16065_9_7451_1,5876	R.FIMESGAK.G	882.439	0.00622	2	1	20.8	0	0.107	0|0	S7ZB51		6	0		0	2	MASCOT		T
	R16065_9_7451_1,6632	R.GLSAVAQCESLR.Y	1290.65	-0.00072	2	1	54.73	0	3.01e-05	0|0	S7ZB51		6	0		0	2	MASCOT		T
	R16065_9_7451_1,9647	R.VTPTVTDIIIR.A	1227.73	0.00014	2	1	41.79	0	0.000272	0|0	S7ZB51		5.81	0		0	2	MASCOT		T
19	tr|S7ZBT6|S7ZBT6_PENO1 Actin OS=Penicillium oxalicum (strain 114-2 / CGMCC 5302) GN=PDE_01092 PE=3 SV=1	9	8	0.2373	41710.1	5.45
	R16065_9_7451_1,4754	K.AGFAGDDAPR.A	976.448	4e-05	2	1	63.72	0	1.66e-06	0|0	S7ZBT6		4.21	0		0	2	MASCOT		T
	R16065_9_7451_1,3987	K.DSYVGDEAQSK.R	1198.52	0.00261	2	1	39.74	0	0.000212	0|0	S7ZBT6		4.03	0		0	2	MASCOT		T
	R16065_9_7451_1,5713	K.EITALAPSSM*K.V	1163.6	0.0008	2	1	31.05	0	0.00667	0|0	S7ZBT6		6.1	0	15.994919 Oxidation (M)	0	2	MASCOT		T
	R16065_9_7451_1,7096	K.EITALAPSSMK.V	1147.6	0.00998	2	1	31.33	0	0.0202	0|0	S7ZBT6		6.1	0		0	2	MASCOT		T
	R16065_9_7451_1,4838	K.IIAPPER.K	795.472	-0.00044	2	1	24.63	0	0.0208	0|0	S7ZBT6		6	0		0	2	MASCOT		T
	R16065_9_7451_1,5375	K.QEYDESGPSIVHR.K	1516.7	0.00279	2	1	49.27	0	4.38e-05	0|0	S7ZBT6		4.65	0		0	2	MASCOT		T
	R16065_9_7451_1,10085	R.DLTDYLMK.I	998.486	-0.00049	2	1	29.01	0	0.0049	0|0	S7ZBT6		4.21	0		0	2	MASCOT		T
	R16065_9_7451_1,5607	R.HHGIMIGMGQK.D	1208.6	-0.00141	2	1	66.28	0	1.83e-06	0|0	S7ZBT6		8.76	0		0	2	MASCOT		T
	R16065_9_7451_1,8842	R.VAPEEHPILLTEAPINPK.S	1968.08	-0.00075	3	1	36.7	0	0.00109	0|0	S7ZBT6		4.75	0		0	2	MASCOT		T
20	tr|S8AYU4|S8AYU4_PENO1 Uncharacterized protein OS=Penicillium oxalicum (strain 114-2 / CGMCC 5302) GN=PDE_02095 PE=3 SV=1	12	7	0.3976	18874.6	5.31
	R16065_9_7451_1,4658	K.EGVDDEATPDSDTQVTK.S	1806.79	-0.00513	2	1	57.86	0	6.47e-06	0|0	S8AYU4		3.66	0		0	2	MASCOT		T
	R16065_9_7451_1,4823	K.EGVDDEATPDSDTQVTK.S	1806.79	-0.00079	2	1	95.74	0	5.33e-10	0|0	S8AYU4		3.66	0		0	2	MASCOT		T
	R16065_9_7451_1,2666	R.EYHSEEPK.E	1018.45	-8e-05	2	1	25.67	0	0.00366	0|0	S8AYU4		4.75	0		0	2	MASCOT		T
	R16065_9_7451_1,5994	R.LLDDYDVHR.A	1145.56	0.00012	2	1	51.45	0	4.44e-05	0|0	S8AYU4		4.41	0		0	2	MASCOT		T
	R16065_9_7451_1,6010	R.LLDDYDVHR.A	1145.56	0.00027	3	1	43.83	0	0.000257	0|0	S8AYU4		4.41	0		0	2	MASCOT		T
	R16065_9_7451_1,6177	R.LLDDYDVHR.A	1145.56	0.00584	2	1	38.89	0	0.00238	0|0	S8AYU4		4.41	0		0	2	MASCOT		T
	R16065_9_7451_1,6189	R.LLDDYDVHR.A	1145.56	0.01311	3	1	22.69	0	0.0221	0|0	S8AYU4		4.41	0		0	2	MASCOT		T
	R16065_9_7451_1,4863	R.QATSTQAFNPR.F	1220.6	-0.00063	2	1	49.55	0	9.43e-05	0|0	S8AYU4		9.75	0		0	2	MASCOT		T
	R16065_9_7451_1,5612	R.SIGEFQR.T	836.426	-0.00056	2	1	22.99	0	0.0349	0|0	S8AZV6/S8AYU4		5.72	0		0	2	MASCOT		T
	R16065_9_7451_1,7935	R.TFTFPGR.V	825.425	-0.00734	2	1	20.59	0	0.194	0|0	S8AYU4		9.41	0		0	2	MASCOT		T
	R16065_9_7451_1,8110	R.TFTFPGR.V	825.425	0.00018	2	1	25.38	0	0.0152	0|0	S8AYU4		9.41	0		0	2	MASCOT		T
	R16065_9_7451_1,2639	R.VDQENVK.A	831.421	0.00502	2	1	26.77	0	0.0167	0|0	S8AYU4		4.37	0		0	2	MASCOT		T
21	tr|S7Z8H7|S7Z8H7_PENO1 Uncharacterized protein OS=Penicillium oxalicum (strain 114-2 / CGMCC 5302) GN=PDE_01800 PE=4 SV=1	9	7	0.0583	111973	9.44
	R16065_9_7451_1,6926	R.DALLLHQAVR.E	1135.66	0.00548	2	1	38.65	0	0.00117	0|0	S7Z8H7		6.74	0		0	2	MASCOT		T
	R16065_9_7451_1,6945	R.DALLLHQAVR.E	1135.66	0.01275	3	1	20.3	0	0.154	0|0	S7Z8H7		6.74	0		0	2	MASCOT		T
	R16065_9_7451_1,2843	R.DYAAQTHR.Q	961.449	-0.00412	2	1	24.47	0	0.05	0|0	S7Z8H7		6.74	0		0	2	MASCOT		T
	R16065_9_7451_1,5160	R.EYEAVYR.T	929.436	0.00019	2	1	24.33	0	0.00886	0|0	S7Z8H7		4.53	0		0	2	MASCOT		T
	R16065_9_7451_1,3572	R.QDVQDLHR.A	1010.5	0.00866	2	1	50.8	0	0.000102	0|0	S7Z8H7		5.21	0		0	2	MASCOT		T
	R16065_9_7451_1,6361	R.TSTVDLEPPR.S	1114.57	0.00116	2	1	40.04	0	0.0014	0|0	S7Z8H7		4.37	0		0	2	MASCOT		T
	R16065_9_7451_1,4175	R.YDNSLER.C	896.411	-0.00089	2	1	22.43	0	0.0251	0|0	S7Z8H7		4.37	0		0	2	MASCOT		T
	R16065_9_7451_1,2338	R.YEHSDEDR.D	1050.41	-0.00045	2	1	42.2	0	3.62e-05	0|0	S7Z8H7		4.31	0		0	2	MASCOT		T
	R16065_9_7451_1,2345	R.YEHSDEDR.D	1050.41	-0.00317	3	1	23.01	0	0.00225	0|0	S7Z8H7		4.31	0		0	2	MASCOT		T
22	tr|S8AJ47|S8AJ47_PENO1 Uncharacterized protein OS=Penicillium oxalicum (strain 114-2 / CGMCC 5302) GN=PDE_00729 PE=4 SV=1	7	7	0.0941	80033.6	5.37
	R16065_9_7451_1,7214	K.AATLIEGAVDR.S	1115.61	-0.00723	2	1	30.76	0	0.0169	0|0	S8AJ47		4.37	0		0	2	MASCOT		T
	R16065_9_7451_1,8200	K.HLDAILETVR.A	1166.65	6e-05	2	1	30.76	0	0.00659	0|0	S8AJ47		5.32	0		0	2	MASCOT		T
	R16065_9_7451_1,7236	K.NVEESINTIASK.H	1304.67	-0.00206	2	1	56.2	0	1.96e-05	0|0	S8AJ47		4.53	0		0	2	MASCOT		T
	R16065_9_7451_1,5030	M.AADEVMEDAQSGSK.R	1437.62	0.00347	2	1	28.96	0	0.00349	0|0	S8AJ47		3.92	0		0	2	MASCOT		T
	R16065_9_7451_1,2908	R.ALDEQR.D	731.368	2e-05	2	1	30.72	0	0.00453	0|0	S8AJ47		4.37	0		0	2	MASCOT		T
	R16065_9_7451_1,2427	R.IREEEQR.K	959.49	0.00322	2	1	28.54	0	0.0108	0|0	S8AJ47		4.79	1		0	2	MASCOT		T
	R16065_9_7451_1,2102	R.REDVGEK.T	832.416	0.00098	2	1	32.33	0	0.00506	0|0	S8AJ47		4.68	1		0	2	MASCOT		T
23	tr|S7ZCI7|S7ZCI7_PENO1 Uncharacterized protein OS=Penicillium oxalicum (strain 114-2 / CGMCC 5302) GN=PDE_02929 PE=4 SV=1	6	6	0.1661	36028.6	5.92
	R16065_9_7451_1,4578	K.EQVEPIAR.K	941.505	-0.00016	2	1	28.93	0	0.00652	0|0	S7ZCI7		4.53	0		0	2	MASCOT		T
	R16065_9_7451_1,7521	K.LFEHSAITSIASK.H	1403.75	-0.00086	3	1	50.74	0	7.63e-05	0|0	S7ZCI7		6.75	0		0	2	MASCOT		T
	R16065_9_7451_1,8076	K.REDLFLVSK.L	1106.62	0.00126	2	1	56.74	0	1.09e-05	0|0	S7ZCI7		6.07	1		0	2	MASCOT		T
	R16065_9_7451_1,7240	K.SPAQVLIR.W ! R.SPAQVLLR.W	883.536	2e-05	2	1	61.12	0	2.51e-06	0|0	S7ZIR7 ! S7ZCI7		9.47	0		0	2	MASCOT		T
	R16065_9_7451_1,7720	K.VNNDTCADQVYNAIK.A	1724.79	-0.00191	2	1	63.99	0	2.73e-06	0|0	S7ZCI7		4.21	0		0	2	MASCOT		T
	R16065_9_7451_1,9227	R.EDLFLVSK.L	950.519	-7e-05	2	1	35.29	0	0.00163	0|0	S7ZCI7		4.37	0		0	2	MASCOT		T
24	tr|S7ZDZ5|S7ZDZ5_PENO1 Uncharacterized protein OS=Penicillium oxalicum (strain 114-2 / CGMCC 5302) GN=PDE_01836 PE=4 SV=1	6	6	0.1558	37396.8	9.11
	R16065_9_7451_1,2670	K.EGQHFDK.D	860.39	0.00042	2	1	21.81	0	0.0112	0|0	S7ZDZ5		5.32	0		0	2	MASCOT		T
	R16065_9_7451_1,10324	K.LGGLFELR.S	904.525	-0.0013	2	1	38.4	0	0.000773	0|0	S7ZDZ5		6	0		0	2	MASCOT		T
	R16065_9_7451_1,6338	R.DLTANSTEEFNR.R	1396.63	0.00117	2	1	28.17	0	0.00853	0|0	S7ZDZ5		4.14	0		0	2	MASCOT		T
	R16065_9_7451_1,3752	R.ENLEEAR.K	860.411	-0.00023	2	1	32.09	0	0.00278	0|0	S7ZDZ5		4.25	0		0	2	MASCOT		T
	R16065_9_7451_1,2663	R.MAGAEENR.V	877.383	0.01048	2	1	45.56	0	9.31e-05	0|0	S7ZDZ5		4.53	0		0	2	MASCOT		T
	R16065_9_7451_1,8706	R.VNLVGSWR.T	930.516	0.00017	2	1	20.78	0	0.0944	0|0	S7ZDZ5		9.72	0		0	2	MASCOT		T
25	tr|S7ZEW8|S7ZEW8_PENO1 Uncharacterized protein OS=Penicillium oxalicum (strain 114-2 / CGMCC 5302) GN=PDE_03760 PE=3 SV=1	6	6	0.1167	71742.3	5.81
	R16065_9_7451_1,9483	K.DAGQIAGLNVLR.V	1226.69	0.0001	2	1	28.06	0	0.00719	0|0	S7ZEW8		5.84	0		0	2	MASCOT		T
	R16065_9_7451_1,9084	K.NAVVTVPAYFNDSQR.Q	1680.83	0.00129	2	1	27.49	0	0.0211	0|0	S7ZEW8		5.84	0		0	2	MASCOT		T
	R16065_9_7451_1,4635	K.NQSGEGTATAEELK.A	1434.67	-0.00206	2	1	68.56	0	1.35e-06	0|0	S7ZEW8		4.25	0		0	2	MASCOT		T
	R16065_9_7451_1,2579	K.YGEADKER.K	967.448	-0.00481	2	1	30.44	0	0.0127	0|0	S7ZEW8		4.68	1		0	2	MASCOT		T
	R16065_9_7451_1,9079	R.QAVVNPENTLFATK.R	1531.81	-0.00125	2	1	24.15	0	0.08	0|0	S7ZEW8		6	0		0	2	MASCOT		T
	R16065_9_7451_1,7620	R.TTPSVVGFAQDGER.L	1463.71	-0.0002	2	1	48.15	0	0.000295	0|0	S7ZEW8		4.37	0		0	2	MASCOT		T
26	tr|S7ZVN4|S7ZVN4_PENO1 Uncharacterized protein OS=Penicillium oxalicum (strain 114-2 / CGMCC 5302) GN=PDE_09443 PE=4 SV=1	6	6	0.1398	40234	11.11
	R16065_9_7451_1,7938	K.AAIALLK.A	699.476	0.00358	2	1	37.85	0	0.000394	0|0	S7ZVN4		8.8	0		0	2	MASCOT		T
	R16065_9_7451_1,6254	K.AIGAGEDLVK.V	972.536	0.0033	2	1	27.81	0	0.0248	0|0	S7ZVN4		4.37	0		0	2	MASCOT		T
	R16065_9_7451_1,6032	K.TFEGAALTK.T	937.499	-0.01381	2	1	23.22	0	0.0862	0|0	S7ZVN4		5.66	0		0	2	MASCOT		T
	R16065_9_7451_1,8143	R.ASAGFANVLHEN.-	1229.59	-0.00182	2	1	32.46	0	0.0103	0|0	S7ZVN4		5.24	0		0	2	MASCOT		T
	R16065_9_7451_1,7986	R.GPLVVYNPEVDGK.E	1386.73	-0.00636	2	1	29.07	0	0.0168	0|0	S7ZVN4		4.37	0		0	2	MASCOT		T
	R16065_9_7451_1,7105	R.RGPLVVYNPEVDGK.E	1542.83	-0.00526	2	1	42.79	0	0.000615	0|0	S7ZVN4		6.07	1		0	2	MASCOT		T
27	tr|S7Z7G2|S7Z7G2_PENO1 Uncharacterized protein OS=Penicillium oxalicum (strain 114-2 / CGMCC 5302) GN=PDE_01442 PE=4 SV=1	5	5	0.089	65171.8	5.25
	R16065_9_7451_1,10121	K.ELYAFLPPASR.L	1263.67	0.00045	2	1	45.41	0	0.000653	0|0	S7Z7G2		6.1	0		0	2	MASCOT		T
	R16065_9_7451_1,3956	R.ASPAPASNASVQGADAR.A	1569.76	0.00882	2	1	68.59	0	2.42e-06	0|0	S7Z7G2		5.88	0		0	2	MASCOT		T
	R16065_9_7451_1,4057	R.DVNGEVVNR.M	1001.5	0.00833	2	1	49.62	0	0.000194	0|0	S7Z7G2		4.37	0		0	2	MASCOT		T
	R16065_9_7451_1,5566	R.EGSYYYEAR.V	1137.48	0.00183	2	1	41.86	0	6.84e-05	0|0	S7Z7G2		4.53	0		0	2	MASCOT		T
	R16065_9_7451_1,2093	R.TTATSTAR.A	808.416	0.0032	2	1	41.29	0	0.00101	0|0	S7Z7G2		9.41	0		0	2	MASCOT		T
28	tr|S7Z7J5|S7Z7J5_PENO1 Uncharacterized protein OS=Penicillium oxalicum (strain 114-2 / CGMCC 5302) GN=PDE_01080 PE=3 SV=1	5	5	0.098	44842.5	7.23
	R16065_9_7451_1,6100	K.EDVAEALK.S	874.452	-0.00111	2	1	24.85	0	0.0599	0|0	S7Z7J5		4.14	0		0	2	MASCOT		T
	R16065_9_7451_1,2738	K.EIGCR.R ! R.ELGCR.I	634.298	-9e-05	2	1	21.94	0	0.0272	0|0	S7Z7J5 ! S7ZUH0		6.09	0		0	2	MASCOT		T
	R16065_9_7451_1,4723	K.VVGTVAVGR.I	857.52	5e-05	2	1	40.05	0	0.00085	0|0	S7Z7J5		9.72	0		0	2	MASCOT		T
	R16065_9_7451_1,8263	R.MLGTTENELGIR.K	1333.68	0.0007	2	1	51.15	0	6.75e-05	0|0	S7Z7J5		4.53	0		0	2	MASCOT		T
	R16065_9_7451_1,2342	R.YAEGTK.N	668.325	-0.00012	2	1	22.08	0	0.0201	0|0	S7Z7J5		6	0		0	2	MASCOT		T
29	tr|S7Z9N8|S7Z9N8_PENO1 Uncharacterized protein OS=Penicillium oxalicum (strain 114-2 / CGMCC 5302) GN=PDE_00304 PE=3 SV=1	5	5	0.2527	20718.6	10.65
	R16065_9_7451_1,7950	K.ALTYLDNVTK.K	1137.62	-0.00068	2	1	30.72	0	0.00517	0|0	S7Z9N8		5.88	0		0	2	MASCOT		T
	R16065_9_7451_1,8358	K.GLDTSALIVK.R	1016.6	-0.00027	2	1	34.92	0	0.00209	0|0	S7Z9N8		5.84	0		0	2	MASCOT		T
	R16065_9_7451_1,2174	K.NAEANADTK.G	933.427	0.00012	2	1	60.46	0	2.74e-06	0|0	S7Z9N8		4.37	0		0	2	MASCOT		T
	R16065_9_7451_1,3855	R.IQVNQAPK.G	897.515	-0.00052	2	1	20.41	0	0.0391	0|0	S7Z9N8		8.75	0		0	2	MASCOT		T
	R16065_9_7451_1,5835	R.YAAQEIPVAK.S	1089.59	-0.00153	2	1	36.62	0	0.0023	0|0	S7Z9N8		6	0		0	2	MASCOT		T
30	tr|S7ZDX2|S7ZDX2_PENO1 Uncharacterized protein OS=Penicillium oxalicum (strain 114-2 / CGMCC 5302) GN=PDE_01806 PE=3 SV=1	5	5	0.1969	22144.5	10.18
	R16065_9_7451_1,6535	K.IVGEYGLR.N	906.504	0.00025	2	1	35.5	0	0.00233	0|0	S7ZDX2		6	0		0	2	MASCOT		T
	R16065_9_7451_1,7833	R.ELLTLDEK.D	960.525	0.00107	2	1	37.06	0	0.00231	0|0	S7ZDX2		4.14	0		0	2	MASCOT		T
	R16065_9_7451_1,4183	R.LDSELK.I	704.382	-0.00013	2	1	25.55	0	0.0362	0|0	S7ZDX2		4.37	0		0	2	MASCOT		T
	R16065_9_7451_1,8816	R.LFEGNALIR.R	1032.58	0.00079	2	1	31.59	0	0.0053	0|0	S7ZDX2/S7ZZH0		6	0		0	2	MASCOT		T
	R16065_9_7451_1,6258	R.VQLTLSK.I	788.488	0.00066	2	1	28.1	0	0.0108	0|0	S7ZDX2		8.72	0		0	2	MASCOT		T
31	tr|S7ZH61|S7ZH61_PENO1 Uncharacterized protein OS=Penicillium oxalicum (strain 114-2 / CGMCC 5302) GN=PDE_04579 PE=3 SV=1	5	5	0.0958	50152.8	4.98
	R16065_9_7451_1,4589	K.DAHAAVATLK.T	996.547	0.01181	3	1	35.36	0	0.00166	0|0	S7ZH61		6.74	0		0	2	MASCOT		T
	R16065_9_7451_1,3062	K.EDASNNYAR.G	1039.44	-0.00117	2	1	52.19	0	6.34e-06	0|0	S7ZH61		4.37	0		0	2	MASCOT		T
	R16065_9_7451_1,8371	K.EMIDQVLDK.V	1090.54	0.00045	2	1	45.14	0	0.000251	0|0	S7ZH61		4.03	0		0	2	MASCOT		T
	R16065_9_7451_1,6648	R.EDLAALER.D	916.473	0.00068	2	1	56.68	0	3.76e-05	0|0	S7ZH61		4.14	0		0	2	MASCOT		T
	R16065_9_7451_1,5206	R.LSVDYGK.K	781.409	-0.00368	2	1	21.96	0	0.14	0|0	S7ZH61		5.84	0		0	2	MASCOT		T
32	tr|S7ZNF5|S7ZNF5_PENO1 Uncharacterized protein OS=Penicillium oxalicum (strain 114-2 / CGMCC 5302) GN=PDE_05171 PE=4 SV=1	5	5	0.0646	92539.9	6.03
	R16065_9_7451_1,2572	K.RLEQEAR.S	901.485	-0.00076	2	1	26.51	0	0.0191	0|0	S7ZNF5		6.14	1		0	2	MASCOT		T
	R16065_9_7451_1,7982	K.SVGFDGTNDYLTSK.K	1503.7	0.00269	2	1	69.59	0	3.85e-07	0|0	S7ZNF5		4.21	0		0	2	MASCOT		T
	R16065_9_7451_1,2317	K.YCSDEHGR.E	1023.39	0.0007	2	1	44.01	0	9.93e-06	0|0	S7ZNF5		5.32	0		0	2	MASCOT		T
	R16065_9_7451_1,9690	R.GLGNEILSSPLR.T	1255.7	-0.00097	2	1	55.09	0	2e-05	0|0	S7ZNF5		6	0		0	2	MASCOT		T
	R16065_9_7451_1,7581	R.GLNSQLVPSVSDR.E	1371.72	0.00365	2	1	27.76	0	0.0134	0|0	S7ZNF5		5.84	0		0	2	MASCOT		T
33	tr|S7ZTZ7|S7ZTZ7_PENO1 Uncharacterized protein OS=Penicillium oxalicum (strain 114-2 / CGMCC 5302) GN=PDE_09149 PE=3 SV=1	5	5	0.0585	80071.4	4.92
	R16065_9_7451_1,9581	K.AVSQSPFLDTLK.Q	1305.7	0.00059	2	1	20.25	0	0.0854	0|0	S7ZTZ7		5.88	0		0	2	MASCOT		T
	R16065_9_7451_1,3792	K.VEEVDEEEEK.K	1234.53	-0.00062	2	1	23.11	0	0.011	0|0	S7ZTZ7		3.77	0		0	2	MASCOT		T
	R16065_9_7451_1,3345	K.VEEVDEEEEKK.E	1362.63	-0.00567	2	1	37.69	0	0.00137	0|0	S7ZTZ7		4.06	1		0	2	MASCOT		T
	R16065_9_7451_1,2163	K.VVVSHK.L	668.409	-0.00029	2	1	27.52	0	0.00159	0|0	S7ZTZ7		8.73	0		0	2	MASCOT		T
	R16065_9_7451_1,7032	R.ELISNASDALDK.I	1275.64	-0.01007	2	1	26.15	0	0.0604	0|0	S7ZTZ7		4.03	0		0	2	MASCOT		T
34	tr|S8AIB2|S8AIB2_PENO1 Uncharacterized protein OS=Penicillium oxalicum (strain 114-2 / CGMCC 5302) GN=PDE_00406 PE=3 SV=1	5	5	0.2057	23076	9.45
	R16065_9_7451_1,5245	K.AQCPIIER.L	986.509	-0.00397	2	1	30.86	0	0.011	0|0	S8AIB2		6.04	0		0	2	MASCOT		T
	R16065_9_7451_1,10218	K.EIAHLDNQPVLLFGK.W	1693.93	0.01172	3	1	27.17	0	0.0429	0|0	S8AIB2		5.32	0		0	2	MASCOT		T
	R16065_9_7451_1,2439	K.KKDELER.V	917.505	0.01231	2	1	22.12	0	0.186	0|0	S8AIB2		6.18	2		0	2	MASCOT		T
	R16065_9_7451_1,3104	R.ESSFR.S	625.294	0.00128	2	1	34.32	0	0.0046	0|0	S8AIB2		6.1	0		0	2	MASCOT		T
	R16065_9_7451_1,3258	R.IGSAGTVR.R	760.431	-0.00154	2	1	45.89	0	0.000505	0|0	S8AIB2		9.75	0		0	2	MASCOT		T
35	tr|S8ATF7|S8ATF7_PENO1 Uncharacterized protein OS=Penicillium oxalicum (strain 114-2 / CGMCC 5302) GN=PDE_04327 PE=4 SV=1	5	5	0.1794	25697.5	10.37
	R16065_9_7451_1,4788	K.EGFHMR.V	776.351	-5e-05	2	1	22.86	0	0.014	0|0	S8ATF7		6.85	0		0	2	MASCOT		T
	R16065_9_7451_1,4093	K.MLSCAGADR.L	980.429	-0.00392	2	1	35.22	0	0.0015	0|0	S8ATF7		5.59	0		0	2	MASCOT		T
	R16065_9_7451_1,6263	R.EEYVQLR.Q	936.479	0.00577	2	1	41.32	0	0.00109	0|0	S8ATF7		4.53	0		0	2	MASCOT		T
	R16065_9_7451_1,8281	R.IFDLGR.K	720.404	0.00073	2	1	24.61	0	0.0242	0|0	S8ATF7		5.84	0		0	2	MASCOT		T
	R16065_9_7451_1,7228	R.RFPDAYENVSQA.-	1396.65	-0.00357	2	1	26.78	0	0.019	0|0	S8ATF7		4.37	1		0	2	MASCOT		T
36	tr|S8AU45|S8AU45_PENO1 Uncharacterized protein OS=Penicillium oxalicum (strain 114-2 / CGMCC 5302) GN=PDE_00270 PE=3 SV=1	5	5	0.1787	27017.6	9.13
	R16065_9_7451_1,3672	K.ESQLPR.M	729.389	-0.00377	2	1	33.83	0	0.00797	0|0	S8AU45		6.1	0		0	2	MASCOT		T
	R16065_9_7451_1,5107	K.HVLLSPEEK.A	1051.58	0.00549	2	1	49.25	0	0.000233	0|0	S8AU45		5.4	0		0	2	MASCOT		T
	R16065_9_7451_1,8492	K.VSLEEFAR.K	950.494	-0.00081	2	1	34.94	0	0.00253	0|0	S8AU45		4.53	0		0	2	MASCOT		T
	R16065_9_7451_1,6329	R.GYEVSEEELK.V	1182.55	0.00218	2	1	33.39	0	0.00192	0|0	S8AU45		4.09	0		0	2	MASCOT		T
	R16065_9_7451_1,5540	R.MQVSDPVAR.Y	1002.5	-0.00903	2	1	33.06	0	0.00949	0|0	S8AU45		5.59	0		0	2	MASCOT		T
37	tr|S8B2S5|S8B2S5_PENO1 Uncharacterized protein OS=Penicillium oxalicum (strain 114-2 / CGMCC 5302) GN=PDE_08100 PE=3 SV=1	5	5	0.2968	17881.5	10.46
	R16065_9_7451_1,4996	K.DTQVVSNGLDSK.L	1262.62	0.00211	2	1	39.39	0	0.000811	0|0	S8B2S5		4.21	0		0	2	MASCOT		T
	R16065_9_7451_1,3243	K.KADVDLNK.R	902.494	0.00143	2	1	27.64	0	0.0336	0|0	S8B2S5		5.96	1		0	2	MASCOT		T
	R16065_9_7451_1,9241	K.TNFQYILR.L	1054.57	0.00117	2	1	33.85	0	0.00243	0|0	S8B2S5		8.41	0		0	2	MASCOT		T
	R16065_9_7451_1,6426	R.AGELTTEELER.I	1247.61	-0.00039	2	1	51.16	0	4.63e-05	0|0	S8B2S5		4.09	0		0	2	MASCOT		T
	R16065_9_7451_1,4741	R.YSNLVCK.K	883.434	0.00148	2	1	35.31	0	0.00508	0|0	S8B2S5		8.2	0		0	2	MASCOT		T
38	tr|S8BF19|S8BF19_PENO1 Uncharacterized protein OS=Penicillium oxalicum (strain 114-2 / CGMCC 5302) GN=PDE_08649 PE=4 SV=1	5	5	0.0676	93403.1	6.34
	R16065_9_7451_1,6174	K.DLEEDHAGVPLR.I	1350.66	0.00936	3	1	29.45	0	0.00681	0|0	S8BF19		4.31	0		0	2	MASCOT		T
	R16065_9_7451_1,6912	K.FSVSPVVQR.G	1018.57	-0.00088	2	1	36.26	0	0.00203	0|0	S8BF19		9.75	0		0	2	MASCOT		T
	R16065_9_7451_1,4676	K.SGTLTTDETAHNLK.V	1487.73	0.00818	3	1	33.41	0	0.00269	0|0	S8BF19		5.3	0		0	2	MASCOT		T
	R16065_9_7451_1,6622	K.STLSDSLVQR.A	1105.58	-0.00095	2	1	38.19	0	0.00159	0|0	S8BF19		5.55	0		0	2	MASCOT		T
	R16065_9_7451_1,5743	R.AETLYEGPTDDK.A	1338.61	-0.00677	2	1	49.6	0	7.35e-05	0|0	S8BF19		3.92	0		0	2	MASCOT		T
39	tr|S7ZSQ8|S7ZSQ8_PENO1 40S ribosomal protein S6 OS=Penicillium oxalicum (strain 114-2 / CGMCC 5302) GN=PDE_06703 PE=3 SV=1	5	4	0.1646	27115.3	10.76
	R16065_9_7451_1,2637	K.EGKPEYTK.A	951.478	-0.00254	2	1	32.28	0	0.0047	0|0	S7ZSQ8		6.24	0		0	2	MASCOT		T
	R16065_9_7451_1,7857	K.QGVLLPVR.T	881.557	0.00399	2	1	41.15	0	0.000146	0|0	S7ZSQ8		9.75	0		0	2	MASCOT		T
	R16065_9_7451_1,3035	R.EAANDYAK.L	881.4	-0.0001	2	1	25.86	0	0.00804	0|0	S7ZSQ8		4.37	0		0	2	MASCOT		T
	R16065_9_7451_1,7745	R.M*GTEVAGDSLGDEFK.G	1571.69	-0.00333	2	1	30.2	0	0.00506	0|0	S7ZSQ8		3.92	0	15.994919 Oxidation (M)	0	2	MASCOT		T
	R16065_9_7451_1,8302	R.MGTEVAGDSLGDEFK.G	1555.69	0.00175	2	1	25.51	0	0.018	0|0	S7ZSQ8		3.92	0		0	2	MASCOT		T
40	tr|S7Z599|S7Z599_PENO1 Uncharacterized protein OS=Penicillium oxalicum (strain 114-2 / CGMCC 5302) GN=PDE_00629 PE=4 SV=1	4	4	0.1878	22192.5	10.12
	R16065_9_7451_1,8969	K.AVDQSILSSIK.K	1160.65	0.00061	2	1	43.82	0	0.000322	0|0	S7Z599		5.88	0		0	2	MASCOT		T
	R16065_9_7451_1,6289	K.KTEEAFFK.Q	999.515	0.00183	2	1	29.66	0	0.0224	0|0	S7Z599		6.14	1		0	2	MASCOT		T
	R16065_9_7451_1,6836	R.IDIAGVDAK.T	901.499	0.00619	2	1	48.01	0	0.000376	0|0	S7Z599		4.21	0		0	2	MASCOT		T
	R16065_9_7451_1,2177	R.NGDKPHEMK.W	1055.49	0.00838	3	1	28.08	0	0.00521	0|0	S7Z599		6.75	0		0	2	MASCOT		T
41	tr|S7ZIP7|S7ZIP7_PENO1 Uncharacterized protein OS=Penicillium oxalicum (strain 114-2 / CGMCC 5302) GN=PDE_03512 PE=4 SV=1	4	4	0.2416	16716.4	10.58
	R16065_9_7451_1,9480	K.LAAIVEIVDHR.R	1235.71	0.00155	2	1	40.11	0	0.000346	0|0	S7ZIP7		5.32	0		0	2	MASCOT		T
	R16065_9_7451_1,7395	K.LVILR.R ! R.LVLIR.R ! R.LVLLR.I	613.44	0.00682	2	1	24.65	0	0.00257	0|0	S8AWE5 ! S7ZIP7 ! S8BHH4		9.75	0		0	2	MASCOT		T
	R16065_9_7451_1,2649	R.AAGTGPVK.K	700.399	0.00031	2	1	42.4	0	0.000302	0|0	S7ZIP7		8.8	0		0	2	MASCOT		T
	R16065_9_7451_1,4706	R.VLVDGPSGEEQK.I	1257.63	0.00188	2	1	30.96	0	0.00541	0|0	S7ZIP7		4.14	0		0	2	MASCOT		T
42	tr|S7ZK97|S7ZK97_PENO1 Uncharacterized protein OS=Penicillium oxalicum (strain 114-2 / CGMCC 5302) GN=PDE_04060 PE=4 SV=1	4	4	0.212	20702.9	11.73
	R16065_9_7451_1,10224	K.AGGETLTLDQLALR.A	1457.8	0.00032	2	1	42.88	0	0.000389	0|0	S7ZK97		4.37	0		0	2	MASCOT		T
	R16065_9_7451_1,2501	K.KPYVASK.G	792.461	-0.00013	2	1	32.89	0	0.00311	0|0	S7ZK97		9.7	0		0	2	MASCOT		T
	R16065_9_7451_1,8074	R.APTGANTLLLR.G	1126.66	-0.0002	2	1	48.8	0	5.4e-05	0|0	S7ZK97		9.8	0		0	2	MASCOT		T
	R16065_9_7451_1,2957	R.TESNFNK.A	839.389	0.00053	2	1	21.56	0	0.0258	0|0	S7ZK97		5.66	0		0	2	MASCOT		T
43	tr|S7ZLM9|S7ZLM9_PENO1 Uncharacterized protein OS=Penicillium oxalicum (strain 114-2 / CGMCC 5302) GN=PDE_06510 PE=3 SV=1	4	4	0.1056	33676.8	6.14
	R16065_9_7451_1,2476	K.LTCGNTGK.L	850.409	-0.00399	2	1	44.92	0	0.00039	0|0	S7ZLM9		8.22	0		0	2	MASCOT		T
	R16065_9_7451_1,3343	R.GQLEEAQR.V	930.464	-0.00881	2	1	21.2	0	0.113	0|0	S7ZLM9		4.53	0		0	2	MASCOT		T
	R16065_9_7451_1,8437	R.SCAAVMDLYER.G	1314.58	0.00894	2	1	43.7	0	0.000115	0|0	S7ZLM9		4.37	0		0	2	MASCOT		T
	R16065_9_7451_1,4423	R.VQAIVAR.A	756.473	-0.00038	2	1	24.39	0	0.0176	0|0	S7ZLM9		9.72	0		0	2	MASCOT		T
44	tr|S7ZUH5|S7ZUH5_PENO1 Uncharacterized protein OS=Penicillium oxalicum (strain 114-2 / CGMCC 5302) GN=PDE_09299 PE=3 SV=1	4	4	0.0852	37443	6.67
	R16065_9_7451_1,6634	K.APVFESVTK.M	977.53	-0.0025	2	1	43.01	0	0.00111	0|0	S7ZUH5		6.05	0		0	2	MASCOT		T
	R16065_9_7451_1,7509	K.DLIADVR.A	801.446	-0.00056	2	1	24.43	0	0.0406	0|0	S7ZUH5		4.21	0		0	2	MASCOT		T
	R16065_9_7451_1,3977	K.GGPPVYK.E	717.393	0.00028	2	1	21.84	0	0.213	0|0	S7ZUH5		8.59	0		0	2	MASCOT		T
	R16065_9_7451_1,3504	M.APQVPDK.Q	754.409	0.00019	2	1	23.96	0	0.0135	0|0	S7ZUH5		5.88	0		0	2	MASCOT		T
45	tr|S7ZWY0|S7ZWY0_PENO1 Uncharacterized protein OS=Penicillium oxalicum (strain 114-2 / CGMCC 5302) GN=PDE_08223 PE=4 SV=1	4	4	0.068	63586.2	4.85
	R16065_9_7451_1,7387	K.EGNPITFTPER.Y	1260.62	0.00916	2	1	26.29	0	0.0323	0|0	S7ZWY0		4.53	0		0	2	MASCOT		T
	R16065_9_7451_1,7175	K.GLQYHELESSIDK.E	1518.74	-0.00929	2	1	39.69	0	0.00175	0|0	S7ZWY0		4.65	0		0	2	MASCOT		T
	R16065_9_7451_1,2283	K.VKEDPDR.T	858.432	-0.00044	2	1	25.76	0	0.00942	0|0	S7ZWY0		4.56	1		0	2	MASCOT		T
	R16065_9_7451_1,3963	R.GGDPIATCK.A	918.435	-0.0004	2	1	25.59	0	0.0148	0|0	S7ZWY0		5.83	0		0	2	MASCOT		T
46	tr|S8AP99|S8AP99_PENO1 Uncharacterized protein OS=Penicillium oxalicum (strain 114-2 / CGMCC 5302) GN=PDE_02687 PE=4 SV=1	4	4	0.2164	15057.3	10.85
	R16065_9_7451_1,6295	K.DDEVTIVTGTNK.G	1291.64	0.00489	2	1	28.04	0	0.0326	0|0	S8AP99		4.03	0		0	2	MASCOT		T
	R16065_9_7451_1,4883	K.DREEILAR.K	1001.54	-0.00041	2	1	28.35	0	0.014	0|0	S8AP99		4.68	1		0	2	MASCOT		T
	R16065_9_7451_1,5367	R.KDDEVTIVTGTNK.G	1419.73	-0.00015	2	1	59.13	0	2.96e-05	0|0	S8AP99		4.56	1		0	2	MASCOT		T
	R16065_9_7451_1,3079	R.NTALASSR.S	819.432	0.0002	2	1	31.15	0	0.00702	0|0	S8AP99		9.75	0		0	2	MASCOT		T
47	tr|S8ATT7|S8ATT7_PENO1 Uncharacterized protein OS=Penicillium oxalicum (strain 114-2 / CGMCC 5302) GN=PDE_00175 PE=3 SV=1	4	4	0.2326	19284	6.17
	R16065_9_7451_1,4400	K.DQSNTEQAVETADK.A	1535.68	0.00925	2	1	96.52	0	1.03e-09	0|0	S8ATT7		3.92	0		0	2	MASCOT		T
	R16065_9_7451_1,2169	R.EYHHSSEPSK.D	1200.53	-0.00476	2	1	48.05	0	5.56e-05	0|0	S8ATT7		6.01	0		0	2	MASCOT		T
	R16065_9_7451_1,5073	R.LLDDYDNHR.S	1160.53	0.00032	2	1	53.76	0	1.24e-05	0|0	S8ATT7		4.41	0		0	2	MASCOT		T
	R16065_9_7451_1,2248	R.VDQDHVK.A	840.421	-0.00065	2	1	24.94	0	0.0154	0|0	S8ATT7		5.21	0		0	2	MASCOT		T
48	tr|S8AV92|S8AV92_PENO1 40S ribosomal protein S0 OS=Penicillium oxalicum (strain 114-2 / CGMCC 5302) GN=RPS0 PE=3 SV=1	4	4	0.1093	32351.9	4.79
	R16065_9_7451_1,4689	K.FATHTGATAIAGR.F	1273.66	0.0002	3	1	54.3	0	4.12e-05	0|0	S8AV92		9.76	0		0	2	MASCOT		T
	R16065_9_7451_1,5144	K.IVLAAR.I	642.43	-0.00302	2	1	21	0	0.0167	0|0	S8AV92		9.75	0		0	2	MASCOT		T
	R16065_9_7451_1,2458	R.DPEAEENK.E	931.4	0.00757	2	1	31.35	0	0.00154	0|0	S8AV92		4	0		0	2	MASCOT		T
	R16065_9_7451_1,2880	R.GTLATR.E	618.357	0.00422	2	1	20.03	0	0.179	0|0	S8AV92		9.75	0		0	2	MASCOT		T
49	tr|S8B7J5|S8B7J5_PENO1 Uncharacterized protein OS=Penicillium oxalicum (strain 114-2 / CGMCC 5302) GN=PDE_05649 PE=3 SV=1	4	4	0.1534	20166	10.07
	R16065_9_7451_1,5518	K.AEEILER.G	859.452	0.00081	2	1	39.88	0	0.000935	0|0	S8B7J5		4.25	0		0	2	MASCOT		T
	R16065_9_7451_1,2768	K.IHQTETMK.W	987.493	6e-05	2	1	20.32	0	0.185	0|0	S8B7J5		6.75	0		0	2	MASCOT		T
	R16065_9_7451_1,3129	K.TANPMR.E	689.34	-6e-05	2	1	27.95	0	0.00689	0|0	S8B7J5		9.41	0		0	2	MASCOT		T
	R16065_9_7451_1,6924	R.FDGIIR.-	720.404	0.00051	2	1	20.33	0	0.0649	0|0	S8B7J5		5.84	0		0	2	MASCOT		T
50	tr|S7ZCK1|S7ZCK1_PENO1 Serine/threonine-protein phosphatase OS=Penicillium oxalicum (strain 114-2 / CGMCC 5302) GN=PDE_02949 PE=3 SV=1	4	3	0.0864	37210.4	5.54
	R16065_9_7451_1,6768	K.DITGWSENDR.G	1192.52	-0.00982	2	1	26.83	0	0.0104	0|0	S7ZCK1		4.03	0		0	2	MASCOT		T
	R16065_9_7451_1,6211	K.HDMDLICR.A	1059.47	-0.0019	2	1	43.37	0	8.98e-05	0|0	S7ZCK1		5.21	0		0	2	MASCOT		T
	R16065_9_7451_1,2919	R.GNHECASINR.I	1157.51	-0.00141	2	1	20.33	0	0.0176	0|0	S7ZCK1		6.74	0		0	2	MASCOT		T
	R16065_9_7451_1,2936	R.GNHECASINR.I	1157.51	0.00033	3	1	39.07	0	0.000242	0|0	S7ZCK1		6.74	0		0	2	MASCOT		T
51	tr|S8AKA2|S8AKA2_PENO1 Uncharacterized protein OS=Penicillium oxalicum (strain 114-2 / CGMCC 5302) GN=PDE_01194 PE=4 SV=1	4	3	0.1366	24716	6.07
	R16065_9_7451_1,7594	K.HLASADNGFVALGR.L	1427.74	0.00626	2	1	35.95	0	0.00563	0|0	S8AKA2		6.74	0		0	2	MASCOT		T
	R16065_9_7451_1,7599	K.HLASADNGFVALGR.L	1427.74	-0.00069	3	1	33.19	0	0.00357	0|0	S8AKA2		6.74	0		0	2	MASCOT		T
	R16065_9_7451_1,3202	K.LAGNTPEER.A	986.49	-0.00016	2	1	48.94	0	5.17e-05	0|0	S8AKA2		4.53	0		0	2	MASCOT		T
	R16065_9_7451_1,5231	R.VPGLIDHK.N	878.509	-0.0033	2	1	24.91	0	0.0249	0|0	S8AKA2		6.71	0		0	2	MASCOT		T
52	tr|S7Z6E6|S7Z6E6_PENO1 Uncharacterized protein OS=Penicillium oxalicum (strain 114-2 / CGMCC 5302) GN=PDE_00638 PE=3 SV=1	3	3	0.0368	91817.4	6.29
	R16065_9_7451_1,6587	K.INNPTILAR.I	1011.59	-0.00066	2	1	33.26	0	0.00149	0|0	S7Z6E6		9.75	0		0	2	MASCOT		T
	R16065_9_7451_1,3873	K.SEDVEGMQK.F	1022.45	-0.00079	2	1	24.83	0	0.00756	0|0	S7Z6E6		4.14	0		0	2	MASCOT		T
	R16065_9_7451_1,8124	R.SVNYVNVVVADK.Q	1306.7	-0.00056	2	1	55.75	0	2.35e-05	0|0	S7Z6E6		5.55	0		0	2	MASCOT		T
53	tr|S7Z9U1|S7Z9U1_PENO1 Uncharacterized protein OS=Penicillium oxalicum (strain 114-2 / CGMCC 5302) GN=PDE_00374 PE=3 SV=1	3	3	0.0867	34605.5	8.63
	R16065_9_7451_1,7071	K.GASDGGIFIPHSER.R	1442.7	-0.01046	2	1	30.63	0	0.0108	0|0	S7Z9U1		5.32	0		0	2	MASCOT		T
	R16065_9_7451_1,4719	K.LGLADK.F	616.366	-0.00629	2	1	22.27	0	0.147	0|0	S7Z9U1		5.84	0		0	2	MASCOT		T
	R16065_9_7451_1,2046	K.LTHAER.K	726.389	-0.00343	2	1	35.48	0	0.00283	0|0	S7Z9U1		6.75	0		0	2	MASCOT		T
54	tr|S7ZBK5|S7ZBK5_PENO1 Uncharacterized protein OS=Penicillium oxalicum (strain 114-2 / CGMCC 5302) GN=PDE_01007 PE=4 SV=1	3	3	0.2129	16992.9	10.64
	R16065_9_7451_1,1929	K.KETPASKPR.G	1013.57	-0.00166	3	1	29.92	0	0.00453	0|0	S7ZBK5		9.99	1		0	2	MASCOT		T
	R16065_9_7451_1,2285	K.KPNNPQQPAK.N	1121.61	-0.00657	2	1	40.35	0	0.00189	0|0	S7ZBK5		10	0		0	2	MASCOT		T
	R16065_9_7451_1,5300	K.NQVVTTYGPSTSTR.K	1510.75	-0.00309	2	1	45.42	0	0.0004	0|0	S7ZBK5		8.75	0		0	2	MASCOT		T
55	tr|S7ZDJ2|S7ZDJ2_PENO1 Uncharacterized protein OS=Penicillium oxalicum (strain 114-2 / CGMCC 5302) GN=PDE_01695 PE=3 SV=1	3	3	0.181	13080.2	9.83
	R16065_9_7451_1,4119	K.EFGEGPK.V	763.362	0.00089	2	1	25.84	0	0.0112	0|0	S7ZDJ2		4.53	0		0	2	MASCOT		T
	R16065_9_7451_1,5407	K.TLTISTR.K	791.462	0.00942	2	1	28.83	0	0.0247	0|0	S7ZDJ2		9.41	0		0	2	MASCOT		T
	R16065_9_7451_1,2985	R.KVASLEK.V	774.472	7e-05	2	1	20.53	0	0.0704	0|0	S7ZDJ2		8.59	1		0	2	MASCOT		T
56	tr|S7ZH33|S7ZH33_PENO1 Uncharacterized protein OS=Penicillium oxalicum (strain 114-2 / CGMCC 5302) GN=PDE_02916 PE=3 SV=1	3	3	0.1635	24342.8	10.57
	R16065_9_7451_1,8675	K.ANGEIVSLNTITEK.R	1488.79	-0.00234	2	1	36.6	0	0.00283	0|0	S7ZH33		4.53	0		0	2	MASCOT		T
	R16065_9_7451_1,5538	K.VVEVTDNDSIR.R	1246.63	0.00011	2	1	30.75	0	0.00778	0|0	S7ZH33		4.03	0		0	2	MASCOT		T
	R16065_9_7451_1,6936	R.LNEYQVIGR.H	1091.58	0	2	1	36.58	0	0.00222	0|0	S7ZH33		6	0		0	2	MASCOT		T
57	tr|S7ZLZ4|S7ZLZ4_PENO1 Coronin OS=Penicillium oxalicum (strain 114-2 / CGMCC 5302) GN=PDE_06642 PE=3 SV=1	3	3	0.0758	64966.2	5.46
	R16065_9_7451_1,2599	K.KPVEPSAR.S	883.5	0.00685	2	1	29.19	0	0.0149	0|0	S7ZLZ4		8.75	0		0	2	MASCOT		T
	R16065_9_7451_1,5335	K.SPAPVSTTATNPSSSGDSSVPVSTVHK.E	2597.27	-0.00648	3	1	26.77	0	0.0417	0|0	S7ZLZ4		6.46	0		0	2	MASCOT		T
	R16065_9_7451_1,3623	R.SPVTESAPAR.V	1014.52	0.00871	2	1	32.06	0	0.00793	0|0	S7ZLZ4		5.72	0		0	2	MASCOT		T
58	tr|S7ZNE5|S7ZNE5_PENO1 Uncharacterized protein OS=Penicillium oxalicum (strain 114-2 / CGMCC 5302) GN=PDE_06792 PE=4 SV=1	3	3	0.1406	21766.8	9.67
	R16065_9_7451_1,6059	K.NAETGGTDIEIR.N	1275.62	-0.00612	2	1	44.39	0	0.000231	0|0	S7ZNE5		4.14	0		0	2	MASCOT		T
	R16065_9_7451_1,6638	R.LPIPDNVK.V	895.525	-0.00119	2	1	20.34	0	0.0268	0|0	S7ZNE5		5.84	0		0	2	MASCOT		T
	R16065_9_7451_1,2730	R.YIHSEER.L	933.442	4e-05	2	1	21.68	0	0.0421	0|0	S7ZNE5		5.4	0		0	2	MASCOT		T
59	tr|S8A1J3|S8A1J3_PENO1 Uncharacterized protein OS=Penicillium oxalicum (strain 114-2 / CGMCC 5302) GN=PDE_09981 PE=4 SV=1	3	3	0.0177	195482	6.97
	R16065_9_7451_1,5358	R.DSVSGNVEHASLGR.S	1427.69	-0.00538	2	1	87.41	0	3.59e-08	0|0	S8A1J3		5.32	0		0	2	MASCOT		T
	R16065_9_7451_1,9474	R.IGFFTEDR.R	984.479	-0.00056	2	1	28.18	0	0.00555	0|0	S8A1J3		4.37	0		0	2	MASCOT		T
	R16065_9_7451_1,3496	R.SQSLHSVESR.S	1129.56	0.00689	2	1	36.58	0	0.0047	0|0	S8A1J3		6.47	0		0	2	MASCOT		T
60	tr|S8AUJ8|S8AUJ8_PENO1 Tyrosine--tRNA ligase OS=Penicillium oxalicum (strain 114-2 / CGMCC 5302) GN=PDE_00455 PE=3 SV=1	3	3	0.0724	43188.2	5.83
	R16065_9_7451_1,7614	R.AILEAVGVSTDK.L	1202.66	0.0005	2	1	30.62	0	0.00789	0|0	S8AUJ8		4.37	0		0	2	MASCOT		T
	R16065_9_7451_1,8219	R.FDLIR.E	663.382	-0.00106	2	1	34.21	0	0.00186	0|0	S8AUJ8		5.84	0		0	2	MASCOT		T
	R16065_9_7451_1,4538	R.LAALTSEHDCR.K	1272.6	0.00737	2	1	23.66	0	0.0392	0|0	S8AUJ8		5.32	0		0	2	MASCOT		T
61	tr|S8AUT6|S8AUT6_PENO1 Uncharacterized protein OS=Penicillium oxalicum (strain 114-2 / CGMCC 5302) GN=PDE_04873 PE=3 SV=1	3	3	0.0598	62760.5	6
	R16065_9_7451_1,5468	K.LNVTSSPTINNK.V	1287.69	0.00055	2	1	43.47	0	0.000439	0|0	S8AUT6		8.75	0		0	2	MASCOT		T
	R16065_9_7451_1,8084	K.SDFNTAGFTYR.I	1278.57	0.00083	2	1	29.69	0	0.00365	0|0	S8AUT6		5.55	0		0	2	MASCOT		T
	R16065_9_7451_1,5778	K.VFGAGDGYQTR.R	1170.55	0.00061	2	1	56.98	0	9.72e-06	0|0	S8AUT6		5.81	0		0	2	MASCOT		T
62	tr|S8AYG9|S8AYG9_PENO1 Uncharacterized protein OS=Penicillium oxalicum (strain 114-2 / CGMCC 5302) GN=PDE_01963 PE=3 SV=1	3	3	0.0806	44837	5.03
	R16065_9_7451_1,4377	K.IDPNLK.A	699.404	-0.00918	2	1	25.48	0	0.0386	0|0	S8AYG9		5.84	0		0	2	MASCOT		T
	R16065_9_7451_1,5671	R.EGPQVVVGTPGR.V	1195.64	0.01026	2	1	34.04	0	0.00783	0|0	S8AYG9		6.1	0		0	2	MASCOT		T
	R16065_9_7451_1,4929	R.GNDVIAQAQSGTGK.T	1345.67	-0.00209	2	1	63.33	0	1.11e-05	0|0	S8AYG9		5.84	0		0	2	MASCOT		T
63	tr|S8AZV6|S8AZV6_PENO1 Uncharacterized protein OS=Penicillium oxalicum (strain 114-2 / CGMCC 5302) GN=PDE_02505 PE=3 SV=1	3	3	0.1081	28697.1	6.06
	R16065_9_7451_1,5447	R.LLDDYETHR.S	1161.55	0.00074	2	1	44.54	0	0.000612	0|0	S8AZV6		4.54	0		0	2	MASCOT		T
	R16065_9_7451_1,5612	R.SIGEFQR.T	836.426	-0.00056	2	1	22.99	0	0.0349	0|0	S8AZV6/S8AYU4		5.72	0		0	2	MASCOT		T
	R16065_9_7451_1,2979	R.SQAAPATPASSK.S	1115.57	-0.00052	2	1	35.7	0	0.00219	0|0	S8AZV6		8.47	0		0	2	MASCOT		T
64	tr|S8B4H6|S8B4H6_PENO1 Uncharacterized protein OS=Penicillium oxalicum (strain 114-2 / CGMCC 5302) GN=PDE_08705 PE=4 SV=1	3	3	0.097	36520.4	4.37
	R16065_9_7451_1,4601	K.GPLICK.L	687.386	-0.00692	2	1	23.8	0	0.123	0|0	S8B4H6		8.22	0		0	2	MASCOT		T
	R16065_9_7451_1,5439	K.NCEQDLEYTR.D	1327.56	0.00146	2	1	40.85	0	0.000115	0|0	S8B4H6		4.14	0		0	2	MASCOT		T
	R16065_9_7451_1,7563	R.VNDTIGDPVITDPEGK.G	1669.83	0.00115	2	1	62.56	0	3.74e-06	0|0	S8B4H6		3.84	0		0	2	MASCOT		T
65	tr|S8BFM7|S8BFM7_PENO1 6-phosphogluconate dehydrogenase, decarboxylating OS=Penicillium oxalicum (strain 114-2 / CGMCC 5302) GN=PDE_08859 PE=3 SV=1	3	3	0.0807	55461.5	5.93
	R16065_9_7451_1,7805	K.EIGDVFAK.W	878.462	0.00908	2	1	22.17	0	0.102	0|0	S8BFM7		4.37	0		0	2	MASCOT		T
	R16065_9_7451_1,7576	K.GINFVGSGVSGGEEGAR.Y	1592.77	0.00116	2	1	61.78	0	4.68e-06	0|0	S8BFM7		4.53	0		0	2	MASCOT		T
	R16065_9_7451_1,8608	R.AATILSGPTPEFTGDK.A	1604.82	0.00391	2	1	37.31	0	0.00266	0|0	S8BFM7		4.37	0		0	2	MASCOT		T
66	tr|S7Z3S5|S7Z3S5_PENO1 Uncharacterized protein OS=Penicillium oxalicum (strain 114-2 / CGMCC 5302) GN=PDE_00106 PE=4 SV=1	2	2	0.2188	10662.3	10.13
	R16065_9_7451_1,7059	K.ALADLEEQGQIK.K	1314.69	0.00568	2	1	32.04	0	0.00469	0|0	S7Z3S5		4.14	0		0	2	MASCOT		T
	R16065_9_7451_1,4850	K.AQHAVVFEK.S	1028.55	-0.00019	2	1	36.26	0	0.00117	0|0	S7Z3S5		6.79	0		0	2	MASCOT		T
67	tr|S7ZAJ1|S7ZAJ1_PENO1 Uncharacterized protein OS=Penicillium oxalicum (strain 114-2 / CGMCC 5302) GN=PDE_02569 PE=4 SV=1	2	2	0.1071	21881	6.23
	R16065_9_7451_1,4782	K.TSQSPVTAEQGEEVR.K	1617.77	-0.00126	2	1	65.09	0	5.1e-06	0|0	S7ZAJ1		4.25	0		0	2	MASCOT		T
	R16065_9_7451_1,2256	R.TNEGVR.E	675.342	0.00118	2	1	24.68	0	0.0334	0|0	S7ZAJ1		5.66	0		0	2	MASCOT		T
68	tr|S7ZAM6|S7ZAM6_PENO1 Uncharacterized protein OS=Penicillium oxalicum (strain 114-2 / CGMCC 5302) GN=PDE_00677 PE=3 SV=1	2	2	0.0358	50015.7	4.94
	R16065_9_7451_1,7359	R.FPGQLNSDLR.K	1146.59	-0.00253	2	1	30.97	0	0.0139	0|0	S7ZAM6		5.84	0		0	2	MASCOT		T
	R16065_9_7451_1,3884	R.GAYQYR.Q	757.363	-0.00266	2	1	24.46	0	0.0077	0|0	S7ZAM6		8.59	0		0	2	MASCOT		T
69	tr|S7ZB03|S7ZB03_PENO1 Uncharacterized protein OS=Penicillium oxalicum (strain 114-2 / CGMCC 5302) GN=PDE_00777 PE=3 SV=1	2	2	0.071	21052.9	5.57
	R16065_9_7451_1,2928	R.EEIQR.M ! R.EELQR.M	674.347	-0.00597	2	1	29.29	0	0.0243	0|0	S8AZQ4 ! S7ZB03		4.53	0		0	2	MASCOT		T
	R16065_9_7451_1,6334	R.MLNEDELR.D	1019.48	0.0015	2	1	43.98	0	0.000198	0|0	S7ZB03		4.14	0		0	2	MASCOT		T
70	tr|S7ZBG7|S7ZBG7_PENO1 40S ribosomal protein S8 OS=Penicillium oxalicum (strain 114-2 / CGMCC 5302) GN=PDE_02864 PE=3 SV=1	2	2	0.0995	22760.5	11.17
	R16065_9_7451_1,8954	K.SAVVQIDAAPFR.Q	1273.69	-0.00282	2	1	25.41	0	0.0561	0|0	S7ZBG7		5.55	0		0	2	MASCOT		T
	R16065_9_7451_1,2135	K.TAETTEEK.K	908.421	-0.00025	2	1	30.33	0	0.00468	0|0	S7ZBG7		4.25	0		0	2	MASCOT		T
71	tr|S7ZBI6|S7ZBI6_PENO1 Uncharacterized protein OS=Penicillium oxalicum (strain 114-2 / CGMCC 5302) GN=PDE_00987 PE=3 SV=1	2	2	0.0325	66875.1	5.23
	R16065_9_7451_1,4050	K.SSDEEFTK.K	942.405	-0.00765	2	1	31.79	0	0.00202	0|0	S7ZBI6		4.14	0		0	2	MASCOT		T
	R16065_9_7451_1,8104	K.VDEIVLVGGSTR.I	1244.68	0.01178	2	1	26.65	0	0.0317	0|0	S7ZBI6		4.37	0		0	2	MASCOT		T
72	tr|S7ZBY0|S7ZBY0_PENO1 Uncharacterized protein OS=Penicillium oxalicum (strain 114-2 / CGMCC 5302) GN=PDE_02693 PE=4 SV=1	2	2	0.1345	13525.8	10.88
	R16065_9_7451_1,2004	R.GHVKPVR.C	792.484	0.00022	2	1	34.49	0	0.000942	0|0	S7ZBY0		11	0		0	2	MASCOT		T
	R16065_9_7451_1,5854	R.NMVESAAIR.D	990.504	-0.00906	2	1	31.26	0	0.0126	0|0	S7ZBY0		6	0		0	2	MASCOT		T
73	tr|S7ZCN6|S7ZCN6_PENO1 Uncharacterized protein OS=Penicillium oxalicum (strain 114-2 / CGMCC 5302) GN=PDE_02985 PE=4 SV=1	2	2	0.0449	35961.7	5.65
	R16065_9_7451_1,8125	K.IDFLEK.E	764.419	-0.00038	2	1	24.1	0	0.0278	0|0	S7ZCN6		4.37	0		0	2	MASCOT		T
	R16065_9_7451_1,2571	R.SRDEEYQGK.L	1111.5	0.00045	2	1	31.47	0	0.00171	0|0	S7ZCN6		4.68	1		0	2	MASCOT		T
74	tr|S7ZFW5|S7ZFW5_PENO1 Isocitrate dehydrogenase [NAD] subunit, mitochondrial OS=Penicillium oxalicum (strain 114-2 / CGMCC 5302) GN=PDE_02494 PE=3 SV=1	2	2	0.0443	41932.6	8.88
	R16065_9_7451_1,5795	R.ESLASLK.R	747.425	-0.00806	2	1	32.96	0	0.00774	0|0	S7ZFW5		6.1	0		0	2	MASCOT		T
	R16065_9_7451_1,3949	R.HLGLDDHANR.I	1147.56	0.00148	3	1	31.16	0	0.00521	0|0	S7ZFW5		5.98	0		0	2	MASCOT		T
75	tr|S7ZGT8|S7ZGT8_PENO1 Uncharacterized protein OS=Penicillium oxalicum (strain 114-2 / CGMCC 5302) GN=PDE_02785 PE=3 SV=1	2	2	0.0603	34140.2	9.83
	R16065_9_7451_1,8328	K.LLIQNQDEMLK.Q	1344.72	-0.00027	2	1	33.34	0	0.00447	0|0	S7ZGT8		4.37	0		0	2	MASCOT		T
	R16065_9_7451_1,3728	K.TAAAPIER.V	828.457	-0.0002	2	1	44.66	0	0.000166	0|0	S7ZGT8		5.66	0		0	2	MASCOT		T
76	tr|S7ZIC3|S7ZIC3_PENO1 Uncharacterized protein OS=Penicillium oxalicum (strain 114-2 / CGMCC 5302) GN=PDE_03382 PE=4 SV=1	2	2	0.1138	18279.5	5.33
	R16065_9_7451_1,7074	K.SIGWADAEGR.T	1061.5	-0.01169	2	1	21.14	0	0.155	0|0	S7ZIC3		4.37	0		0	2	MASCOT		T
	R16065_9_7451_1,5828	R.YAIVIDHGK.V ! R.YAIVIDHGK.I	1015.56	0.00437	2	1	20.52	0	0.204	0|0	S7ZIC3 ! S7ZCM4		6.74	0		0	2	MASCOT		T
77	tr|S7ZID6|S7ZID6_PENO1 Uncharacterized protein OS=Penicillium oxalicum (strain 114-2 / CGMCC 5302) GN=PDE_03397 PE=4 SV=1	2	2	0.1203	17624.2	11.41
	R16065_9_7451_1,8199	K.SESLFLQR.K	979.521	0.00798	2	1	37.18	0	0.00481	0|0	S7ZID6		5.72	0		0	2	MASCOT		T
	R16065_9_7451_1,7994	R.AIVGASLEQIK.E	1128.66	-0.00059	2	1	49.19	0	9.1e-05	0|0	S7ZID6		6.05	0		0	2	MASCOT		T
78	tr|S7ZIT4|S7ZIT4_PENO1 Uncharacterized protein OS=Penicillium oxalicum (strain 114-2 / CGMCC 5302) GN=PDE_05144 PE=4 SV=1	2	2	0.08	22643.7	10.11
	R16065_9_7451_1,2772	K.IATNSPSR.Q	845.448	-0.00019	2	1	50.38	0	9.99e-05	0|0	S7ZIT4		9.75	0		0	2	MASCOT		T
	R16065_9_7451_1,2597	R.EVEVGHGK.K	854.437	0.00051	2	1	25.57	0	0.013	0|0	S7ZIT4		5.4	0		0	2	MASCOT		T
79	tr|S7ZJ90|S7ZJ90_PENO1 Uncharacterized protein OS=Penicillium oxalicum (strain 114-2 / CGMCC 5302) GN=PDE_05280 PE=3 SV=1	2	2	0.0579	29084.3	4.76
	R16065_9_7451_1,2893	K.LAEQAER.Y	816.421	0.00017	2	1	45.04	0	0.000226	0|0	S7ZJ90		4.53	0		0	2	MASCOT		T
	R16065_9_7451_1,4736	R.IVTSIEQK.E	917.53	-0.00251	2	1	32.04	0	0.0095	0|0	S7ZJ90		6	0		0	2	MASCOT		T
80	tr|S7ZJL1|S7ZJL1_PENO1 Succinyl-CoA ligase subunit beta OS=Penicillium oxalicum (strain 114-2 / CGMCC 5302) GN=PDE_05762 PE=3 SV=1	2	2	0.0428	47806.2	5.39
	R16065_9_7451_1,3756	K.AQVLAGGR.G	771.447	-0.00557	2	1	25.88	0	0.032	0|0	S7ZJL1		9.8	0		0	2	MASCOT		T
	R16065_9_7451_1,4025	R.DVSQEDADEVK.A	1234.54	-0.0015	2	1	42.36	0	0.00011	0|0	S7ZJL1		3.77	0		0	2	MASCOT		T
81	tr|S7ZL29|S7ZL29_PENO1 Uncharacterized protein OS=Penicillium oxalicum (strain 114-2 / CGMCC 5302) GN=PDE_05983 PE=3 SV=1	2	2	0.0695	28214.4	10.54
	R16065_9_7451_1,7657	K.LAVLPVR.R	767.514	0.00129	2	1	28.84	0	0.000392	0|0	S7ZL29		9.75	0		0	2	MASCOT		T
	R16065_9_7451_1,5628	R.GTGLVASPAVK.R	999.583	0.00024	2	1	28.9	0	0.00754	0|0	S7ZL29		8.75	0		0	2	MASCOT		T
82	tr|S7ZPL2|S7ZPL2_PENO1 ATP synthase subunit beta OS=Penicillium oxalicum (strain 114-2 / CGMCC 5302) GN=PDE_07279 PE=3 SV=1	2	2	0.0405	55580.7	5.16
	R16065_9_7451_1,9292	K.IGLFGGAGVGK.T	975.562	0.00948	2	1	34.66	0	0.00494	0|0	S7ZPL2		8.75	0		0	2	MASCOT		T
	R16065_9_7451_1,10176	K.VVDLLAPYAR.G	1116.64	-0.00017	2	1	38.41	0	0.00131	0|0	S7ZPL2		5.81	0		0	2	MASCOT		T
83	tr|S7ZR20|S7ZR20_PENO1 Uncharacterized protein OS=Penicillium oxalicum (strain 114-2 / CGMCC 5302) GN=PDE_08142 PE=4 SV=1	2	2	0.1557	13656.5	10.43
	R16065_9_7451_1,5491	R.AFAEQAMGTK.D	1053.5	-0.00054	2	1	38.24	0	0.000645	0|0	S7ZR20		6.05	0		0	2	MASCOT		T
	R16065_9_7451_1,6336	R.SAISDVVSR.E	933.5	-0.0011	2	1	26	0	0.0269	0|0	S7ZR20		5.55	0		0	2	MASCOT		T
84	tr|S7ZRA0|S7ZRA0_PENO1 Putative alpha-1,2 / alpha-1,6-mannosyltransferase OS=Penicillium oxalicum (strain 114-2 / CGMCC 5302) GN=PDE_06141 PE=4 SV=1	2	2	0.0389	47151.9	6.09
	R16065_9_7451_1,9957	R.AVLVLLTR.T	884.593	3e-05	2	1	34.06	0	0.000667	0|0	S7ZRA0		9.8	0		0	2	MASCOT		T
	R16065_9_7451_1,1983	R.IQNHADEK.V	954.464	0.01119	2	1	23.39	0	0.0476	0|0	S7ZRA0		5.32	0		0	2	MASCOT		T
85	tr|S7ZS64|S7ZS64_PENO1 Uncharacterized protein OS=Penicillium oxalicum (strain 114-2 / CGMCC 5302) GN=PDE_08216 PE=4 SV=1	2	2	0.0628	23500.3	9.87
	R16065_9_7451_1,4769	R.EGVLVAK.K	715.435	0.00213	2	1	33.36	0	0.00976	0|0	S7ZS64		6.1	0		0	2	MASCOT		T
	R16065_9_7451_1,1912	R.SHAPPR.G	664.353	0.00036	2	1	27.8	0	0.0132	0|0	S7ZS64		9.49	0		0	2	MASCOT		T
86	tr|S7ZUW9|S7ZUW9_PENO1 Nucleoside diphosphate kinase OS=Penicillium oxalicum (strain 114-2 / CGMCC 5302) GN=PDE_09504 PE=3 SV=1	2	2	0.1457	16487.7	7.77
	R16065_9_7451_1,8000	R.GLVGPIISR.F	911.567	-0.00545	2	1	30.83	0	0.00207	0|0	S7ZUW9		9.75	0		0	2	MASCOT		T
	R16065_9_7451_1,2948	R.NVCHGSDSVENAK.K	1416.62	0.00449	2	1	46.84	0	4.24e-05	0|0	S7ZUW9		5.32	0		0	2	MASCOT		T
87	tr|S7ZVJ9|S7ZVJ9_PENO1 Transaldolase OS=Penicillium oxalicum (strain 114-2 / CGMCC 5302) GN=PDE_09398 PE=4 SV=1	2	2	0.0494	35464.1	5.85
	R16065_9_7451_1,5848	K.FAADAETLK.D	965.494	-0.00089	2	1	34.51	0	0.00248	0|0	S7ZVJ9		4.37	0		0	2	MASCOT		T
	R16065_9_7451_1,8772	R.LLVEFGK.E	805.482	0.00908	2	1	20.09	0	0.0989	0|0	S7ZVJ9		6	0		0	2	MASCOT		T
88	tr|S8ATH3|S8ATH3_PENO1 Uncharacterized protein OS=Penicillium oxalicum (strain 114-2 / CGMCC 5302) GN=PDE_00053 PE=3 SV=1	2	2	0.0944	20231.8	4.81
	R16065_9_7451_1,3116	K.SNAPAAMK.K	789.392	-0.00041	2	1	25.07	0	0.061	0|0	S8ATH3		8.47	0		0	2	MASCOT		T
	R16065_9_7451_1,2897	K.TEEGLKPSK.D	988.531	-0.0006	2	1	25.76	0	0.0296	0|0	S8ATH3		5.81	0		0	2	MASCOT		T
89	tr|S8AUW1|S8AUW1_PENO1 Uncharacterized protein OS=Penicillium oxalicum (strain 114-2 / CGMCC 5302) GN=PDE_00581 PE=4 SV=1	2	2	0.0526	52764.8	5.37
	R16065_9_7451_1,4784	R.AQPTGGSDMDPAAAAK.Q	1487.68	0.00675	2	1	26.16	0	0.0185	0|0	S8AUW1		4.21	0		0	2	MASCOT		T
	R16065_9_7451_1,6950	R.DLLINSSDR.V	1032.53	-0.00073	2	1	34.5	0	0.00679	0|0	S8AUW1		4.21	0		0	2	MASCOT		T
90	tr|S8AUZ3|S8AUZ3_PENO1 Serine hydroxymethyltransferase OS=Penicillium oxalicum (strain 114-2 / CGMCC 5302) GN=PDE_04963 PE=3 SV=1	2	2	0.0426	51807.7	7.64
	R16065_9_7451_1,6128	K.ALENEFK.A	850.43	-0.00043	2	1	25.54	0	0.0232	0|0	S8AUZ3		4.53	0		0	2	MASCOT		T
	R16065_9_7451_1,9021	R.AVFDALGSPMCNK.Y	1409.66	0.00246	2	1	47.73	0	0.000204	0|0	S8AUZ3		5.87	0		0	2	MASCOT		T
91	tr|S8AY44|S8AY44_PENO1 Uncharacterized protein OS=Penicillium oxalicum (strain 114-2 / CGMCC 5302) GN=PDE_01807 PE=4 SV=1	2	2	0.1063	18332.9	10.28
	R16065_9_7451_1,8407	K.SSVGVLLYK.R	965.567	0.0005	2	1	33.91	0	0.00122	0|0	S8AY44		8.31	0		0	2	MASCOT		T
	R16065_9_7451_1,7323	R.VGDIVDLK.V	858.493	-0.00271	2	1	34.17	0	0.00473	0|0	S8AY44		4.21	0		0	2	MASCOT		T
92	tr|S8AY53|S8AY53_PENO1 40S ribosomal protein S4 OS=Penicillium oxalicum (strain 114-2 / CGMCC 5302) GN=PDE_01817 PE=3 SV=1	2	2	0.0728	29305.8	10.24
	R16065_9_7451_1,6794	K.DAIDNTFATR.E	1123.54	-0.00114	2	1	48.24	0	8.25e-05	0|0	S8AY53		4.21	0		0	2	MASCOT		T
	R16065_9_7451_1,5720	R.IQAEEAEFK.L	1064.53	-0.00331	2	1	51.91	0	5.6e-05	0|0	S8AY53		4.25	0		0	2	MASCOT		T
93	tr|S8AYZ5|S8AYZ5_PENO1 Malate dehydrogenase OS=Penicillium oxalicum (strain 114-2 / CGMCC 5302) GN=PDE_02150 PE=3 SV=1	2	2	0.05	35884.6	7.71
	R16065_9_7451_1,8962	K.DQGVDFFASK.V	1113.52	0.00061	2	1	29.45	0	0.00403	0|0	S8AYZ5		4.21	0		0	2	MASCOT		T
	R16065_9_7451_1,7989	R.FAESLLR.A	835.467	-0.00552	2	1	23.78	0	0.0614	0|0	S8AYZ5		6	0		0	2	MASCOT		T
94	tr|S8B364|S8B364_PENO1 Uncharacterized protein OS=Penicillium oxalicum (strain 114-2 / CGMCC 5302) GN=PDE_03843 PE=3 SV=1	2	2	0.1399	15860.2	10.19
	R16065_9_7451_1,10297	K.VYEPLLIVGADK.F	1316.75	-0.00189	2	1	52.49	0	3.02e-05	0|0	S8B364		4.37	0		0	2	MASCOT		T
	R16065_9_7451_1,5916	R.TLLVADNR.R	901.51	-0.00046	2	1	35.24	0	0.00362	0|0	S8B364		5.5	0		0	2	MASCOT		T
95	tr|S8B6H1|S8B6H1_PENO1 Uncharacterized protein OS=Penicillium oxalicum (strain 114-2 / CGMCC 5302) GN=PDE_05203 PE=3 SV=1	2	2	0.1063	18581.4	10.72
	R16065_9_7451_1,7463	K.EVGLGFR.T	777.425	-0.001	2	1	40.54	0	0.000658	0|0	S8B6H1		6.1	0		0	2	MASCOT		T
	R16065_9_7451_1,6129	K.TAIEGTYIDK.K	1110.57	-0.00501	2	1	63	0	7.29e-06	0|0	S8B6H1		4.37	0		0	2	MASCOT		T
96	tr|S8BDR1|S8BDR1_PENO1 GTP-binding nuclear protein OS=Penicillium oxalicum (strain 114-2 / CGMCC 5302) GN=PDE_08134 PE=3 SV=1	2	2	0.0977	24229.4	6.53
	R16065_9_7451_1,6504	K.LVLVGDGGTGK.T	1015.58	0.00554	2	1	22.91	0	0.101	0|0	S8BDR1		5.84	0		0	2	MASCOT		T
	R16065_9_7451_1,7455	K.NLQYYDISAK.S	1214.61	-0.00184	2	1	23.82	0	0.023	0|0	S8BDR1		5.83	0		0	2	MASCOT		T
97	tr|S8BDV0|S8BDV0_PENO1 Uncharacterized protein OS=Penicillium oxalicum (strain 114-2 / CGMCC 5302) GN=PDE_08174 PE=4 SV=1	2	2	0.0722	29423.2	10.21
	R16065_9_7451_1,9376	K.TSAVLALTEVR.A	1159.67	-0.00462	2	1	42.61	0	0.00045	0|0	S8BDV0		5.66	0		0	2	MASCOT		T
	R16065_9_7451_1,3904	R.NTAAQTFK.L	880.452	-0.00089	2	1	20.42	0	0.064	0|0	S8BDV0		8.75	0		0	2	MASCOT		T
98	tr|S8BDX8|S8BDX8_PENO1 Uncharacterized protein OS=Penicillium oxalicum (strain 114-2 / CGMCC 5302) GN=PDE_08209 PE=4 SV=1	2	2	0.0776	26929.1	5.68
	R16065_9_7451_1,2743	K.HQGTPAGEVK.N	1023.52	-0.00022	2	1	50.06	0	5.82e-05	0|0	S8BDX8		6.75	0		0	2	MASCOT		T
	R16065_9_7451_1,3031	R.HESEETLAK.T	1043.5	-0.00015	2	1	28.78	0	0.00569	0|0	S8BDX8		4.75	0		0	2	MASCOT		T
99	tr|S8BH06|S8BH06_PENO1 Uncharacterized protein OS=Penicillium oxalicum (strain 114-2 / CGMCC 5302) GN=PDE_09361 PE=4 SV=1	2	2	0.0909	27345.2	10.97
	R16065_9_7451_1,6011	R.TSGNYVTVIGHNEDGK.T	1690.8	-0.00961	2	1	46.2	0	0.000284	0|0	S8BH06		5.29	0		0	2	MASCOT		T
	R16065_9_7451_1,2337	R.YAAQGQK.A	765.389	0.00051	2	1	28.36	0	0.0106	0|0	S8BH06		8.59	0		0	2	MASCOT		T
100	tr|S8BIB3|S8BIB3_PENO1 Glyceraldehyde-3-phosphate dehydrogenase OS=Penicillium oxalicum (strain 114-2 / CGMCC 5302) GN=PDE_09952 PE=3 SV=1	2	2	0.0593	36140.5	6.32
	R16065_9_7451_1,9186	K.AGIALNSNFIK.L	1147.65	0.00047	2	1	48.01	0	9.01e-05	0|0	S8BIB3		8.8	0		0	2	MASCOT		T
	R16065_9_7451_1,3551	K.YDSTHGQFK.G	1082.49	-0.00035	2	1	29.64	0	0.00348	0|0	S8BIB3		6.74	0		0	2	MASCOT		T
101	tr|S7ZNF1|S7ZNF1_PENO1 Uncharacterized protein OS=Penicillium oxalicum (strain 114-2 / CGMCC 5302) GN=PDE_05166 PE=4 SV=1	2	1	0.0058	114067	5.75
	R16065_9_7451_1,5424	K.AEALLR.T	672.404	0.00044	2	1	23.54	0	0.0549	0|0	S7ZNF1		6.05	0		0	2	MASCOT		T
	R16065_9_7451_1,5594	K.AEALLR.T	672.404	-4e-05	2	1	23.38	0	0.0569	0|0	S7ZNF1		6.05	0		0	2	MASCOT		T
102	tr|S7Z3U0|S7Z3U0_PENO1 Alpha-1,4 glucan phosphorylase OS=Penicillium oxalicum (strain 114-2 / CGMCC 5302) GN=PDE_00122 PE=3 SV=1	1	1	0.0102	100950	5.56
	R16065_9_7451_1,10162	R.DGLADLGFR.I	963.489	-0.0033	2	1	20.2	0	0.243	0|0	S7Z3U0		4.21	0		0	2	MASCOT		T
103	tr|S7Z4X7|S7Z4X7_PENO1 Uncharacterized protein OS=Penicillium oxalicum (strain 114-2 / CGMCC 5302) GN=PDE_00509 PE=4 SV=1	1	1	0.0221	44124.3	4.42
	R16065_9_7451_1,2508	R.VGNDESAAR.S	918.428	7e-05	2	1	51.83	0	2.72e-05	0|0	S7Z4X7		4.37	0		0	2	MASCOT		T
104	tr|S7Z506|S7Z506_PENO1 Uncharacterized protein OS=Penicillium oxalicum (strain 114-2 / CGMCC 5302) GN=PDE_00544 PE=4 SV=1	1	1	0.0042	178893	9.28
	R16065_9_7451_1,2596	K.AGGGTIR.R	631.352	-0.00052	2	1	22.22	0	0.19	0|0	S7Z506		9.8	0		0	2	MASCOT		T
105	tr|S7Z6G2|S7Z6G2_PENO1 Uncharacterized protein OS=Penicillium oxalicum (strain 114-2 / CGMCC 5302) GN=PDE_00660 PE=4 SV=1	1	1	0.0246	40726.4	5.12
	R16065_9_7451_1,7690	K.ILAVIADSR.N	957.573	0.00183	2	1	38.56	0	0.00105	0|0	S7Z6G2		5.84	0		0	2	MASCOT		T
106	tr|S7Z6S2|S7Z6S2_PENO1 Uncharacterized protein OS=Penicillium oxalicum (strain 114-2 / CGMCC 5302) GN=PDE_01191 PE=4 SV=1	1	1	0.0281	27358.6	5.63
	R16065_9_7451_1,5086	R.IGQLVDR.A	800.462	0.00975	2	1	27.97	0	0.019	0|0	S7Z6S2		5.84	0		0	2	MASCOT		T
107	tr|S7Z6Z5|S7Z6Z5_PENO1 Uncharacterized protein OS=Penicillium oxalicum (strain 114-2 / CGMCC 5302) GN=PDE_00840 PE=4 SV=1	1	1	0.0209	42736.1	7.13
	R16065_9_7451_1,6934	K.FDYVQPVR.A	1023.53	-0.00691	2	1	32.71	0	0.0125	0|0	S7Z6Z5		5.84	0		0	2	MASCOT		T
108	tr|S7Z7C6|S7Z7C6_PENO1 Uncharacterized protein OS=Penicillium oxalicum (strain 114-2 / CGMCC 5302) GN=PDE_01005 PE=4 SV=1	1	1	0.024	39628.2	6.98
	R16065_9_7451_1,7899	R.FGTLTNLPK.V	990.562	0.00321	2	1	37.35	0	0.0016	0|0	S7Z7C6		8.75	0		0	2	MASCOT		T
109	tr|S7Z7Z2|S7Z7Z2_PENO1 Succinate dehydrogenase [ubiquinone] flavoprotein subunit, mitochondrial OS=Penicillium oxalicum (strain 114-2 / CGMCC 5302) GN=PDE_01648 PE=3 SV=1	1	1	0.0185	71177	6.19
	R16065_9_7451_1,4856	K.ELASDAGAQSIK.D	1189.61	-0.00685	2	1	23.36	0	0.113	0|0	S7Z7Z2		4.37	0		0	2	MASCOT		T
110	tr|S7Z8W0|S7Z8W0_PENO1 Palmitoyltransferase OS=Penicillium oxalicum (strain 114-2 / CGMCC 5302) GN=PDE_01582 PE=3 SV=1	1	1	0.0082	67884.2	9.65
	R16065_9_7451_1,2060	R.LQAHR.G	624.358	0.00488	2	1	24.57	0	0.0395	0|0	S7Z8W0		9.76	0		0	2	MASCOT		T
111	tr|S7Z934|S7Z934_PENO1 Uncharacterized protein OS=Penicillium oxalicum (strain 114-2 / CGMCC 5302) GN=PDE_01657 PE=4 SV=1	1	1	0.0157	53560.8	5.1
	R16065_9_7451_1,3046	R.GGGGFGGR.G	664.316	-5e-05	2	1	23.01	0	0.0255	0|0	S7Z934		9.75	0		0	2	MASCOT		T
112	tr|S7Z9R6|S7Z9R6_PENO1 Isocitrate dehydrogenase [NADP] OS=Penicillium oxalicum (strain 114-2 / CGMCC 5302) GN=PDE_01899 PE=3 SV=1	1	1	0.0139	56024.2	8.97
	R16065_9_7451_1,7524	R.EPIIIPR.I	837.519	-0.00124	2	1	22.97	0	0.00934	0|0	S7Z9R6		6.1	0		0	2	MASCOT		T
113	tr|S7Z9U4|S7Z9U4_PENO1 Uncharacterized protein OS=Penicillium oxalicum (strain 114-2 / CGMCC 5302) GN=PDE_01935 PE=4 SV=1	1	1	0.0315	32508.5	5.25
	R16065_9_7451_1,6051	K.LNDIEDVER.H	1102.54	0.00475	2	1	23.51	0	0.0519	0|0	S7Z9U4		3.92	0		0	2	MASCOT		T
114	tr|S7Z9Y7|S7Z9Y7_PENO1 Uncharacterized protein OS=Penicillium oxalicum (strain 114-2 / CGMCC 5302) GN=PDE_02328 PE=4 SV=1	1	1	0.0327	27243.3	5.99
	R16065_9_7451_1,5580	K.LPADIADR.W	870.468	-0.00479	2	1	28.93	0	0.0132	0|0	S7Z9Y7		4.21	0		0	2	MASCOT		T
115	tr|S7ZA03|S7ZA03_PENO1 Uncharacterized protein OS=Penicillium oxalicum (strain 114-2 / CGMCC 5302) GN=PDE_00444 PE=3 SV=1	1	1	0.026	32140.7	9.3
	R16065_9_7451_1,2831	K.NSLSDGAK.T	791.389	-0.00337	2	1	22.57	0	0.116	0|0	S7ZA03		5.84	0		0	2	MASCOT		T
116	tr|S7ZAL9|S7ZAL9_PENO1 Uncharacterized protein OS=Penicillium oxalicum (strain 114-2 / CGMCC 5302) GN=PDE_02599 PE=4 SV=1	1	1	0.0375	18250.2	10.71
	R16065_9_7451_1,5141	R.VAIITR.G	672.44	0.00755	2	1	27.02	0	0.0111	0|0	S7ZAL9		9.72	0		0	2	MASCOT		T
117	tr|S7ZAT4|S7ZAT4_PENO1 Uncharacterized protein OS=Penicillium oxalicum (strain 114-2 / CGMCC 5302) GN=PDE_02267 PE=4 SV=1	1	1	0.038	36094.5	4.21
	R16065_9_7451_1,7038	K.AGDLLNNSSLQER.G	1416.71	-0.00501	2	1	34.87	0	0.0052	0|0	S7ZAT4		4.37	0		0	2	MASCOT		T
118	tr|S7ZAU5|S7ZAU5_PENO1 Uncharacterized protein OS=Penicillium oxalicum (strain 114-2 / CGMCC 5302) GN=PDE_02272 PE=4 SV=1	1	1	0.0059	93211.5	9.03
	R16065_9_7451_1,3278	K.EGYVR.C	623.315	0.00202	2	1	30.27	0	0.0203	0|0	S7ZAU5		6.1	0		0	2	MASCOT		T
119	tr|S7ZBA7|S7ZBA7_PENO1 Uncharacterized protein OS=Penicillium oxalicum (strain 114-2 / CGMCC 5302) GN=PDE_00902 PE=4 SV=1	1	1	0.0714	14162.2	8.79
	R16065_9_7451_1,5200	K.KIEVEVDTR.L	1088.59	0.00188	2	1	31.43	0	0.011	0|0	S7ZBA7		4.68	1		0	2	MASCOT		T
120	tr|S7ZBF5|S7ZBF5_PENO1 Eukaryotic translation initiation factor 5A OS=Penicillium oxalicum (strain 114-2 / CGMCC 5302) GN=PDE_02849 PE=3 SV=1	1	1	0.0566	17421.5	5.21
	R16065_9_7451_1,4397	K.LPEGDVGAR.I	913.474	0.0041	2	1	34.03	0	0.00166	0|0	S7ZBF5		4.37	0		0	2	MASCOT		T
121	tr|S7ZBQ9|S7ZBQ9_PENO1 Uncharacterized protein OS=Penicillium oxalicum (strain 114-2 / CGMCC 5302) GN=PDE_02986 PE=4 SV=1	1	1	0.0049	178873	9.03
	R16065_9_7451_1,2633	K.SGEAKNGK.A	790.405	0.01155	2	1	22.3	0	0.0489	0|0	S7ZBQ9		8.31	1		0	2	MASCOT		T
122-1	tr|S7ZC48|S7ZC48_PENO1 Uncharacterized protein OS=Penicillium oxalicum (strain 114-2 / CGMCC 5302) GN=PDE_01217 PE=3 SV=1	1	1	0.0037	178725	6.22
122-2	tr|S7Z8I6|S7Z8I6_PENO1 Uncharacterized protein OS=Penicillium oxalicum (strain 114-2 / CGMCC 5302) GN=PDE_01451 PE=3 SV=1	1	1	0.0032	203573	5.84
	R16065_9_7451_1,2324	R.SELAHR.I ! K.SELAHR.I	712.374	0.00092	2	1	22.47	0	0.064	0|0	S7ZC48 ! S7Z8I6		6.47	0		0	2	MASCOT		T
123	tr|S7ZC87|S7ZC87_PENO1 Uncharacterized protein OS=Penicillium oxalicum (strain 114-2 / CGMCC 5302) GN=PDE_02793 PE=4 SV=1	1	1	0.0671	16440.3	8.89
	R16065_9_7451_1,7465	K.IGVLEVDEEK.G	1130.59	0.00121	2	1	47.06	0	0.000284	0|0	S7ZC87		4	0		0	2	MASCOT		T
124	tr|S7ZCK5|S7ZCK5_PENO1 Putative beta-1,3-glucanase OS=Penicillium oxalicum (strain 114-2 / CGMCC 5302) GN=PDE_03291 PE=4 SV=1	1	1	0.0132	51654.2	5.51
	R16065_9_7451_1,3341	R.VEVVAK.L	644.398	0.0001	2	1	22.06	0	0.0818	0|0	S7ZCK5		5.97	0		0	2	MASCOT		T
125	tr|S7ZCQ8|S7ZCQ8_PENO1 Uncharacterized protein OS=Penicillium oxalicum (strain 114-2 / CGMCC 5302) GN=PDE_03005 PE=3 SV=1	1	1	0.0909	17875.5	9.49
	R16065_9_7451_1,5595	R.VTGGEVGAQSALAPK.I	1384.74	0.01035	2	1	83.53	0	6.23e-08	0|0	S7ZCQ8		5.97	0		0	2	MASCOT		T
126	tr|S7ZCV0|S7ZCV0_PENO1 Uncharacterized protein OS=Penicillium oxalicum (strain 114-2 / CGMCC 5302) GN=PDE_03406 PE=4 SV=1	1	1	0.0102	84676.3	6.96
	R16065_9_7451_1,2539	K.APSASQIR.K	829.453	-0.00011	2	1	24.63	0	0.084	0|0	S7ZCV0		9.8	0		0	2	MASCOT		T
127	tr|S7ZDA7|S7ZDA7_PENO1 Uncharacterized protein OS=Penicillium oxalicum (strain 114-2 / CGMCC 5302) GN=PDE_03581 PE=4 SV=1	1	1	0.0128	79746.6	6.91
	R16065_9_7451_1,5589	K.AGLESQLNR.M	987.522	0.00071	2	1	65.73	0	2.46e-06	0|0	S7ZDA7		6.05	0		0	2	MASCOT		T
128	tr|S7ZDD6|S7ZDD6_PENO1 Phosphoinositide phospholipase C OS=Penicillium oxalicum (strain 114-2 / CGMCC 5302) GN=PDE_01634 PE=4 SV=1	1	1	0.014	71569.1	5.7
	R16065_9_7451_1,8393	R.VLHGYTLTK.A	1031.59	-0.00988	2	1	22.41	0	0.039	0|0	S7ZDD6		8.57	0		0	2	MASCOT		T
129	tr|S7ZE16|S7ZE16_PENO1 Uncharacterized protein OS=Penicillium oxalicum (strain 114-2 / CGMCC 5302) GN=PDE_03821 PE=3 SV=1	1	1	0.0278	43577.8	5.58
	R16065_9_7451_1,2318	R.GHIESHTDSER.L	1267.57	-0.00105	3	1	23.8	0	0.0102	0|0	S7ZE16		5.27	0		0	2	MASCOT		T
130-1	tr|S7ZEC9|S7ZEC9_PENO1 Uncharacterized protein OS=Penicillium oxalicum (strain 114-2 / CGMCC 5302) GN=PDE_03961 PE=4 SV=1	1	1	0.0203	33080.4	6.94
130-2	tr|S8B5S6|S8B5S6_PENO1 Uncharacterized protein OS=Penicillium oxalicum (strain 114-2 / CGMCC 5302) GN=PDE_04897 PE=4 SV=1	1	1	0.039	17623.4	9.74
130-3	tr|S7ZCC4|S7ZCC4_PENO1 Uncharacterized protein OS=Penicillium oxalicum (strain 114-2 / CGMCC 5302) GN=PDE_02848 PE=4 SV=1	1	1	0.009	75547.1	5.64
	R16065_9_7451_1,2806	K.QLEDGR.T	717.353	-0.00014	2	1	20.3	0	0.166	0|0	S8B5S6/S7ZEC9/S7ZCC4		4.37	0		0	2	MASCOT		T
131	tr|S7ZEN7|S7ZEN7_PENO1 Uncharacterized protein OS=Penicillium oxalicum (strain 114-2 / CGMCC 5302) GN=PDE_03685 PE=3 SV=1	1	1	0.0057	118640	4.88
	R16065_9_7451_1,2931	M.SPALQK.G	643.377	-0.00279	2	1	20.78	0	0.043	0|0	S7ZEN7		8.47	0		0	2	MASCOT		T
132	tr|S7ZEU4|S7ZEU4_PENO1 Uncharacterized protein OS=Penicillium oxalicum (strain 114-2 / CGMCC 5302) GN=PDE_04139 PE=4 SV=1	1	1	0.015	82678.9	7.29
	R16065_9_7451_1,2546	K.AGVTCDKLSVR.D	1205.63	0.01797	2	1	24.02	0	0.0963	0|0	S7ZEU4		8.27	1		0	2	MASCOT		T
133	tr|S7ZFG9|S7ZFG9_PENO1 Uncharacterized protein OS=Penicillium oxalicum (strain 114-2 / CGMCC 5302) GN=PDE_02324 PE=3 SV=1	1	1	0.0258	51085.7	6.03
	R16065_9_7451_1,8795	K.VLLLENVNQAGR.D	1325.75	0.00083	2	1	32.81	0	0.00474	0|0	S7ZFG9		5.97	0		0	2	MASCOT		T
134	tr|S7ZG21|S7ZG21_PENO1 Uncharacterized protein OS=Penicillium oxalicum (strain 114-2 / CGMCC 5302) GN=PDE_02544 PE=3 SV=1	1	1	0.039	31341.5	4.73
	R16065_9_7451_1,3241	K.VAATAAHEAYK.N	1131.58	0.00654	2	1	59.42	0	2.7e-05	0|0	S7ZG21		6.72	0		0	2	MASCOT		T
135	tr|S7ZG64|S7ZG64_PENO1 Uncharacterized protein OS=Penicillium oxalicum (strain 114-2 / CGMCC 5302) GN=PDE_02590 PE=3 SV=1	1	1	0.0826	11067.2	4.08
	R16065_9_7451_1,7146	K.IQTILSAAK.I	944.577	-0.00092	2	1	26.83	0	0.0104	0|0	S7ZG64		8.75	0		0	2	MASCOT		T
136	tr|S7ZGT7|S7ZGT7_PENO1 Uncharacterized protein OS=Penicillium oxalicum (strain 114-2 / CGMCC 5302) GN=PDE_04825 PE=4 SV=1	1	1	0.1371	14077.9	9.4
	R16065_9_7451_1,7272	R.VGNLGDSVVISQAGEGK.I	1629.84	-0.00847	2	1	45.57	0	0.00052	0|0	S7ZGT7		4.37	0		0	2	MASCOT		T
137	tr|S7ZH75|S7ZH75_PENO1 60S acidic ribosomal protein P0 OS=Penicillium oxalicum (strain 114-2 / CGMCC 5302) GN=PDE_02971 PE=3 SV=1	1	1	0.0353	33105.5	4.82
	R16065_9_7451_1,8525	K.GFITENPEFER.L	1338.63	-0.00028	2	1	32.23	0	0.00557	0|0	S7ZH75		4.25	0		0	2	MASCOT		T
138	tr|S7ZHB8|S7ZHB8_PENO1 Uncharacterized protein OS=Penicillium oxalicum (strain 114-2 / CGMCC 5302) GN=PDE_05015 PE=4 SV=1	1	1	0.0095	69259.4	5.24
	R16065_9_7451_1,3114	R.AAELAR.T	630.357	-0.00017	2	1	29.71	0	0.0148	0|0	S7ZHB8		6.05	0		0	2	MASCOT		T
139	tr|S7ZHE2|S7ZHE2_PENO1 Uncharacterized protein OS=Penicillium oxalicum (strain 114-2 / CGMCC 5302) GN=PDE_05035 PE=4 SV=1	1	1	0.0318	33691.4	9.82
	R16065_9_7451_1,4826	R.VTAGNDAAFR.D	1021.51	-0.00185	2	1	23.62	0	0.0332	0|0	S7ZHE2		5.81	0		0	2	MASCOT		T
140	tr|S7ZHT0|S7ZHT0_PENO1 Uncharacterized protein OS=Penicillium oxalicum (strain 114-2 / CGMCC 5302) GN=PDE_04764 PE=3 SV=1	1	1	0.0213	47038.9	5.22
	R16065_9_7451_1,3711	R.FDAQTGADR.E	980.443	-0.00952	2	1	38.17	0	0.00126	0|0	S7ZHT0		4.21	0		0	2	MASCOT		T
141	tr|S7ZJN5|S7ZJN5_PENO1 Uncharacterized protein OS=Penicillium oxalicum (strain 114-2 / CGMCC 5302) GN=PDE_03807 PE=3 SV=1	1	1	0.0733	15780	10.91
	R16065_9_7451_1,4560	K.TPGPGAQSALR.A	1054.56	-0.00123	2	1	43.53	0	0.000257	0|0	S7ZJN5		9.41	0		0	2	MASCOT		T
142	tr|S7ZKP0|S7ZKP0_PENO1 Uncharacterized protein OS=Penicillium oxalicum (strain 114-2 / CGMCC 5302) GN=PDE_05796 PE=4 SV=1	1	1	0.0448	15538.6	9.91
	R16065_9_7451_1,4837	R.LGALYR.A	692.409	-8e-05	2	1	23.47	0	0.0299	0|0	S7ZKP0		8.75	0		0	2	MASCOT		T
143	tr|S7ZMW8|S7ZMW8_PENO1 Uncharacterized protein OS=Penicillium oxalicum (strain 114-2 / CGMCC 5302) GN=PDE_06651 PE=4 SV=1	1	1	0.0101	66686.5	6.65
	R16065_9_7451_1,2211	R.QVHDVK.T	725.394	-0.00039	2	1	31.25	0	0.00326	0|0	S7ZMW8		6.74	0		0	2	MASCOT		T
144	tr|S7ZND5|S7ZND5_PENO1 Uncharacterized protein OS=Penicillium oxalicum (strain 114-2 / CGMCC 5302) GN=PDE_07155 PE=4 SV=1	1	1	0.0125	93930.9	8.73
	R16065_9_7451_1,9974	R.NDVLDVLDDK.R	1145.57	-0.00426	2	1	26.31	0	0.0552	0|0	S7ZND5		3.77	0		0	2	MASCOT		T
145	tr|S7ZNE8|S7ZNE8_PENO1 Uncharacterized protein OS=Penicillium oxalicum (strain 114-2 / CGMCC 5302) GN=PDE_06802 PE=4 SV=1	1	1	0.1182	12547.5	4.84
	R16065_9_7451_1,3142	R.QAQNHIEQEDESR.F	1583.7	6e-05	3	1	25.36	0	0.008	0|0	S7ZNE8		4.4	0		0	2	MASCOT		T
146-1	tr|S7ZNF9|S7ZNF9_PENO1 Uncharacterized protein OS=Penicillium oxalicum (strain 114-2 / CGMCC 5302) GN=PDE_06817 PE=4 SV=1	1	1	0.0051	109130	9.14
146-2	tr|S8B6J8|S8B6J8_PENO1 Uncharacterized protein OS=Penicillium oxalicum (strain 114-2 / CGMCC 5302) GN=PDE_05233 PE=4 SV=1	1	1	0.0068	80583.6	8.05
146-3	tr|S7ZK09|S7ZK09_PENO1 Uncharacterized protein OS=Penicillium oxalicum (strain 114-2 / CGMCC 5302) GN=PDE_03967 PE=4 SV=1	1	1	0.0079	70385.7	6.15
146-4	tr|S7Z3N8|S7Z3N8_PENO1 Probable mitochondrial transport protein OS=Penicillium oxalicum (strain 114-2 / CGMCC 5302) GN=PDE_00066 PE=3 SV=1	1	1	0.0147	36405.9	9.79
146-5	tr|S8AVM8|S8AVM8_PENO1 Uncharacterized protein OS=Penicillium oxalicum (strain 114-2 / CGMCC 5302) GN=PDE_00858 PE=4 SV=1	1	1	0.0089	62097.2	8.09
146-6	tr|S7ZAM7|S7ZAM7_PENO1 Uncharacterized protein OS=Penicillium oxalicum (strain 114-2 / CGMCC 5302) GN=PDE_02609 PE=4 SV=1	1	1	0.0087	61640.5	5.35
146-7	tr|S7ZBN3|S7ZBN3_PENO1 Uncharacterized protein OS=Penicillium oxalicum (strain 114-2 / CGMCC 5302) GN=PDE_02950 PE=4 SV=1	1	1	0.0245	23230.3	6.62
146-8	tr|S8AXH9|S8AXH9_PENO1 Uncharacterized protein OS=Penicillium oxalicum (strain 114-2 / CGMCC 5302) GN=PDE_01575 PE=4 SV=1	1	1	0.0085	65081.7	9.28
	R16065_9_7451_1,5118	R.LIISR.S ! R.LIISR.T ! R.LILSR.L ! K.LILSR.L ! R.LILSR.G ! R.LILSR.E ! R.LLLSR.G ! K.LLLSR.T	601.403	0.01043	2	1	21.27	0	0.0646	0|0	S7ZK09 ! S8B6J8 ! S7Z3N8 ! S7ZNF9 ! S8AVM8 ! S7ZBN3 ! S8AXH9 ! S7ZAM7		9.75	0		0	2	MASCOT		T
147	tr|S7ZNL9|S7ZNL9_PENO1 S-adenosylmethionine synthase OS=Penicillium oxalicum (strain 114-2 / CGMCC 5302) GN=PDE_07230 PE=3 SV=1	1	1	0.0385	42392.6	5.66
	R16065_9_7451_1,8240	R.FVIGGPQGDAGLTGR.K	1444.75	0.00161	2	1	69.2	0	1.86e-06	0|0	S7ZNL9		5.84	0		0	2	MASCOT		T
148	tr|S7ZP11|S7ZP11_PENO1 Peptidyl-prolyl cis-trans isomerase OS=Penicillium oxalicum (strain 114-2 / CGMCC 5302) GN=PDE_05327 PE=3 SV=1	1	1	0.0751	18912.2	8.87
	R16065_9_7451_1,5509	K.EIEALGSSSGSPR.S	1289.63	0.00044	2	1	58.3	0	3.22e-05	0|0	S7ZP11		4.53	0		0	2	MASCOT		T
149	tr|S7ZPB5|S7ZPB5_PENO1 Uncharacterized protein OS=Penicillium oxalicum (strain 114-2 / CGMCC 5302) GN=PDE_07189 PE=3 SV=1	1	1	0.0417	19504.4	11.51
	R16065_9_7451_1,2463	K.NKEELAK.Q	831.457	0.00429	2	1	23.68	0	0.118	0|0	S7ZPB5		6.14	1		0	2	MASCOT		T
150	tr|S7ZPG1|S7ZPG1_PENO1 Uncharacterized protein OS=Penicillium oxalicum (strain 114-2 / CGMCC 5302) GN=PDE_07570 PE=4 SV=1	1	1	0.042	16071.9	4.76
	R16065_9_7451_1,2640	R.LECENR.D	820.362	0.00079	2	1	30.15	0	0.00184	0|0	S7ZPG1		4.53	0		0	2	MASCOT		T
151	tr|S7ZPH4|S7ZPH4_PENO1 Catalase-peroxidase OS=Penicillium oxalicum (strain 114-2 / CGMCC 5302) GN=KATG PE=3 SV=1	1	1	0.0148	82773.7	5.93
	R16065_9_7451_1,5512	R.YDVVYSGNQGR.A	1257.59	-0.0028	2	1	28.74	0	0.00495	0|0	S7ZPH4		5.84	0		0	2	MASCOT		T
152	tr|S7ZQ11|S7ZQ11_PENO1 Uncharacterized protein OS=Penicillium oxalicum (strain 114-2 / CGMCC 5302) GN=PDE_05678 PE=3 SV=1	1	1	0.0233	29929.2	9.91
	R16065_9_7451_1,8753	K.LVFVVR.I	732.477	0.00396	2	1	30	0	0.0022	0|0	S7ZQ11		9.75	0		0	2	MASCOT		T
153	tr|S7ZQZ8|S7ZQZ8_PENO1 Uncharacterized protein OS=Penicillium oxalicum (strain 114-2 / CGMCC 5302) GN=PDE_07774 PE=4 SV=1	1	1	0.0763	14924.5	11.53
	R16065_9_7451_1,9441	K.DVELLLMHNR.T	1239.65	0.00127	2	1	54.24	0	2.64e-05	0|0	S7ZQZ8		5.32	0		0	2	MASCOT		T
154-1	tr|S7ZRS3|S7ZRS3_PENO1 Histone H4 OS=Penicillium oxalicum (strain 114-2 / CGMCC 5302) GN=PDE_08392 PE=3 SV=1	1	1	0.0971	11372.2	11.36
154-2	tr|S7Z5B7|S7Z5B7_PENO1 Histone H4 OS=Penicillium oxalicum (strain 114-2 / CGMCC 5302) GN=PDE_00232 PE=3 SV=1	1	1	0.0971	11356.2	11.36
	R16065_9_7451_1,3912	R.DAVTYTEHAK.R	1134.54	0.00985	2	1	26.1	0	0.0228	0|0	S7Z5B7/S7ZRS3		5.32	0		0	2	MASCOT		T
155	tr|S7ZSC7|S7ZSC7_PENO1 Uncharacterized protein OS=Penicillium oxalicum (strain 114-2 / CGMCC 5302) GN=PDE_08582 PE=4 SV=1	1	1	0.0128	95720	8.67
	R16065_9_7451_1,2494	K.TASSQGGSAVR.D	1020.51	-0.00586	2	1	28.77	0	0.0222	0|0	S7ZSC7		9.41	0		0	2	MASCOT		T
156	tr|S7ZSD5|S7ZSD5_PENO1 Uncharacterized protein OS=Penicillium oxalicum (strain 114-2 / CGMCC 5302) GN=PDE_06586 PE=4 SV=1	1	1	0.0302	28424.9	5.62
	R16065_9_7451_1,5025	R.GMGIEAAR.G	804.403	0.0105	2	1	23.51	0	0.0693	0|0	S7ZSD5		6	0		0	2	MASCOT		T
157	tr|S7ZTB4|S7ZTB4_PENO1 Uncharacterized protein OS=Penicillium oxalicum (strain 114-2 / CGMCC 5302) GN=PDE_08907 PE=4 SV=1	1	1	0.0304	46839.6	5.85
	R16065_9_7451_1,5319	K.GGQPSIISNTSSR.N	1303.66	-0.01266	2	1	31.36	0	0.0171	0|0	S7ZTB4		9.75	0		0	2	MASCOT		T
158	tr|S7ZTF6|S7ZTF6_PENO1 Uncharacterized protein OS=Penicillium oxalicum (strain 114-2 / CGMCC 5302) GN=PDE_08676 PE=4 SV=1	1	1	0.0312	50192.6	5.55
	R16065_9_7451_1,9279	R.AAVFDTIVSNPGVR.F	1445.77	-0.00011	2	1	29.7	0	0.00997	0|0	S7ZTF6		5.88	0		0	2	MASCOT		T
159	tr|S7ZTF8|S7ZTF8_PENO1 Uncharacterized protein OS=Penicillium oxalicum (strain 114-2 / CGMCC 5302) GN=PDE_07010 PE=4 SV=1	1	1	0.0269	57261.6	5.32
	R16065_9_7451_1,4715	K.TLVHEDNPPATCVK.F	1580.77	0.001	2	1	47.3	0	0.000253	0|0	S7ZTF8		5.29	0		0	2	MASCOT		T
160	tr|S7ZU24|S7ZU24_PENO1 Uncharacterized protein OS=Penicillium oxalicum (strain 114-2 / CGMCC 5302) GN=PDE_09174 PE=3 SV=1	1	1	0.0795	16784.6	10.37
	R16065_9_7451_1,8020	K.GATPSQIGVVLR.D	1197.7	-0.00092	2	1	38.27	0	0.000551	0|0	S7ZU24		9.75	0		0	2	MASCOT		T
161	tr|S7ZUA0|S7ZUA0_PENO1 Uncharacterized protein OS=Penicillium oxalicum (strain 114-2 / CGMCC 5302) GN=PDE_07281 PE=3 SV=1	1	1	0.0662	16700.5	5.71
	R16065_9_7451_1,4900	K.TVLSEASGGK.A	948.5	-0.00194	2	1	32.01	0	0.0062	0|0	S7ZUA0		5.66	0		0	2	MASCOT		T
162-1	tr|S7ZUB9|S7ZUB9_PENO1 Uncharacterized protein OS=Penicillium oxalicum (strain 114-2 / CGMCC 5302) GN=PDE_08991 PE=4 SV=1	1	1	0.0181	30879.5	6.06
162-2	tr|S8BCP1|S8BCP1_PENO1 Uncharacterized protein OS=Penicillium oxalicum (strain 114-2 / CGMCC 5302) GN=PDE_07672 PE=4 SV=1	1	1	0.0093	58934.1	5.86
	R16065_9_7451_1,3274	R.INARR.T ! K.LNARR.L	629.384	0.01095	2	1	21.96	0	0.0548	0|0	S7ZUB9 ! S8BCP1		12	1		0	2	MASCOT		T
163	tr|S7ZVI6|S7ZVI6_PENO1 Uncharacterized protein OS=Penicillium oxalicum (strain 114-2 / CGMCC 5302) GN=PDE_09714 PE=4 SV=1	1	1	0.0821	15059.3	6.72
	R16065_9_7451_1,8612	K.VSNIDNEVIFK.A	1277.67	0.00086	2	1	28.47	0	0.0333	0|0	S7ZVI6		4.37	0		0	2	MASCOT		T
164	tr|S7ZVK4|S7ZVK4_PENO1 Uncharacterized protein OS=Penicillium oxalicum (strain 114-2 / CGMCC 5302) GN=PDE_09729 PE=4 SV=1	1	1	0.0105	73022.7	5.03
	R16065_9_7451_1,2516	R.AQEDTPR.V	816.385	-0.00811	2	1	32.55	0	0.00434	0|0	S7ZVK4		4.37	0		0	2	MASCOT		T
165	tr|S7ZW55|S7ZW55_PENO1 Uncharacterized protein OS=Penicillium oxalicum (strain 114-2 / CGMCC 5302) GN=PDE_07957 PE=3 SV=1	1	1	0.0222	53798.5	5.87
	R16065_9_7451_1,4181	K.VITAVHEATEK.D	1197.65	-0.00536	2	1	24.38	0	0.058	0|0	S7ZW55		5.4	0		0	2	MASCOT		T
166	tr|S7ZWH2|S7ZWH2_PENO1 Uncharacterized protein OS=Penicillium oxalicum (strain 114-2 / CGMCC 5302) GN=PDE_09758 PE=4 SV=1	1	1	0.0178	69007.4	6.3
	R16065_9_7451_1,8251	R.VIDACEIPLER.E	1314.67	-0.00053	2	1	37.98	0	0.00242	0|0	S7ZWH2		4.14	0		0	2	MASCOT		T
167	tr|S7ZWW3|S7ZWW3_PENO1 Putative glycogen synthase OS=Penicillium oxalicum (strain 114-2 / CGMCC 5302) GN=PDE_09899 PE=4 SV=1	1	1	0.0112	81347	6.18
	R16065_9_7451_1,5329	K.DLITSQDR.V	947.479	-0.00096	2	1	21.64	0	0.0696	0|0	S7ZWW3		4.21	0		0	2	MASCOT		T
168	tr|S7ZWX8|S7ZWX8_PENO1 Uncharacterized protein OS=Penicillium oxalicum (strain 114-2 / CGMCC 5302) GN=PDE_09914 PE=3 SV=1	1	1	0.0149	66400.8	5.3
	R16065_9_7451_1,4389	K.TVISQSVSK.F	948.536	0.00332	2	1	22.47	0	0.0679	0|0	S7ZWX8		8.41	0		0	2	MASCOT		T
169	tr|S7ZZ15|S7ZZ15_PENO1 Uncharacterized protein OS=Penicillium oxalicum (strain 114-2 / CGMCC 5302) GN=PDE_09023 PE=4 SV=1	1	1	0.023	33601	8.79
	R16065_9_7451_1,4070	R.RLEDLER.R	930.5	0.0002	2	1	23.29	0	0.0509	0|0	S7ZZ15		4.68	1		0	2	MASCOT		T
170	tr|S8AI85|S8AI85_PENO1 Isocitrate dehydrogenase [NAD] subunit, mitochondrial OS=Penicillium oxalicum (strain 114-2 / CGMCC 5302) GN=PDE_00366 PE=3 SV=1	1	1	0.0313	41501.2	8.14
	R16065_9_7451_1,9289	K.TPYDGVDTVLIR.E	1348.71	-0.00026	2	1	36.14	0	0.00231	0|0	S8AI85		4.21	0		0	2	MASCOT		T
171	tr|S8AIY5|S8AIY5_PENO1 Uncharacterized protein OS=Penicillium oxalicum (strain 114-2 / CGMCC 5302) GN=PDE_00674 PE=4 SV=1	1	1	0.0128	51133.6	6.11
	R16065_9_7451_1,3951	K.EAEKLR.A	745.42	-8e-05	2	1	22.25	0	0.107	0|0	S8AIY5		6.24	1		0	2	MASCOT		T
172	tr|S8AKN8|S8AKN8_PENO1 Uncharacterized protein OS=Penicillium oxalicum (strain 114-2 / CGMCC 5302) GN=PDE_01304 PE=3 SV=1	1	1	0.0066	86713.2	5.57
	R16065_9_7451_1,2215	K.M*RLEK.L	692.376	0.00322	2	1	23.31	0	0.0695	0|0	S8AKN8		8.5	1	15.994919 Oxidation (M)	0	2	MASCOT		T
173	tr|S8AMY1|S8AMY1_PENO1 Uncharacterized protein OS=Penicillium oxalicum (strain 114-2 / CGMCC 5302) GN=PDE_02196 PE=4 SV=1	1	1	0.0232	46384.9	5.4
	R16065_9_7451_1,3783	K.GADGAEIGAR.T	916.448	-0.00123	2	1	35.8	0	0.00126	0|0	S8AMY1		4.37	0		0	2	MASCOT		T
174	tr|S8ANW2|S8ANW2_PENO1 Uncharacterized protein OS=Penicillium oxalicum (strain 114-2 / CGMCC 5302) GN=PDE_02546 PE=3 SV=1	1	1	0.0137	47483	5.2
	R16065_9_7451_1,3871	K.ENIDVK.D	717.378	0.00193	2	1	24.48	0	0.0517	0|0	S8ANW2		4.37	0		0	2	MASCOT		T
175	tr|S8APB9|S8APB9_PENO1 Uncharacterized protein OS=Penicillium oxalicum (strain 114-2 / CGMCC 5302) GN=PDE_02707 PE=3 SV=1	1	1	0.0396	22965.7	10.79
	R16065_9_7451_1,6806	R.VVVPQALR.V	881.557	0.00285	2	1	28.95	0	0.00166	0|0	S8APB9		9.72	0		0	2	MASCOT		T
176	tr|S8AS47|S8AS47_PENO1 Uncharacterized protein OS=Penicillium oxalicum (strain 114-2 / CGMCC 5302) GN=PDE_03779 PE=3 SV=1	1	1	0.1101	10916.9	4.23
	R16065_9_7451_1,8761	K.NLQDLISEGSSK.L	1290.65	-0.00204	2	1	47.01	0	0.000176	0|0	S8AS47		4.37	0		0	2	MASCOT		T
177	tr|S8AUV1|S8AUV1_PENO1 Putative chitinase OS=Penicillium oxalicum (strain 114-2 / CGMCC 5302) GN=PDE_04898 PE=3 SV=1	1	1	0.0275	43729.4	5.58
	R16065_9_7451_1,2973	R.HNLDTAAGPHR.K	1188.59	-3e-05	3	1	55.58	0	1.85e-05	0|0	S8AUV1		6.92	0		0	2	MASCOT		T
178	tr|S8AVG3|S8AVG3_PENO1 Pyruvate kinase OS=Penicillium oxalicum (strain 114-2 / CGMCC 5302) GN=PDE_05188 PE=3 SV=1	1	1	0.019	57888.6	6.21
	R16065_9_7451_1,7874	R.TSIIGTIGPK.T	986.588	-0.00229	2	1	23.53	0	0.0279	0|0	S8AVG3		8.41	0		0	2	MASCOT		T
179	tr|S8AW17|S8AW17_PENO1 Uncharacterized protein OS=Penicillium oxalicum (strain 114-2 / CGMCC 5302) GN=PDE_01008 PE=3 SV=1	1	1	0.0273	34428.4	6.36
	R16065_9_7451_1,5543	K.AAGVFNPQR.L	959.506	-0.00699	2	1	24.3	0	0.0999	0|0	S8AW17		9.8	0		0	2	MASCOT		T
180	tr|S8AWE4|S8AWE4_PENO1 Uncharacterized protein OS=Penicillium oxalicum (strain 114-2 / CGMCC 5302) GN=PDE_05555 PE=4 SV=1	1	1	0.0524	22217.8	9.98
	R16065_9_7451_1,4523	R.MKEGVMDRLGK.D	1263.65	0.00204	2	1	23.98	0	0.1	0|0	S8AWE4		8.34	2		0	2	MASCOT		T
181	tr|S8AX17|S8AX17_PENO1 Uncharacterized protein OS=Penicillium oxalicum (strain 114-2 / CGMCC 5302) GN=PDE_01394 PE=4 SV=1	1	1	0.013	43382.8	5.57
	R16065_9_7451_1,2290	R.DQMAR.S	620.282	0.00933	2	1	22.98	0	0.0176	0|0	S8AX17		5.84	0		0	2	MASCOT		T
182	tr|S8AX21|S8AX21_PENO1 Uncharacterized protein OS=Penicillium oxalicum (strain 114-2 / CGMCC 5302) GN=PDE_05805 PE=4 SV=1	1	1	0.0132	84312	5.75
	R16065_9_7451_1,7176	R.STNESEVKLR.N	1162.61	-0.00923	3	1	28.26	0	0.0422	0|0	S8AX21		5.86	1		0	2	MASCOT		T
183	tr|S8AXG6|S8AXG6_PENO1 Uncharacterized protein OS=Penicillium oxalicum (strain 114-2 / CGMCC 5302) GN=PDE_05997 PE=3 SV=1	1	1	0.0315	37318.6	6.86
	R16065_9_7451_1,8480	K.EALQMAPSLVR.N	1214.66	0.0022	2	1	34.27	0	0.0032	0|0	S8AXG6		6.1	0		0	2	MASCOT		T
184	tr|S8AYC9|S8AYC9_PENO1 Uncharacterized protein OS=Penicillium oxalicum (strain 114-2 / CGMCC 5302) GN=PDE_06303 PE=4 SV=1	1	1	0.0181	46070.8	7.68
	R16065_9_7451_1,3626	K.TDEEIAR.L	833.4	0.00105	2	1	20.46	0	0.0477	0|0	S8AYC9		4.14	0		0	2	MASCOT		T
185	tr|S8AZF0|S8AZF0_PENO1 Uncharacterized protein OS=Penicillium oxalicum (strain 114-2 / CGMCC 5302) GN=PDE_02305 PE=3 SV=1	1	1	0.094	16501.1	10.47
	R16065_9_7451_1,9470	R.LTPDVDALDIAATK.L	1442.77	0.00097	2	1	74.66	0	4.51e-07	0|0	S8AZF0		3.93	0		0	2	MASCOT		T
186	tr|S8AZG5|S8AZG5_PENO1 40S ribosomal protein S1 OS=Penicillium oxalicum (strain 114-2 / CGMCC 5302) GN=RPS1 PE=3 SV=1	1	1	0.0313	29235.5	10.05
	R16065_9_7451_1,7458	K.TTDDYLLR.L	996.5	0.00692	2	1	66.42	0	3.18e-06	0|0	S8AZG5		4.21	0		0	2	MASCOT		T
187	tr|S8B0G9|S8B0G9_PENO1 Uncharacterized protein OS=Penicillium oxalicum (strain 114-2 / CGMCC 5302) GN=PDE_02751 PE=4 SV=1	1	1	0.0741	15038.9	4.98
	R16065_9_7451_1,2460	R.AQQQAAQEAR.T	1100.54	-0.00011	2	1	26.87	0	0.0112	0|0	S8B0G9		6.05	0		0	2	MASCOT		T
188	tr|S8B1K5|S8B1K5_PENO1 Uncharacterized protein OS=Penicillium oxalicum (strain 114-2 / CGMCC 5302) GN=PDE_03178 PE=3 SV=1	1	1	0.0168	46842.6	10.17
	R16065_9_7451_1,9328	K.NDFVLLK.G	848.488	2e-05	2	1	25.78	0	0.0174	0|0	S8B1K5		5.84	0		0	2	MASCOT		T
189	tr|S8B300|S8B300_PENO1 Uncharacterized protein OS=Penicillium oxalicum (strain 114-2 / CGMCC 5302) GN=PDE_08175 PE=4 SV=1	1	1	0.0066	97535.9	8.77
	R16065_9_7451_1,4665	R.TIDDLK.N	704.382	-0.01023	2	1	30.5	0	0.0138	0|0	S8B300		4.21	0		0	2	MASCOT		T
190	tr|S8B324|S8B324_PENO1 Uncharacterized protein OS=Penicillium oxalicum (strain 114-2 / CGMCC 5302) GN=PDE_08205 PE=4 SV=1	1	1	0.1429	6731.74	10.13
	R16065_9_7451_1,5526	K.STDIGFNK.Y	881.436	0.0036	2	1	33.86	0	0.00833	0|0	S8B324		5.55	0		0	2	MASCOT		T
191	tr|S8B3Z6|S8B3Z6_PENO1 Uncharacterized protein OS=Penicillium oxalicum (strain 114-2 / CGMCC 5302) GN=PDE_04196 PE=4 SV=1	1	1	0.0072	78111.1	6.03
	R16065_9_7451_1,3037	K.YNPAR.G	620.315	6e-05	2	1	23.17	0	0.046	0|0	S8B3Z6		8.75	0		0	2	MASCOT		T
192	tr|S8B5L5|S8B5L5_PENO1 Uncharacterized protein OS=Penicillium oxalicum (strain 114-2 / CGMCC 5302) GN=PDE_04802 PE=4 SV=1	1	1	0.0306	39670.4	5.63
	R16065_9_7451_1,8264	K.AGVIVGDDVLR.L	1113.63	-0.00068	2	1	36.67	0	0.00145	0|0	S8B5L5		4.21	0		0	2	MASCOT		T
193	tr|S8B5L8|S8B5L8_PENO1 Uncharacterized protein OS=Penicillium oxalicum (strain 114-2 / CGMCC 5302) GN=PDE_09122 PE=4 SV=1	1	1	0.0398	22303	5.14
	R16065_9_7451_1,3256	R.YATEGVNK.L	881.436	0.00358	2	1	24.32	0	0.0749	0|0	S8B5L8		6	0		0	2	MASCOT		T
194	tr|S8B5S0|S8B5S0_PENO1 Uncharacterized protein OS=Penicillium oxalicum (strain 114-2 / CGMCC 5302) GN=PDE_09172 PE=4 SV=1	1	1	0.0741	8691.77	5.07
	R16065_9_7451_1,4374	R.VYLNEK.I	765.414	0.00036	2	1	24.69	0	0.0275	0|0	S8B5S0		5.97	0		0	2	MASCOT		T
195	tr|S8B7X4|S8B7X4_PENO1 60S ribosomal protein L13 OS=Penicillium oxalicum (strain 114-2 / CGMCC 5302) GN=PDE_05774 PE=3 SV=1	1	1	0.0365	24990.6	11
	R16065_9_7451_1,9544	R.GFTLAELK.E	878.498	0.00056	2	1	23.1	0	0.0328	0|0	S8B7X4		6	0		0	2	MASCOT		T
196	tr|S8B831|S8B831_PENO1 Uncharacterized protein OS=Penicillium oxalicum (strain 114-2 / CGMCC 5302) GN=PDE_05819 PE=3 SV=1	1	1	0.1081	8542.99	6.53
	R16065_9_7451_1,8475	K.VVGDLWER.Y	973.51	-0.00256	2	1	20.27	0	0.236	0|0	S8B831		4.37	0		0	2	MASCOT		T
197	tr|S8B8A5|S8B8A5_PENO1 Uncharacterized protein OS=Penicillium oxalicum (strain 114-2 / CGMCC 5302) GN=PDE_05911 PE=4 SV=1	1	1	0.0213	67331.7	9.09
	R16065_9_7451_1,9645	K.LEGVSRTRLSGPR.H	1427.81	0.015	2	1	24.79	0	0.0382	0|0	S8B8A5		11.7	2		0	2	MASCOT		T
198	tr|S8B8S8|S8B8S8_PENO1 Glutamate dehydrogenase OS=Penicillium oxalicum (strain 114-2 / CGMCC 5302) GN=PDE_06117 PE=3 SV=1	1	1	0.026	49822.7	5.68
	R16065_9_7451_1,7352	K.NALTGLNMGGGK.G	1132.58	-0.00275	2	1	30.12	0	0.00997	0|0	S8B8S8		8.75	0		0	2	MASCOT		T
199	tr|S8B9J9|S8B9J9_PENO1 Uncharacterized protein OS=Penicillium oxalicum (strain 114-2 / CGMCC 5302) GN=PDE_06417 PE=4 SV=1	1	1	0.0299	29592.4	9.56
	R16065_9_7451_1,2089	K.AEEEAQAK.A	875.41	0.00014	2	1	41.77	0	0.000249	0|0	S8B9J9		4.25	0		0	2	MASCOT		T
200	tr|S8BAQ6|S8BAQ6_PENO1 Uncharacterized protein OS=Penicillium oxalicum (strain 114-2 / CGMCC 5302) GN=PDE_06840 PE=3 SV=1	1	1	0.0056	122830	5.24
	R16065_9_7451_1,2175	K.IANKCR.R	761.409	-0.00408	2	1	26.75	0	0.0521	0|0	S8BAQ6		9.51	1		0	2	MASCOT		T
201	tr|S8BD60|S8BD60_PENO1 Uncharacterized protein OS=Penicillium oxalicum (strain 114-2 / CGMCC 5302) GN=PDE_07853 PE=3 SV=1	1	1	0.0978	10109.8	10.46
	R16065_9_7451_1,1990	K.KAEVSQHAR.Y	1025.55	0.00059	3	1	29.51	0	0.00565	0|0	S8BD60		8.76	1		0	2	MASCOT		T
202	tr|S8BEH3|S8BEH3_PENO1 Acetyl-coenzyme A synthetase OS=Penicillium oxalicum (strain 114-2 / CGMCC 5302) GN=PDE_08414 PE=3 SV=1	1	1	0.021	74201.2	5.71
	R16065_9_7451_1,7361	K.VAIIYEADEPNEGR.T	1575.76	-0.00783	2	1	21.93	0	0.14	0|0	S8BEH3		4	0		0	2	MASCOT		T
203	tr|S8BFE7|S8BFE7_PENO1 Uncharacterized protein OS=Penicillium oxalicum (strain 114-2 / CGMCC 5302) GN=PDE_08779 PE=4 SV=1	1	1	0.0124	96690	6.53
	R16065_9_7451_1,2731	R.QHIIVEEEGPR.I	1306.67	-0.00048	3	1	23.61	0	0.0921	0|0	S8BFE7		4.75	0		0	2	MASCOT		T
204-1	tr|S8BH34|S8BH34_PENO1 Vacuolar serine protease PrtB OS=Penicillium oxalicum (strain 114-2 / CGMCC 5302) GN=PDE_09396 PE=4 SV=1	1	1	0.0258	53290.1	6.02
204-2	tr|Q9HF12|Q9HF12_PENOX Vacuolar serine protease OS=Penicillium oxalicum PE=2 SV=1	1	1	0.0258	53290.1	6.02
	R16065_9_7451_1,6317	K.AVTVGASTLADER.A	1289.67	0.00116	2	1	56.27	0	2.53e-05	0|0	S8BH34/Q9HF12		4.37	0		0	2	MASCOT		T
205	tr|S8BHD2|S8BHD2_PENO1 Uncharacterized protein OS=Penicillium oxalicum (strain 114-2 / CGMCC 5302) GN=PDE_09531 PE=4 SV=1	1	1	0.0184	41309.6	6.05
	R16065_9_7451_1,9215	K.SKEMLLR.L	876.497	0.00439	2	1	27.17	0	0.0279	0|0	S8BHD2		8.46	1		0	2	MASCOT		T
206	tr|S8BHL0|S8BHL0_PENO1 Uncharacterized protein OS=Penicillium oxalicum (strain 114-2 / CGMCC 5302) GN=PDE_09646 PE=4 SV=1	1	1	0.0121	63426.1	7.15
	R16065_9_7451_1,2869	R.GASRVLR.R	758.463	0.01041	2	1	23.9	0	0.0697	0|0	S8BHL0		12	1		0	2	MASCOT		T
207	tr|S8BHU6|S8BHU6_PENO1 4-hydroxyphenylpyruvate dioxygenase OS=Penicillium oxalicum (strain 114-2 / CGMCC 5302) GN=PDE_09761 PE=3 SV=1	1	1	0.0249	45014.8	5.05
	R16065_9_7451_1,8686	K.DIAFQVDDVR.S	1177.58	-0.00793	2	1	34.19	0	0.00955	0|0	S8BHU6		3.93	0		0	2	MASCOT		T
